# Supplementary material for: DMF as an amine source: iron-catalyzed cyclization of 2H-azirines to imidazoles
Source: Royal Society of Chemistry journal article supplement (doi:10.1039/d3cc06147g), 2024-01-01

Supporting Information:

## **DMF as amine source: iron-catalyzed cyclization of 2*H*-azirines to imidazoles**

Mi-Na Zhao,<sup>a\*</sup> Zi-Mo Yang,<sup>b</sup> Lian-Qing Li<sup>a</sup>

<sup>a</sup> College of Chemistry and Chemical Engineering, Shaanxi XueQian Normal University, Xi'an 710100, P. R. China

<sup>b</sup> Shaanxi Key Laboratory of Phytochemistry, College of Chemistry and Chemical Engineering, Baoji University of Arts and Sciences, Baoji, Shaanxi 721013, P. R. China

E-mail: [25040@snsy.edu.cn](mailto:25040@snsy.edu.cn)

### **CONTENTS**

|                                                                                                                                        |                |
|----------------------------------------------------------------------------------------------------------------------------------------|----------------|
| <b>1. General Information-----</b>                                                                                                     | <b>S2</b>      |
| <b>2. Typical Procedure for Cyclization of 2<i>H</i>-Azirines and <i>N,N</i>-Dimethylformamide-----</b>                                | <b>S2</b>      |
| <b>3. Synthesis of 1-Methyl-2,4,5-Triaryl-1<i>H</i>-Imidazoles from 1-Methyl-4,5-Diaryl-1<i>H</i>-Imidazoles and Aryl Iodides-----</b> | <b>S3</b>      |
| <b>4. Optimization of the reaction conditions-----</b>                                                                                 | <b>S3</b>      |
| <b>5. Spectroscopic Data for Imidazoles-----</b>                                                                                       | <b>S4–S12</b>  |
| <b>6. Appendix (Copies of <sup>1</sup>H and <sup>13</sup>C NMR Spectra)-----</b>                                                       | <b>S13–S62</b> |

## 1. General Information

Column chromatography was carried out on silica gel.  $^1\text{H}$  NMR spectra were recorded at 400 MHz in  $\text{CDCl}_3$  and  $^{13}\text{C}$  NMR spectra were recorded at 100 MHz in  $\text{CDCl}_3$ . The following abbreviations were used to explain multiplicities: s = singlet, d = doublet, t = triplet, q = quartet, m = multiplet. Melting points were determined with a digital melting point measuring instrument. All products were further characterized by HRMS; copies of their  $^1\text{H}$  NMR and  $^{13}\text{C}$  NMR spectra are provided. Unless otherwise stated, all reagents and solvents were purchased from commercial suppliers and used without further purification. The *2H*-azirines were in all cases prepared from the corresponding ketoxime acetates according to following literature:

M.-N. Zhao, W. Zhang, X.-C. Wang, Y. Zhang, D.-S. Yang and Z.-H. Guan, *Org. Biomol. Chem.*, 2018, **16**, 4333-4337.

## 2. Typical Procedure for Cycloaddition of *2H*-Azirines and *N,N*-Dimethylformamide

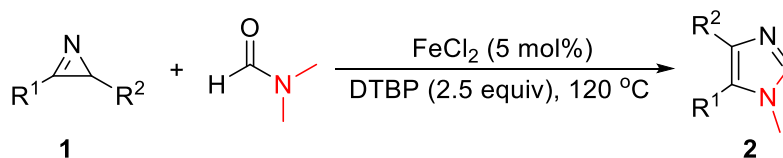

In a 25 mL round bottom flask, the *2H*-azirines **1** (0.2 mmol),  $\text{FeCl}_2$  (5 mol %, 1.27 mg) and DTBP (0.5 mmol, 73 mg) were stirred in *N,N*-dimethylformamide (2 mL) at  $120\text{ }^\circ\text{C}$ . After completion of the reaction (detected by TLC), the reaction mixture was cooled to room temperature, diluted with EtOAc (25 mL) and washed with  $\text{H}_2\text{O}$  (20 mL). The organic layers were dried over anhydrous  $\text{Na}_2\text{SO}_4$  and evaporated in vacuo. The residue was purified by column chromatography on silica gel to afford the corresponding imidazoles **2** with petroleum ether/ethyl acetate (v/v = 2:1) as the eluent.

## 3. Synthesis of 1-Methyl-2,4,5-Triaryl-1*H*-Imidazoles from 1-Methyl-4,5-Diaryl-1*H*-Imidazoles and Aryl Iodides

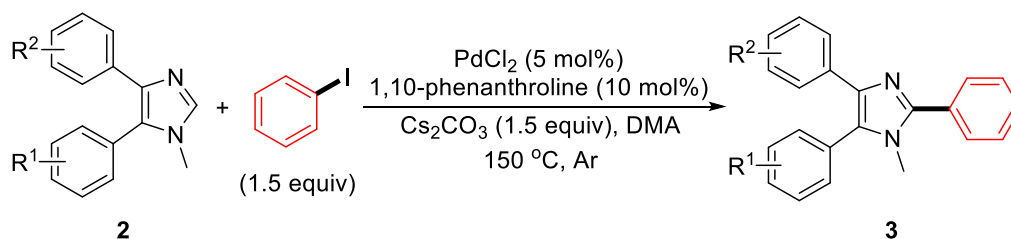

In a 25 mL round bottom flask, the 1-methyl-4,5-diaryl-1*H*-imidazoles **2** (0.2 mmol), iodobenzene (0.3 mmol), PdCl<sub>2</sub> (5 mol%, 1.8 mg), 1,10-phenanthroline (10 mol%, 3.6 mg) and Cs<sub>2</sub>CO<sub>3</sub> (0.3 mmol) were stirred in *N,N*-dimethylacetamide (1 mL) at 150 °C in argon. After completion of the reaction (detected by TLC), the reaction mixture was cooled to room temperature, the resultant mixture poured into H<sub>2</sub>O (20 mL) and extracted with EtOAc (25 mL). After the solvent was evaporated under vacuum, the crude product was purified by column chromatography on silica gel to afford the corresponding 1-methyl-2,4,5-triaryl-1*H*-imidazoles **3** with petroleum ether/ethyl acetate (v/v = 10:1) as the eluent.

#### 4. Optimization of the reaction conditions<sup>a</sup>

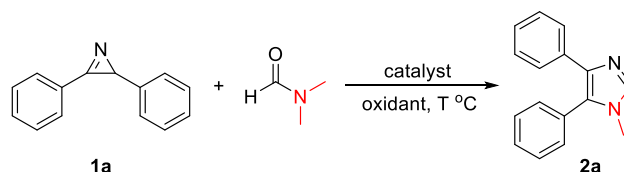

| Entry          | Catalyst                                        | Oxidant                                      | T (°C)     | Yield (%) |
|----------------|-------------------------------------------------|----------------------------------------------|------------|-----------|
| 1 <sup>b</sup> | [M]                                             |                                              | 120        | 0         |
| 2              | FeCl <sub>2</sub>                               |                                              | 120        | 33        |
| 3              | Fe(acac) <sub>2</sub>                           |                                              | 120        | 27        |
| 4              | Fe(OTf) <sub>2</sub>                            |                                              | 120        | 22        |
| 5 <sup>c</sup> | FeCl <sub>2</sub>                               | CHP                                          | 120        | 41        |
| 6              | FeCl <sub>2</sub>                               | K <sub>2</sub> S <sub>2</sub> O <sub>8</sub> | 120        | trace     |
| 7              | FeCl <sub>2</sub>                               | PhI(OAc) <sub>2</sub>                        | 120        | 33        |
| 8              | FeCl <sub>2</sub>                               | TBHP                                         | 120        | 32        |
| <b>9</b>       | <b>FeCl<sub>2</sub></b>                         | <b>DTBP</b>                                  | <b>120</b> | <b>68</b> |
| 10             | FeCl <sub>2</sub>                               | DTBP                                         | 110        | 32        |
| 11             | FeCl <sub>2</sub>                               | DTBP                                         | 100        | 35        |
| 12             | FeCl <sub>2</sub>                               | DTBP                                         | 130        | 44        |
| 13             | FeCl <sub>2</sub>                               | DTBP                                         | 140        | 42        |
| 14             | FeCl <sub>3</sub>                               | DTBP                                         | 120        | 47        |
| 15             | Fe(acac) <sub>3</sub>                           | DTBP                                         | 120        | 49        |
| 16             | Fe(OTf) <sub>3</sub>                            | DTBP                                         | 120        | 50        |
| 17             | Fe <sub>2</sub> (SO <sub>4</sub> ) <sub>3</sub> | DTBP                                         | 120        | 41        |

<sup>a</sup> Reaction condition: **1a** (0.2 mmol), DMF (2 mL), catalyst (5 mol%), oxidant (0.5 mmol), 12 h. <sup>b</sup> Cu(OAc)<sub>2</sub>, CuI, CuCl<sub>2</sub>, [(C<sub>6</sub>H<sub>5</sub>)<sub>3</sub>P]<sub>3</sub>RhCl, C<sub>8</sub>H<sub>12</sub>Cl<sub>2</sub>Ru or C<sub>20</sub>H<sub>28</sub>Cl<sub>4</sub>Ru<sub>2</sub> were screened. <sup>c</sup> CHP = Cumyl Hydroperoxide.

## 5. Spectroscopic Data for Imidazoles

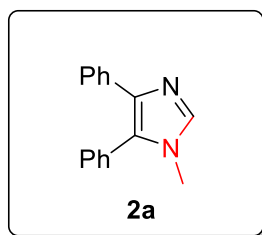

**2a:** Yield 68% (31.8 mg); Yellow solid; mp 141-144 °C;  $^1\text{H}$  NMR (400 MHz,  $\text{CDCl}_3$ )  $\delta$  7.56 (s, 1H), 7.49-7.43 (m, 5H), 7.34-7.31 (m, 2H), 7.22-7.11 (m, 3H), 3.46 (s, 3H).  $^{13}\text{C}$  NMR (100 MHz,  $\text{CDCl}_3$ )  $\delta$  138.2, 137.4, 134.6, 130.6, 130.6, 128.9, 128.9, 128.5, 128.0, 126.6, 126.2, 32.1. HRMS Calcd (ESI)  $m/z$  for  $\text{C}_{16}\text{H}_{14}\text{N}_2$ :  $[\text{M}+\text{Na}]^+$  257.1049. Found: 257.1054.

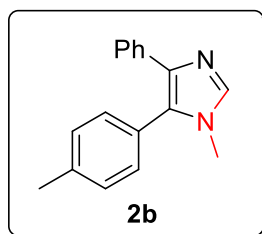

**2b:** Yield 53% (26.3 mg); Yellow solid; mp 113-114 °C;  $^1\text{H}$  NMR (400 MHz,  $\text{CDCl}_3$ )  $\delta$  7.56 (s, 1H), 7.51-7.48 (m, 2H), 7.26-7.18 (m, 6H), 7.15-7.11 (m, 1H), 3.46 (s, 3H), 2.42 (s, 3H).  $^{13}\text{C}$  NMR (100 MHz,  $\text{CDCl}_3$ )  $\delta$  138.5, 138.0, 137.3, 134.7, 130.5, 129.7, 128.8, 128.1, 127.5, 126.5, 126.2, 32.1, 21.3. HRMS Calcd (ESI)  $m/z$  for  $\text{C}_{17}\text{H}_{16}\text{N}_2$ :  $[\text{M}+\text{H}]^+$  249.1386. Found: 249.1389.

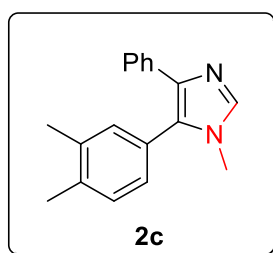

**2c:** Yield 50% (26.2 mg); Yellow solid; mp 110-111 °C;  $^1\text{H}$  NMR (400 MHz,  $\text{CDCl}_3$ )  $\delta$  7.56 (s, 1H), 7.52 (d,  $J = 8.0$  Hz, 2H), 7.22-7.18 (m, 3H), 7.15-7.04 (m, 3H), 3.46 (s, 3H), 2.33 (s, 3H), 2.28 (s, 3H).  $^{13}\text{C}$  NMR (100 MHz,  $\text{CDCl}_3$ )  $\delta$  137.8, 137.2, 137.1, 134.8, 131.6, 130.7, 130.2, 128.9, 128.1, 128.0, 128.0, 126.4, 126.1, 32.1, 19.8, 19.7. HRMS Calcd (ESI)  $m/z$  for  $\text{C}_{18}\text{H}_{18}\text{N}_2$ :  $[\text{M}+\text{Na}]^+$  285.1362. Found: 285.1365.

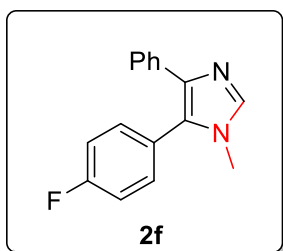

**2f:** Yield 50% (25.2 mg); Yellow solid; mp 142-143 °C;  $^1\text{H}$  NMR (400 MHz,  $\text{CDCl}_3$ )  $\delta$  7.64 (s, 1H), 7.45-7.43 (m, 2H), 7.33-7.29 (m, 2H), 7.24-7.20 (m, 2H), 7.17-7.13 (m, 3H), 3.48 (s, 3H).  $^{13}\text{C}$  NMR (100 MHz,  $\text{CDCl}_3$ )  $\delta$  164.2, 161.7, 138.3, 137.6, 134.1, 132.6 (d,  $J_{\text{CF}} = 8.0$  Hz), 128.2, 126.7, 126.6, 126.4 (d,  $J_{\text{CF}} = 3.0$  Hz), 116.3 (d,  $J_{\text{CF}} = 21.0$  Hz), 32.2 (s). HRMS Calcd (ESI)  $m/z$  for  $\text{C}_{16}\text{H}_{13}\text{FN}_2$ :  $[\text{M}+\text{H}]^+ 253.1136$ . Found: 253.1136.

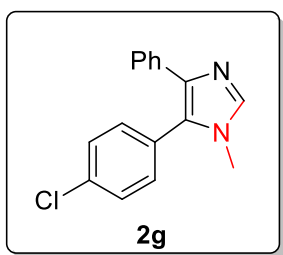

**2g:** Yield 52% (27.9 mg); Yellow solid; mp 154-156 °C;  $^1\text{H}$  NMR (400 MHz,  $\text{CDCl}_3$ )  $\delta$  7.59 (s, 1H), 7.46-7.42 (m, 4H), 7.28-7.16 (m, 5H), 3.48 (s, 3H).  $^{13}\text{C}$  NMR (100 MHz,  $\text{CDCl}_3$ )  $\delta$  138.6, 137.7, 134.7, 134.2, 131.9, 129.3, 129.0, 128.2, 127.6, 126.7, 126.6, 32.2. HRMS Calcd (ESI)  $m/z$  for  $\text{C}_{16}\text{H}_{13}\text{ClN}_2$ :  $[\text{M}+\text{H}]^+ 269.0840$ . Found: 269.0849.

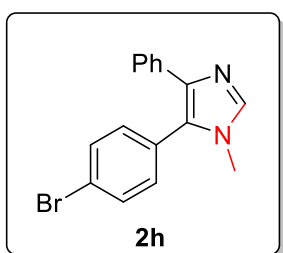

**2h:** Yield 47% (29.3 mg); Yellow solid; mp 152-154 °C;  $^1\text{H}$  NMR (400 MHz,  $\text{CDCl}_3$ )  $\delta$  7.59-7.57 (m, 3H), 7.47-7.45 (m, 2H), 7.25-7.14 (m, 5H), 3.48 (s, 3H).  $^{13}\text{C}$  NMR (100 MHz,  $\text{CDCl}_3$ )  $\delta$  138.7, 137.8, 134.3, 132.3, 132.2, 129.5, 128.2, 127.5, 126.7, 126.6, 122.9, 32.2. HRMS Calcd (ESI)  $m/z$  for  $\text{C}_{16}\text{H}_{13}\text{BrN}_2$ :  $[\text{M}+\text{H}]^+ 313.0335$ . Found: 313.0340.

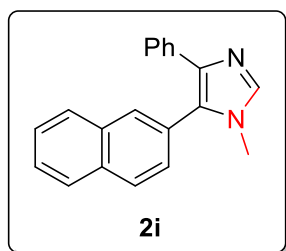

**2i:** Yield 44% (25.0 mg); Brown solid; mp 145-147 °C;  $^1\text{H}$  NMR (400 MHz,  $\text{CDCl}_3$ )  $\delta$  7.92-7.90 (m, 2H), 7.84-7.82 (m, 2H), 7.62 (s, 1H), 7.57-7.50 (m, 4H), 7.40 (d,  $J = 8.0$  Hz, 1H), 7.18-7.11 (m, 3H), 3.52 (s, 3H).  $^{13}\text{C}$  NMR (100 MHz,  $\text{CDCl}_3$ )  $\delta$  138.5, 137.6, 134.6, 133.4, 133.1, 129.9, 128.7, 128.1, 128.1, 128.1, 127.8, 126.7, 126.7, 126.5, 126.4, 32.3. HRMS Calcd (ESI)  $m/z$  for  $\text{C}_{20}\text{H}_{16}\text{N}_2$ :  $[\text{M}+\text{H}]^+$  285.1386. Found: 285.1391.

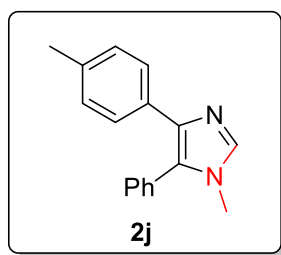

**2j:** Yield 51% (25.3 mg); Yellow solid; mp 106-107 °C;  $^1\text{H}$  NMR (400 MHz,  $\text{CDCl}_3$ )  $\delta$  7.56 (s, 1H), 7.45-7.43 (m, 3H), 7.38-7.32 (m, 4H), 7.01 (d,  $J = 8.0$  Hz, 2H), 3.48 (s, 3H), 2.28 (s, 3H).  $^{13}\text{C}$  NMR (100 MHz,  $\text{CDCl}_3$ )  $\delta$  138.3, 137.3, 135.9, 131.8, 130.7, 130.7, 129.7, 128.9, 128.8, 128.5, 126.5, 32.2, 21.1. HRMS Calcd (ESI)  $m/z$  for  $\text{C}_{17}\text{H}_{16}\text{N}_2$ :  $[\text{M}+\text{Na}]^+$  271.1206. Found: 271.1205.

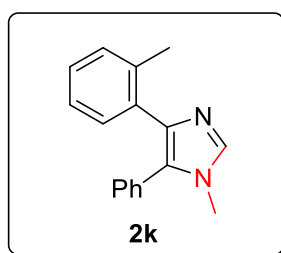

**2k:** Yield 35% (17.4 mg); Yellow solid; mp 49-50 °C;  $^1\text{H}$  NMR (400 MHz,  $\text{CDCl}_3$ )  $\delta$  7.65 (s, 1H), 7.34-7.28 (m, 3H), 7.20-7.11 (m, 5H), 7.09-7.05 (m, 1H), 3.64 (s, 3H), 2.09 (s, 3H).  $^{13}\text{C}$  NMR (100 MHz,  $\text{CDCl}_3$ )  $\delta$  138.5, 138.0, 137.3, 134.7, 130.5, 129.7, 128.9, 128.9, 128.8, 128.1, 127.5, 126.5, 126.2, 32.1, 21.3. HRMS Calcd (ESI)  $m/z$  for  $\text{C}_{17}\text{H}_{16}\text{N}_2$ :  $[\text{M}+\text{Na}]^+$  271.1206. Found: 271.1206.

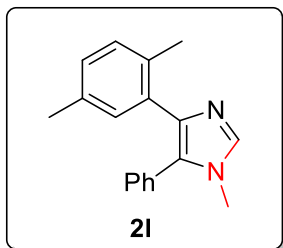

**2l:** Yield 45% (23.6 mg); Yellow oil;  $^1\text{H}$  NMR (400 MHz,  $\text{CDCl}_3$ )  $\delta$  7.63 (s, 1H), 7.33-7.27 (m, 3H), 7.17-7.15 (m, 2H), 7.10 (s, 1H), 6.99-6.94 (m, 2H), 3.63 (s, 3H), 2.23 (s, 3H), 1.94 (s, 3H).  $^{13}\text{C}$  NMR (100 MHz,  $\text{CDCl}_3$ )  $\delta$  139.3, 137.5, 134.5, 134.0, 133.5, 131.5, 130.2, 129.9, 129.6, 128.5, 128.0, 127.6, 125.4, 32.7, 20.8, 19.6. HRMS Calcd (ESI)  $m/z$  for  $\text{C}_{18}\text{H}_{18}\text{N}_2$ :  $[\text{M}+\text{Na}]^+$  285.1362. Found: 285.1359.

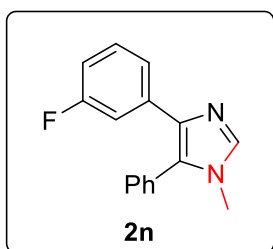

**2n:** Yield 78% (39.3 mg); Yellow solid; mp 90-91 °C;  $^1\text{H}$  NMR (400 MHz,  $\text{CDCl}_3$ )  $\delta$  7.59 (s, 1H), 7.48-7.45 (m, 3H), 7.34-7.31 (m, 2H), 7.25-7.19 (m, 2H), 7.16-7.10 (m, 1H), 6.84-6.79 (m, 1H), 3.47 (s, 3H).  $^{13}\text{C}$  NMR (100 MHz,  $\text{CDCl}_3$ )  $\delta$  164.0, 161.6, 137.4, 136.9 (d,  $J_{\text{CF}} = 2.0$  Hz), 136.8 (d,  $J_{\text{CF}} = 9.0$  Hz), 130.5, 130.1, 129.5 (d,  $J_{\text{CF}} = 9.0$  Hz), 129.1, 128.9, 122.0 (d,  $J_{\text{CF}} = 2.0$  Hz), 113.3, 113.1 (d,  $J_{\text{CF}} = 3.0$  Hz), 112.9, 32.12. HRMS Calcd (ESI)  $m/z$  for  $\text{C}_{16}\text{H}_{13}\text{FN}_2$ :  $[\text{M}+\text{Na}]^+$  275.0955. Found: 275.0966.

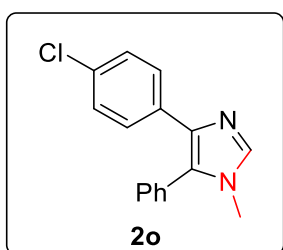

**2o:** Yield 56% (30.0 mg); Yellow solid; mp 64-65 °C;  $^1\text{H}$  NMR (400 MHz,  $\text{CDCl}_3$ )  $\delta$  7.60 (s, 1H), 7.46 (dd,  $J = 8.0, 4.0$  Hz, 3H), 7.41 (d,  $J = 8.0$  Hz, 2H), 7.32-7.30 (m, 2H), 7.17 (d,  $J = 8.0$  Hz, 2H), 3.48 (s, 3H).  $^{13}\text{C}$  NMR (100 MHz,  $\text{CDCl}_3$ )  $\delta$  137.5, 137.1, 133.0, 132.1, 130.6, 130.2, 129.1, 128.9, 128.3, 127.9, 32.2. HRMS Calcd (ESI)  $m/z$  for  $\text{C}_{16}\text{H}_{13}\text{ClN}_2$ :  $[\text{M}+\text{H}]^+$  269.0840. Found: 269.0846.

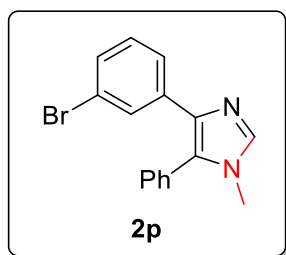

**2p:** Yield 63% (39.3 mg); Yellow solid; mp 100-102 °C;  $^1\text{H}$  NMR (400 MHz,  $\text{CDCl}_3$ )  $\delta$  7.72 (t,  $J = 4.0$  Hz, 1H), 7.56 (s, 1H), 7.48-7.45 (m, 3H), 7.33-7.29 (m, 3H), 7.24 (m, 1H), 7.02 (t,  $J = 8.0$  Hz, 1H), 3.48 (s, 3H).  $^{13}\text{C}$  NMR (100 MHz,  $\text{CDCl}_3$ )  $\delta$  137.5, 136.8, 136.8, 130.6, 130.1, 129.6, 129.5, 129.2, 129.1, 128.9, 124.9, 122.4, 32.2. HRMS Calcd (ESI)  $m/z$  for  $\text{C}_{16}\text{H}_{13}\text{BrN}_2$ :  $[\text{M}+\text{Na}]^+ 335.0154$ . Found: 335.0151.

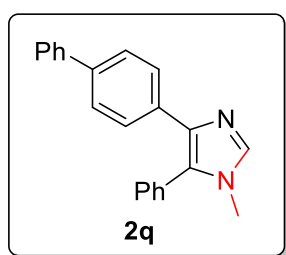

**2q:** Yield 35% (21.7 mg); Yellow solid; mp 124-126 °C;  $^1\text{H}$  NMR (400 MHz,  $\text{CDCl}_3$ )  $\delta$  7.59 (s, 1H), 7.56 (d,  $J = 8.0$  Hz, 4H), 7.47-7.44 (m, 5H), 7.40-7.36 (m, 4H), 7.29 (d,  $J = 8.0$  Hz, 1H), 3.49 (s, 3H).  $^{13}\text{C}$  NMR (100 MHz,  $\text{CDCl}_3$ )  $\delta$  140.9, 138.9, 137.5, 133.7, 131.0, 130.7, 130.6, 128.7, 128.6, 128.2, 127.6, 127.0, 126.9, 126.9, 126.8, 126.8, 32.2. HRMS Calcd (ESI)  $m/z$  for  $\text{C}_{22}\text{H}_{18}\text{N}_2$ :  $[\text{M}+\text{Na}]^+ 333.1362$ . Found: 333.1362.

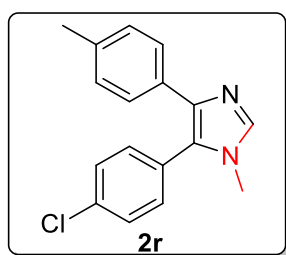

**2r:** Yield 34% (19.2 mg); Yellow solid; mp 96-97 °C;  $^1\text{H}$  NMR (400 MHz,  $\text{CDCl}_3$ )  $\delta$  7.59 (s, 1H), 7.43-7.41 (m, 2H), 7.33 (d,  $J = 8.0$  Hz, 2H), 7.27 (s, 1H), 7.25 (s, 1H), 7.03 (d,  $J = 8.0$  Hz, 2H), 3.48 (s, 3H), 2.29 (s, 3H).  $^{13}\text{C}$  NMR (100 MHz,  $\text{CDCl}_3$ )  $\delta$  138.7, 137.7, 136.3, 134.7, 132.0, 131.3, 129.3, 129.1, 129.0, 127.2, 126.7, 32.2, 21.1. HRMS Calcd (ESI)  $m/z$  for  $\text{C}_{17}\text{H}_{15}\text{ClN}_2$ :  $[\text{M}+\text{Na}]^+ 305.0816$ . Found: 305.0811.



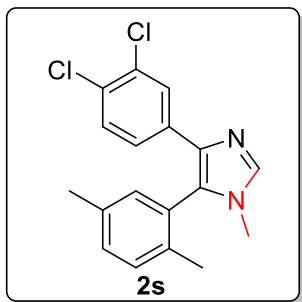

**2s:** Yield 35% (23.1 mg); Yellow solid; mp 45-46 °C;  $^1\text{H}$  NMR (400 MHz,  $\text{CDCl}_3$ )  $\delta$  7.68 (d,  $J = 2.0$  Hz, 1H), 7.58 (s, 1H), 7.24-7.19 (m, 3H), 7.15 (dd,  $J = 8.0, 4.0$  Hz, 1H), 7.03 (s, 1H), 3.36 (s, 3H), 2.36 (s, 3H), 1.99 (s, 3H).  $^{13}\text{C}$  NMR (100 MHz,  $\text{CDCl}_3$ )  $\delta$  137.3, 136.3, 135.6, 135.3, 135.1, 132.3, 131.4, 130.7, 130.5, 130.1, 129.6, 129.3, 129.1, 127.3, 124.4. HRMS Calcd (ESI)  $m/z$  for  $\text{C}_{18}\text{H}_{16}\text{Cl}_2\text{N}_2$ :  $[\text{M}+\text{Na}]^+$  353.0583. Found: 353.0588.

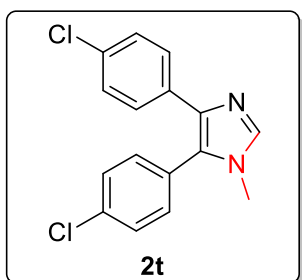

**2t:** Yield 57% (34.4 mg); Yellow solid; mp 150-151 °C;  $^1\text{H}$  NMR (400 MHz,  $\text{CDCl}_3$ )  $\delta$  7.61 (s, 1H), 7.44 (d,  $J = 8.0$  Hz, 2H), 7.38 (d,  $J = 8.0$  Hz, 2H), 7.24 (s, 2H), 7.19 (d,  $J = 8.0$  Hz, 2H), 3.49 (s, 3H).  $^{13}\text{C}$  NMR (100 MHz,  $\text{CDCl}_3$ )  $\delta$  137.9, 135.0, 132.7, 132.3, 131.9, 131.2, 129.5, 128.6, 128.5, 128.4, 127.9, 32.2. HRMS Calcd (ESI)  $m/z$  for  $\text{C}_{16}\text{H}_{12}\text{Cl}_2\text{N}_2$ :  $[\text{M}+\text{H}]^+$  303.0450. Found: 303.0457.

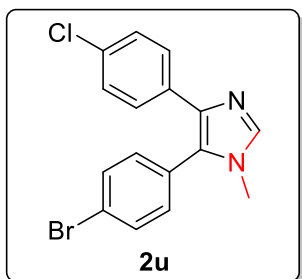

**2u:** Yield 60% (41.5 mg); Yellow solid; mp 144-145 °C;  $^1\text{H}$  NMR (400 MHz,  $\text{CDCl}_3$ )  $\delta$  7.60 (d,  $J = 8.0$  Hz, 2H), 7.57 (s, 1H), 7.38 (d,  $J = 8.0$  Hz, 2H), 7.20-7.18 (m, 4H), 3.48 (s, 3H).  $^{13}\text{C}$  NMR (100 MHz,  $\text{CDCl}_3$ )  $\delta$  137.9, 132.8, 132.4, 132.4, 132.4, 132.1, 129.2, 128.4, 127.9, 123.2, 32.2. HRMS Calcd (ESI)  $m/z$  for  $\text{C}_{16}\text{H}_{12}\text{BrClN}_2$ :  $[\text{M}+\text{H}]^+$

346.9945. Found: 346.9954.

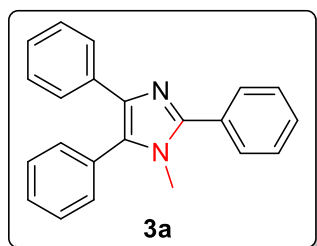

**3a:** Yield 82% (51.1 mg); White solid; mp 137-138 °C;  $^1\text{H}$  NMR (400 MHz,  $\text{CDCl}_3$ )  $\delta$  7.77 (d,  $J = 8.0$  Hz, 2H), 7.60 (d,  $J = 8.0$  Hz, 2H), 7.52-7.41 (m, 8H), 7.25-7.21 (m, 2H), 7.18-7.14 (m, 1H), 3.50 (s, 3H).  $^{13}\text{C}$  NMR (100 MHz,  $\text{CDCl}_3$ )  $\delta$  147.75, 137.64, 134.60, 131.13, 130.82, 130.35, 128.93, 128.52, 127.95, 126.84, 126.18, 33.01. HRMS Calcd (ESI)  $m/z$  for  $\text{C}_{22}\text{H}_{18}\text{N}_2$ :  $[\text{M}+\text{Na}]^+ 333.1362$ . Found: 333.1356.

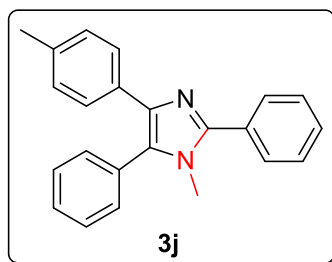

**3j:** Yield 63% (40.8 mg); Yellow solid; mp 122-123 °C;  $^1\text{H}$  NMR (400 MHz,  $\text{CDCl}_3$ )  $\delta$  7.75 (d,  $J = 8.0$  Hz, 2H), 7.51-7.41 (m, 10H), 7.03 (d,  $J = 8.0$  Hz, 2H), 3.50 (s, 3H), 2.29 (s, 3H).  $^{13}\text{C}$  NMR (100 MHz,  $\text{CDCl}_3$ )  $\delta$  147.73, 137.81, 135.84, 131.74, 131.36, 130.89, 130.00, 129.73, 129.17, 128.34, 126.86, 33.09, 21.13. HRMS Calcd (ESI)  $m/z$  for  $\text{C}_{23}\text{H}_{20}\text{N}_2$ :  $[\text{M}+\text{H}]^+ 325.1699$ . Found: 325.1702.

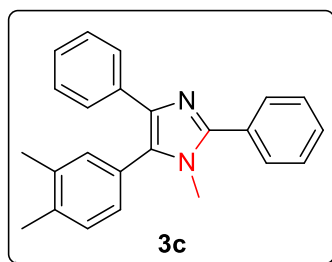

**3c:** Yield 60% (51.1 mg); Yellow solid; mp 87-89 °C;  $^1\text{H}$  NMR (400 MHz,  $\text{CDCl}_3$ )  $\delta$  7.75 (d,  $J = 8.0$  Hz, 2H), 7.60 (d,  $J = 8.0$  Hz, 2H), 7.51-7.47 (m, 2H), 7.45-7.42 (m, 1H), 7.24-7.19 (m, 4H), 7.15-7.14 (m, 2H), 3.49 (s, 3H), 2.35 (s, 3H), 2.31 (s, 3H).  $^{13}\text{C}$  NMR (100 MHz,  $\text{CDCl}_3$ )  $\delta$  147.56, 137.44, 137.01, 134.72, 131.78, 130.98, 130.65, 130.23, 129.05, 128.49, 127.97, 126.83, 126.12, 33.04, 19.72. HRMS Calcd

(ESI) m/z for C<sub>24</sub>H<sub>22</sub>N<sub>2</sub>: [M+Na]<sup>+</sup> 361.1675. Found: 361.1676.

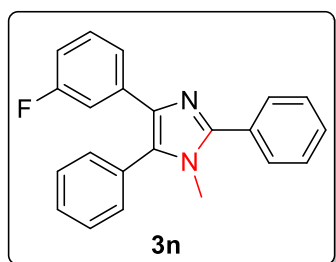

**3n:** Yield 61% (40.0 mg); Yellow solid; mp 120-121 °C; <sup>1</sup>H NMR (400 MHz, CDCl<sub>3</sub>) δ 7.76-7.73 (m, 2H), 7.52-7.40 (m, 8H), 7.31-7.28 (m, 2H), 7.17-7.12 (m, 1H), 6.85-6.80 (m, 1H), 3.50 (s, 3H). <sup>13</sup>C NMR (100 MHz, CDCl<sub>3</sub>) δ 164.0, 161.6, 147.9, 137.0 (d, *J* = 8.0 Hz), 136.5 (d, *J* = 3.0 Hz), 130.9, 130.8, 130.8, 129.4, 129.3, 129.1, 129.0, 128.9 (d, *J* = 2.0 Hz), 128.6, 122.3 (d, *J* = 3.0 Hz), 113.6 (d, *J* = 22.0 Hz), 113.1 (d, *J* = 21.0 Hz), 33.1. HRMS Calcd (ESI) m/z for C<sub>22</sub>H<sub>17</sub>FN<sub>2</sub>: [M+Na]<sup>+</sup> 351.1268. Found: 351.1264.

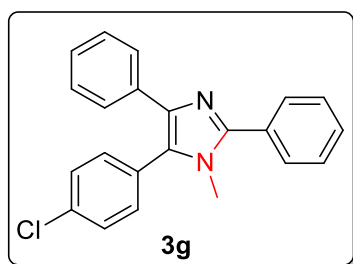

**3g:** Yield 70% (48.2 mg); White solid; mp 166-168 °C; <sup>1</sup>H NMR (400 MHz, CDCl<sub>3</sub>) δ 7.74 (d, *J* = 8.0 Hz, 2H), 7.55-7.44 (m, 7H), 7.36 (d, *J* = 8.0 Hz, 2H), 7.23 (d, *J* = 8.0 Hz, 2H), 7.19-7.15 (m, 1H), 3.51 (s, 3H). <sup>13</sup>C NMR (100 MHz, CDCl<sub>3</sub>) δ 148.25, 138.16, 134.67, 134.28, 132.15, 130.69, 129.90, 129.62, 129.35, 128.97, 128.58, 128.15, 127.06, 126.55, 33.15. HRMS Calcd (ESI) m/z for C<sub>22</sub>H<sub>17</sub>ClN<sub>2</sub>: [M+Na]<sup>+</sup> 367.0973. Found: 361.0972.

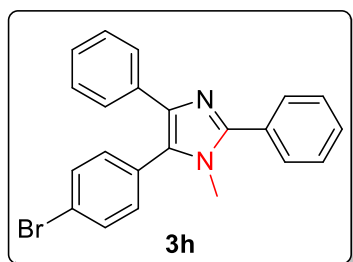

**3h:** Yield 62% (48.1 mg); Yellow solid; mp 165-166 °C; <sup>1</sup>H NMR (400 MHz, CDCl<sub>3</sub>) δ 7.70 (d, *J* = 8.0 Hz, 2H), 7.57 (d, *J* = 8.0 Hz, 2H), 7.51-7.40 (m, 6H), 7.24-7.13 (m,

4H), 3.46 (s, 3H).  $^{13}\text{C}$  NMR (100 MHz,  $\text{CDCl}_3$ )  $\delta$  148.30, 138.14, 134.20, 132.35, 130.86, 129.98, 128.99, 128.57, 128.16, 127.10, 126.59, 122.88, 33.17. HRMS Calcd (ESI)  $m/z$  for  $\text{C}_{22}\text{H}_{17}\text{BrN}_2$ :  $[\text{M}+\text{H}]^+$  389.0648. Found: 389.0651.

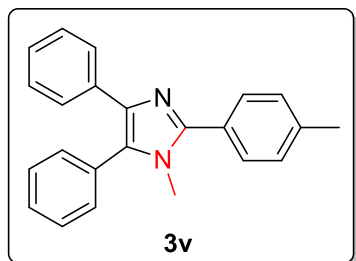

**3v:** Yield 65% (42.1 mg); Yellow solid; mp 155-156 °C;  $^1\text{H}$  NMR (400 MHz,  $\text{CDCl}_3$ )  $\delta$  7.64 (d,  $J = 8.0$  Hz, 2H), 7.56 (d,  $J = 8.0$  Hz, 2H), 7.51-7.38 (m, 5H), 7.30 (d,  $J = 8.0$  Hz, 2H), 7.18 (m, 3H), 3.49 (s, 3H), 2.43 (s, 3H).  $^{13}\text{C}$  NMR (100 MHz,  $\text{CDCl}_3$ )  $\delta$  147.97, 138.64, 137.56, 134.67, 131.28, 130.84, 130.24, 129.20, 128.93, 128.45, 128.01, 126.93, 126.20, 33.08, 21.33. HRMS Calcd (ESI)  $m/z$  for  $\text{C}_{23}\text{H}_{20}\text{N}_2$ :  $[\text{M}+\text{Na}]^+$  347.1516. Found: 347.1516.

## 6. Appendix (Copies of $^1\text{H}$ and $^{13}\text{C}$ NMR Spectra)

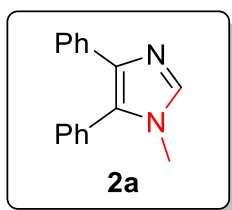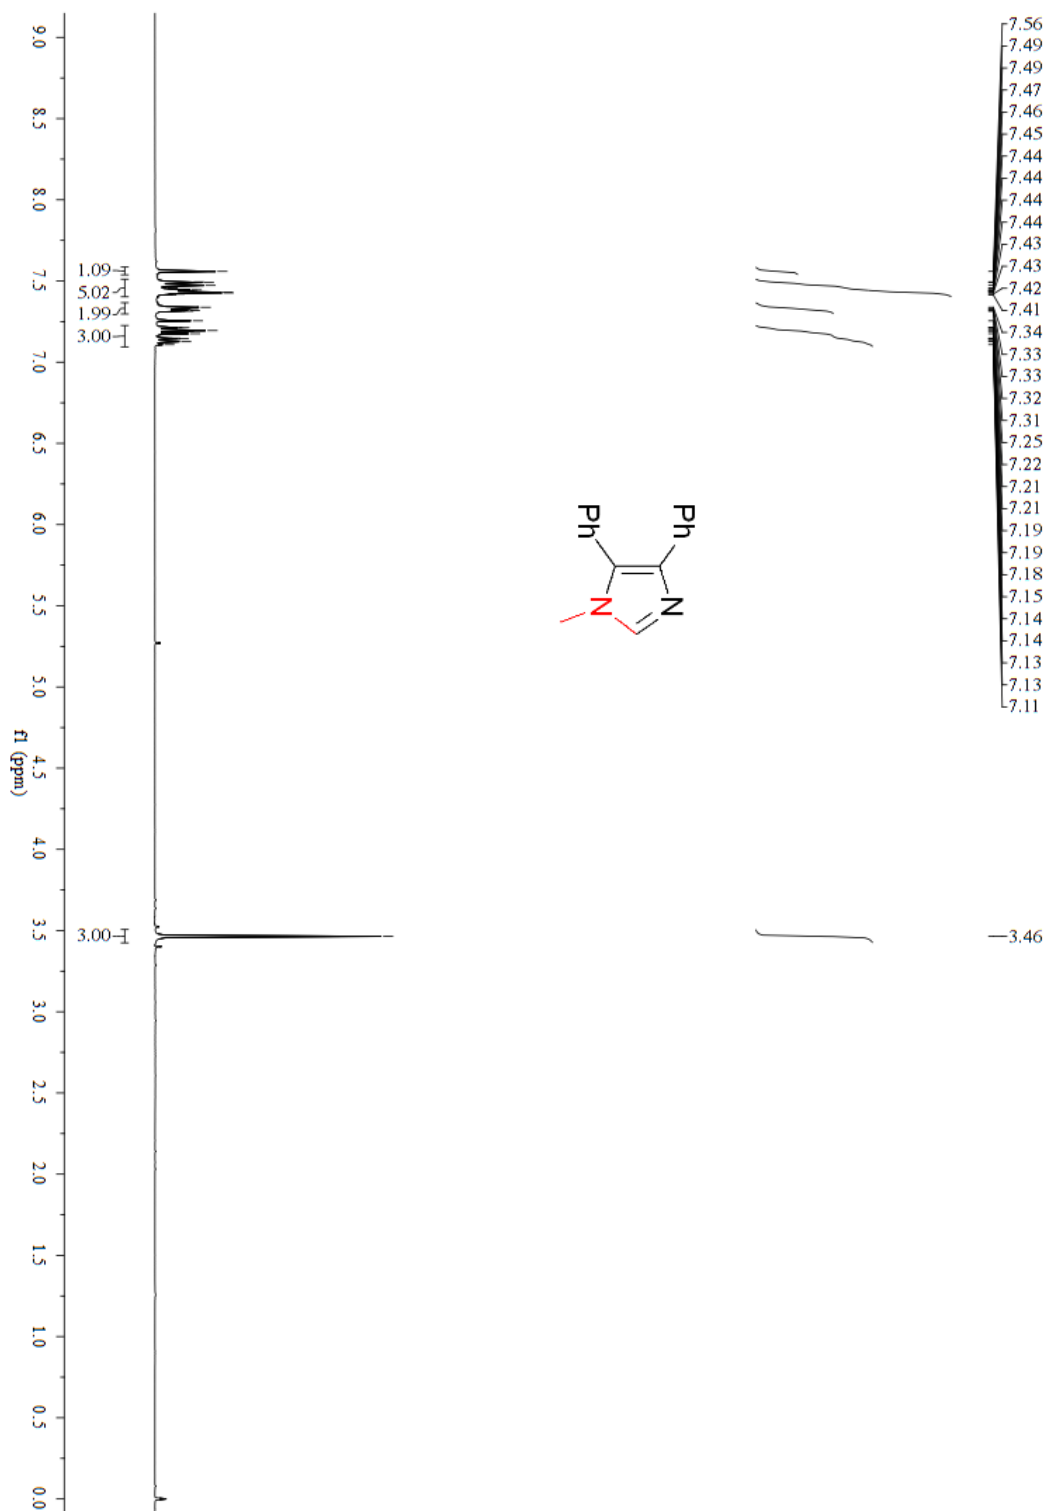

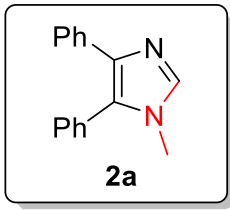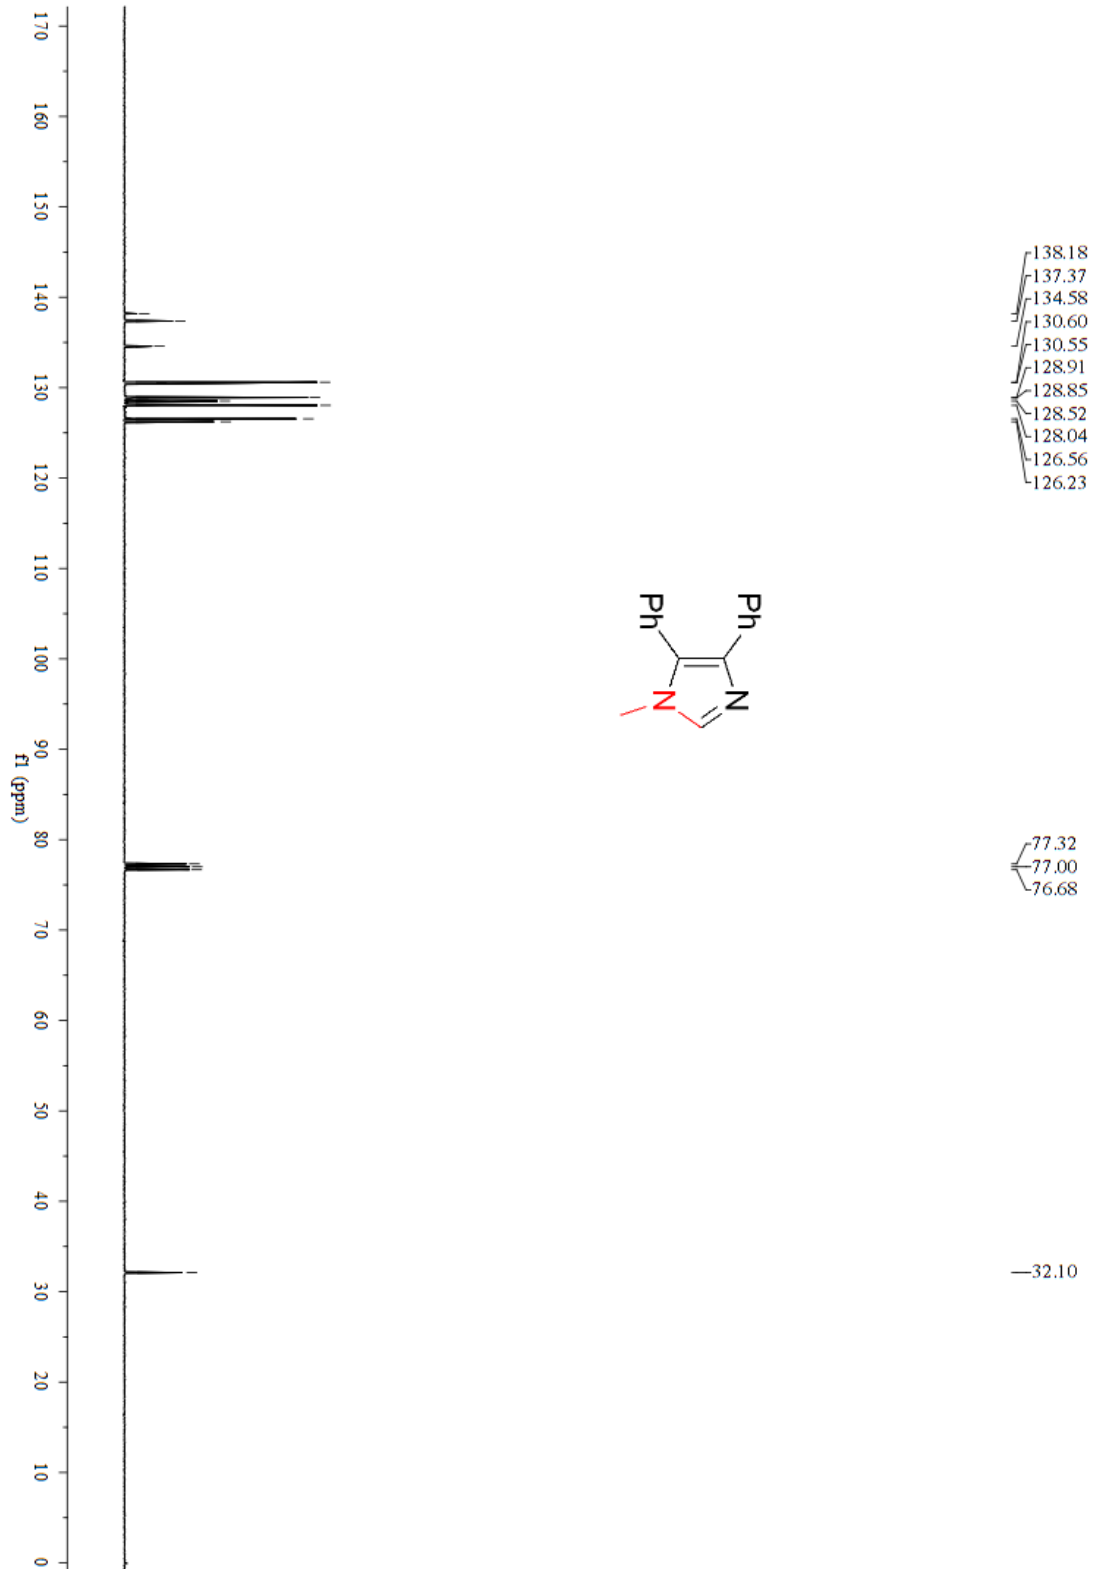

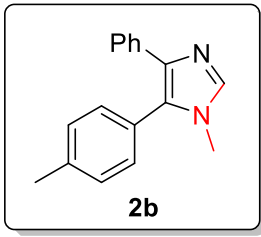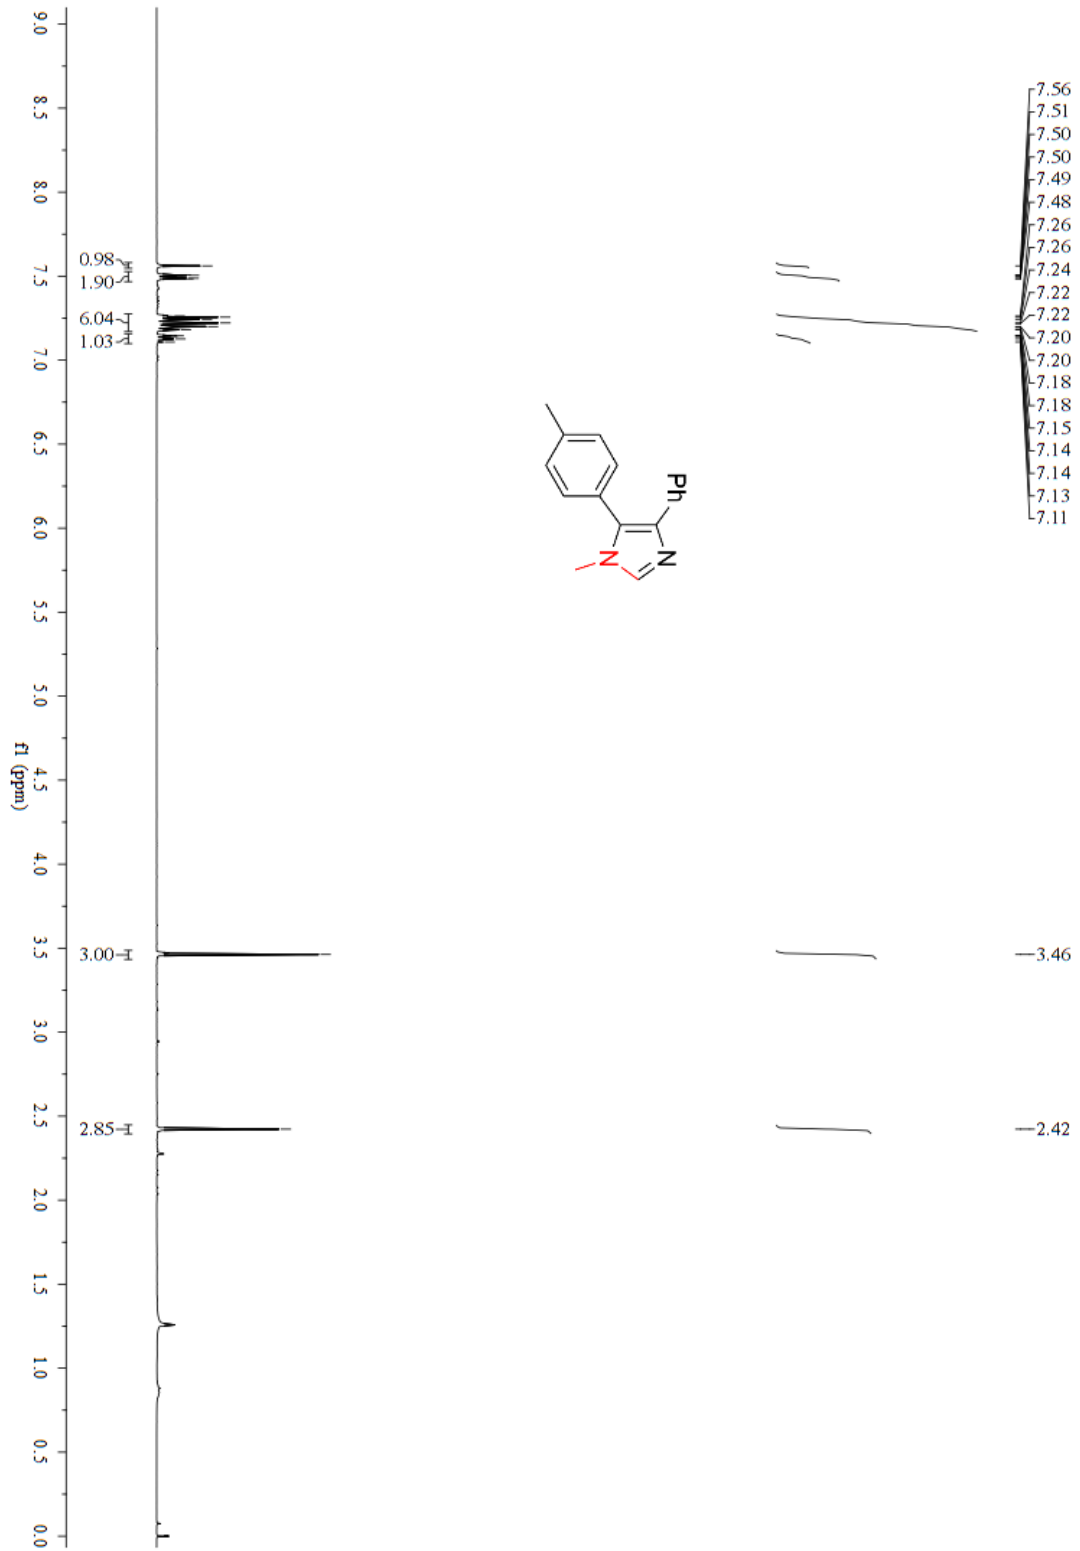

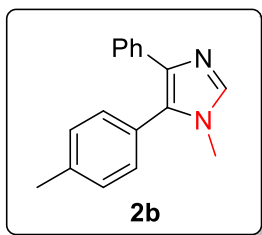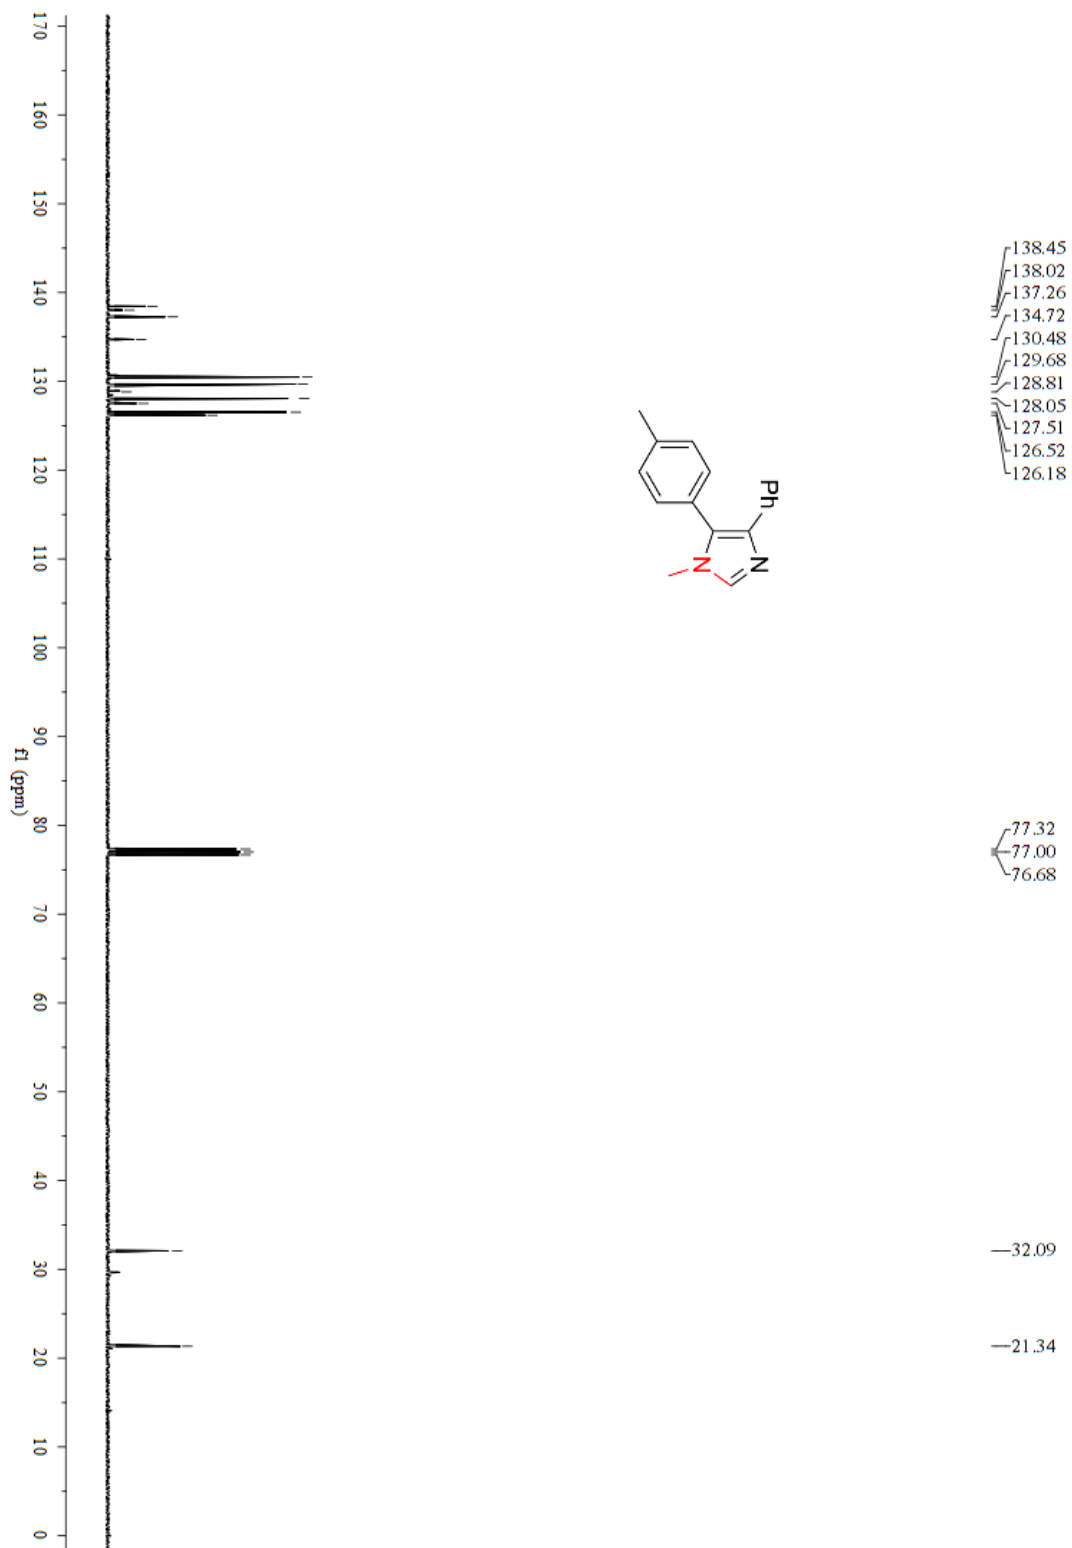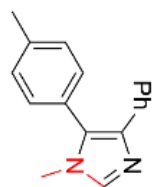



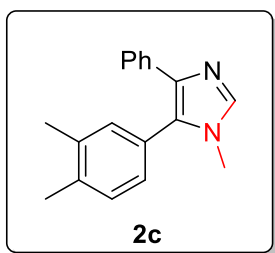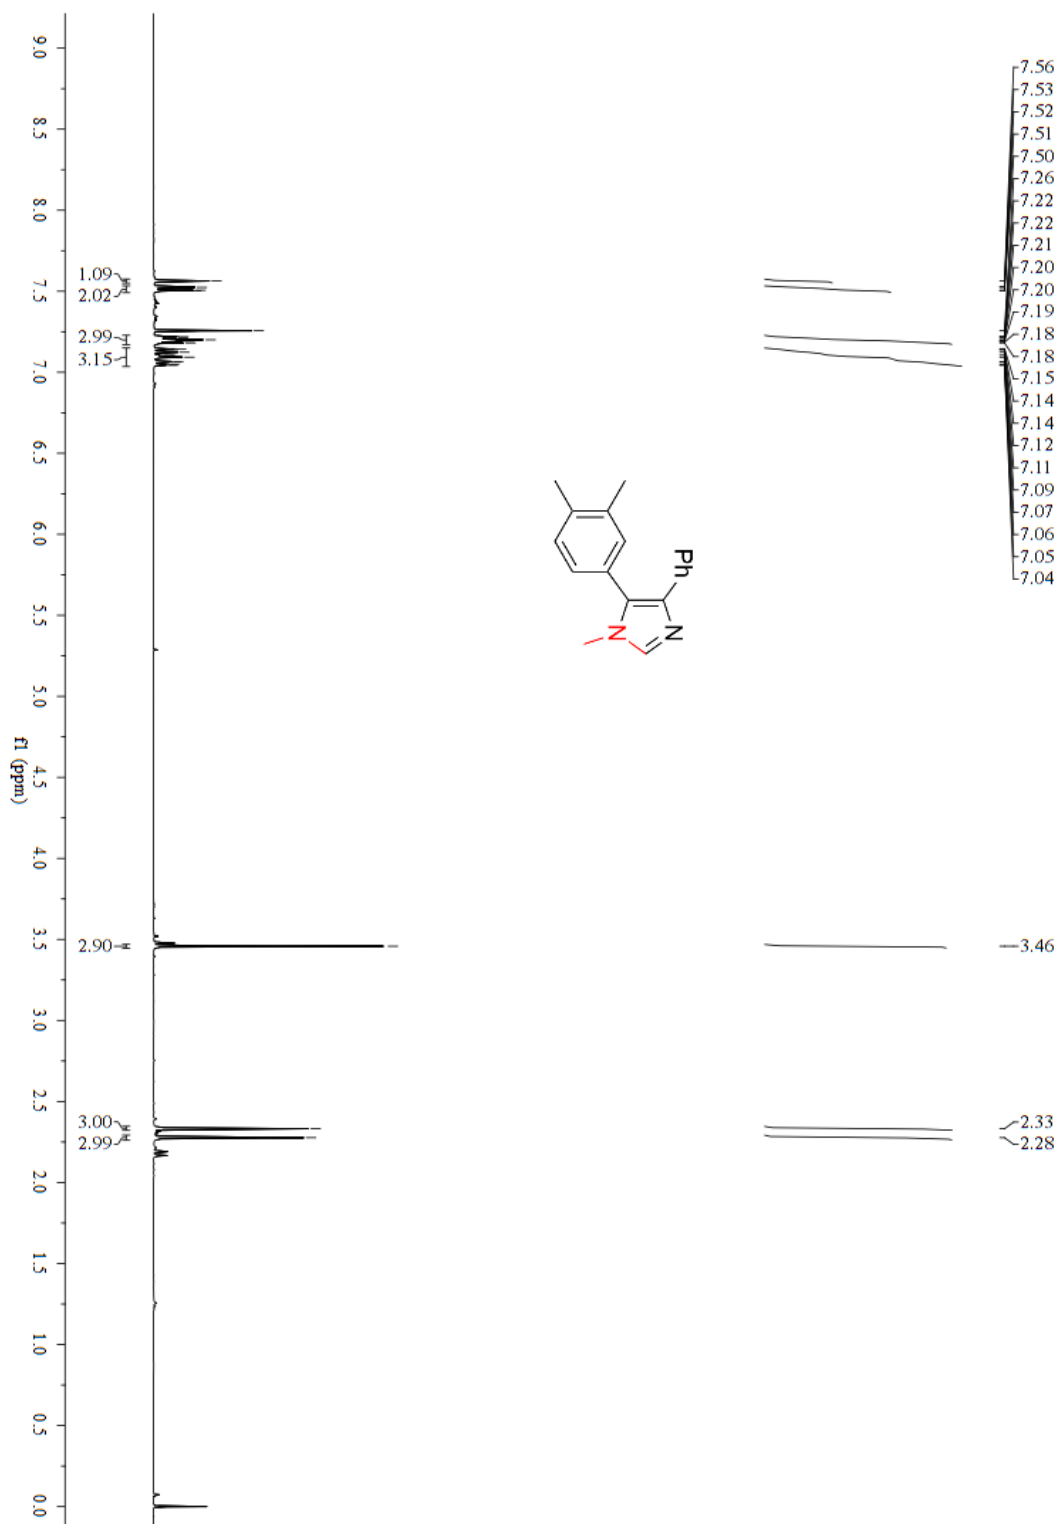

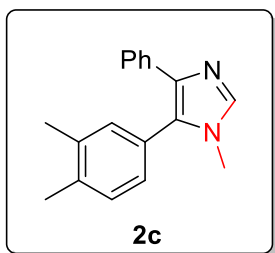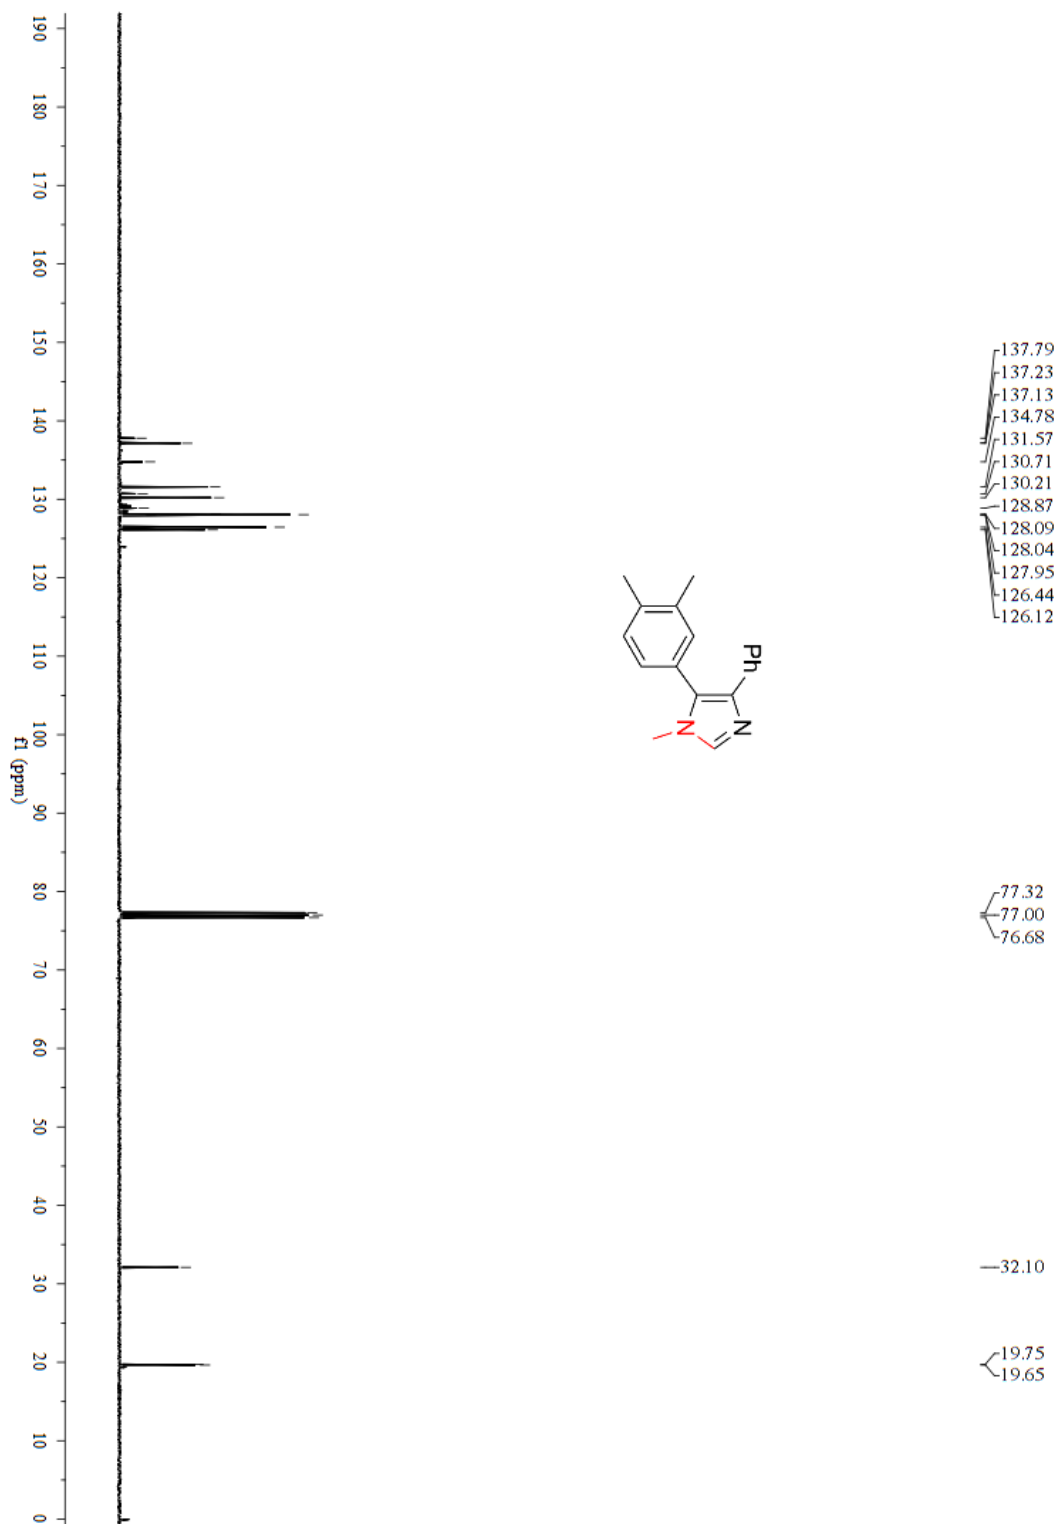

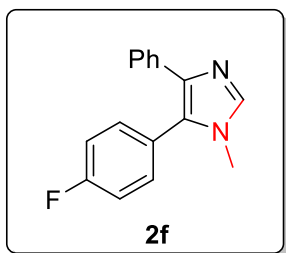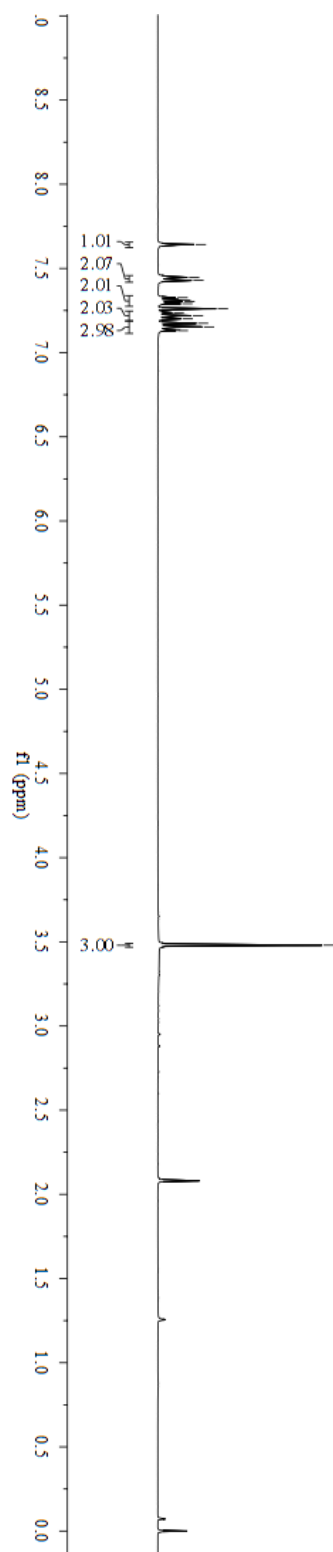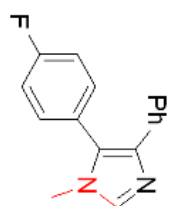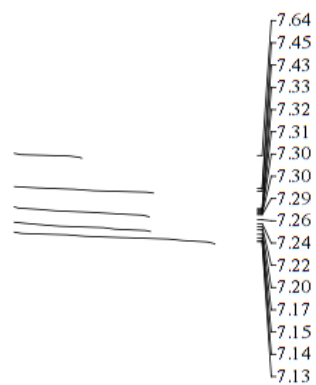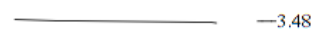

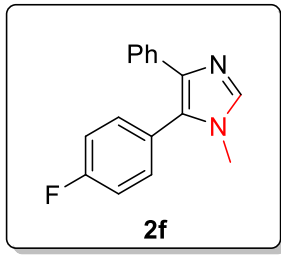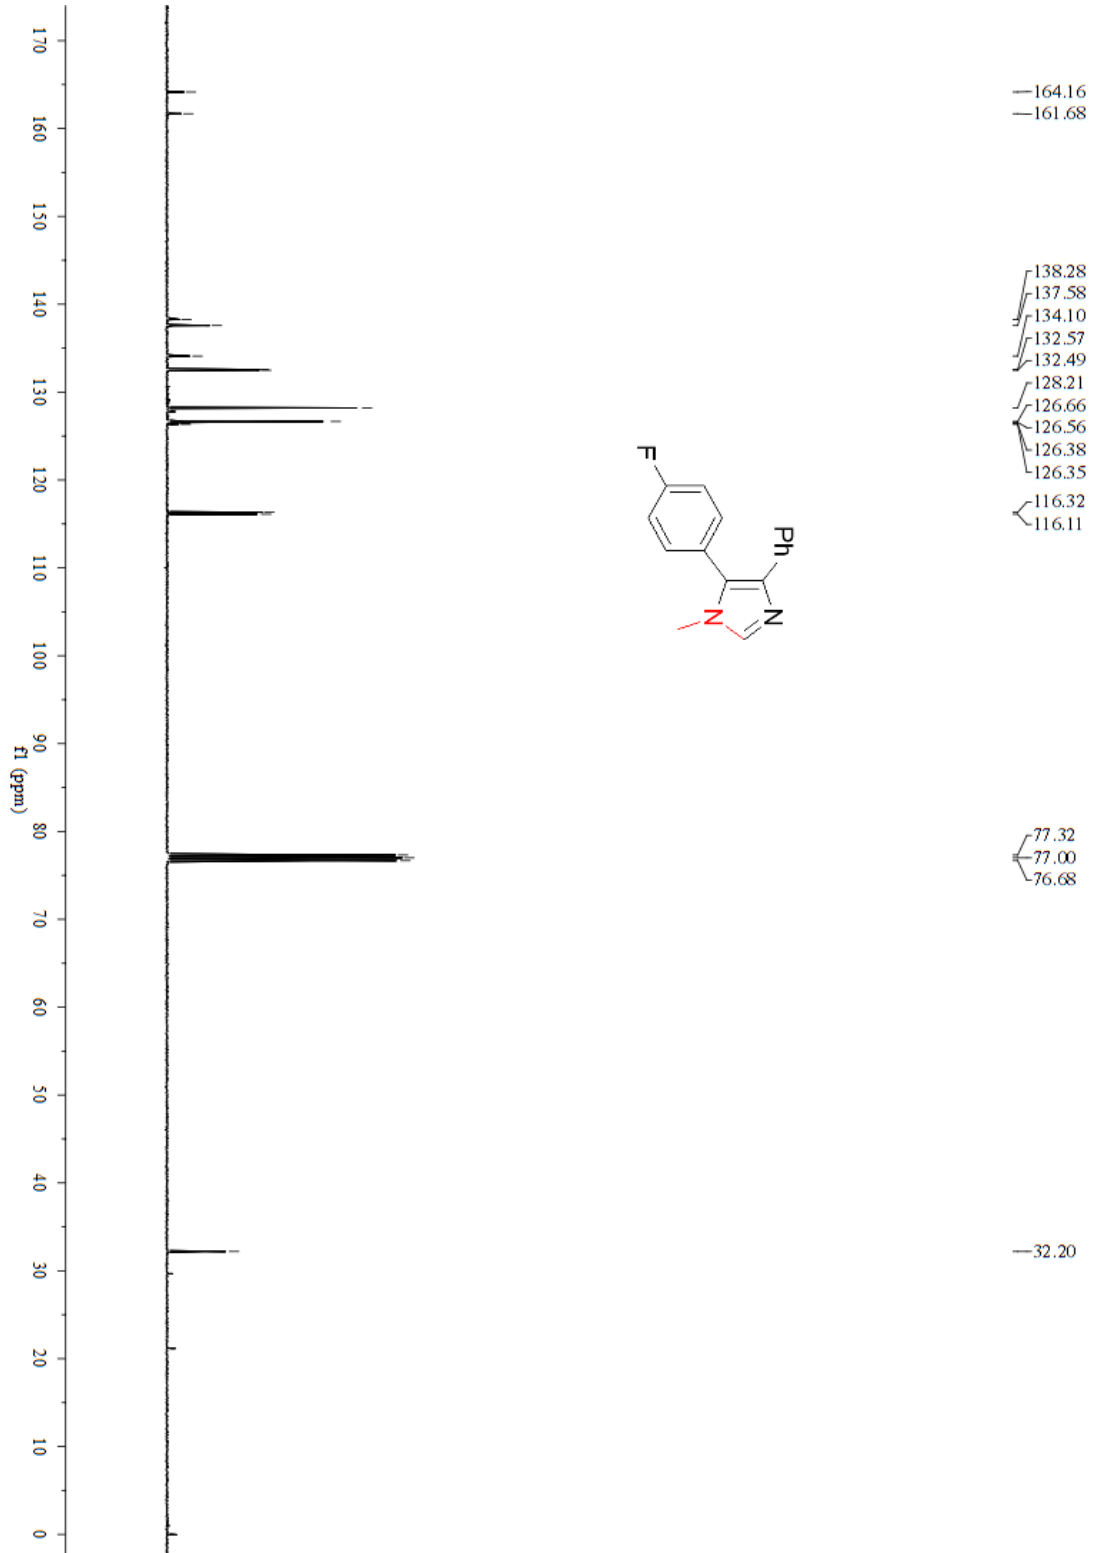

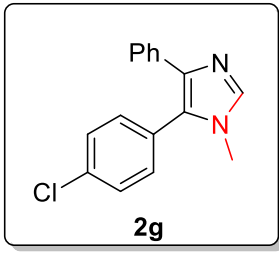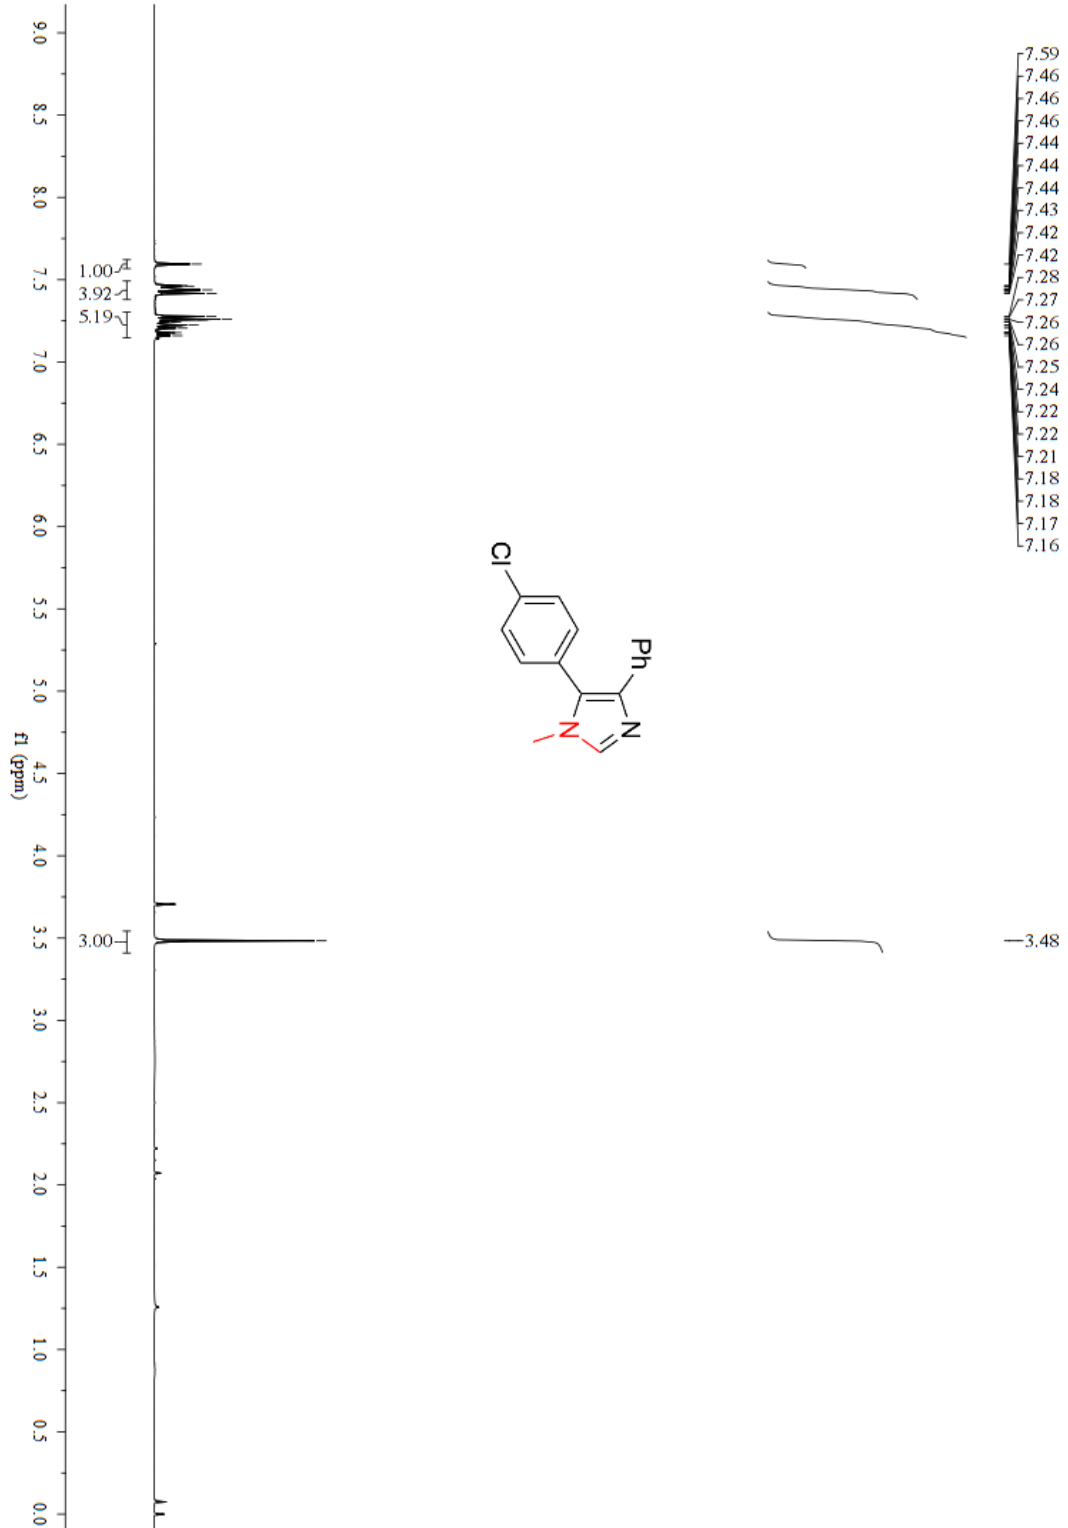

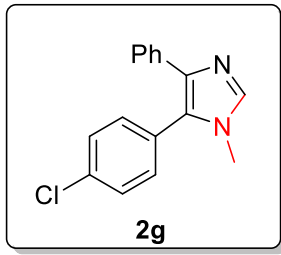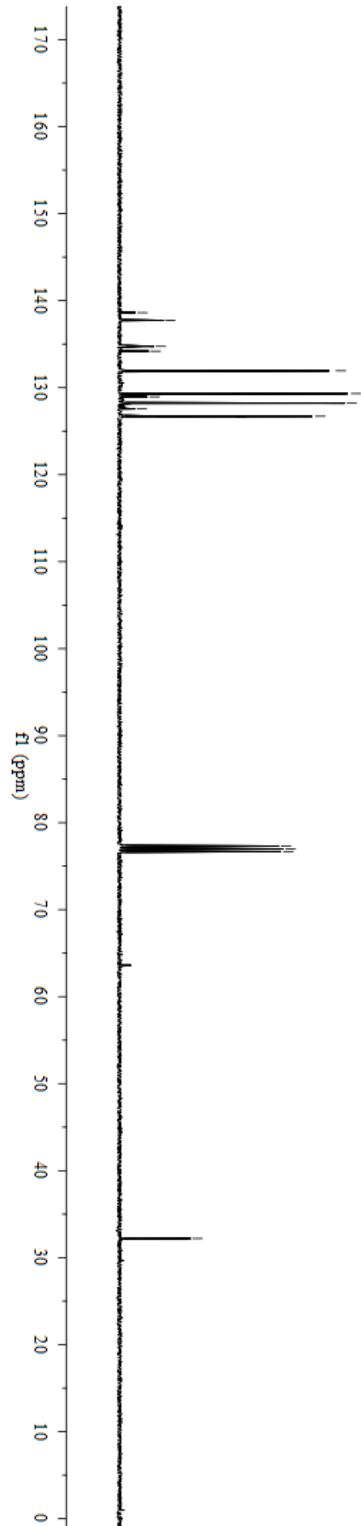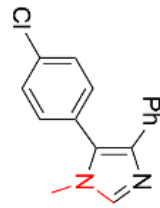

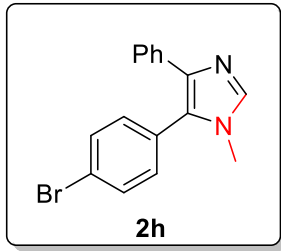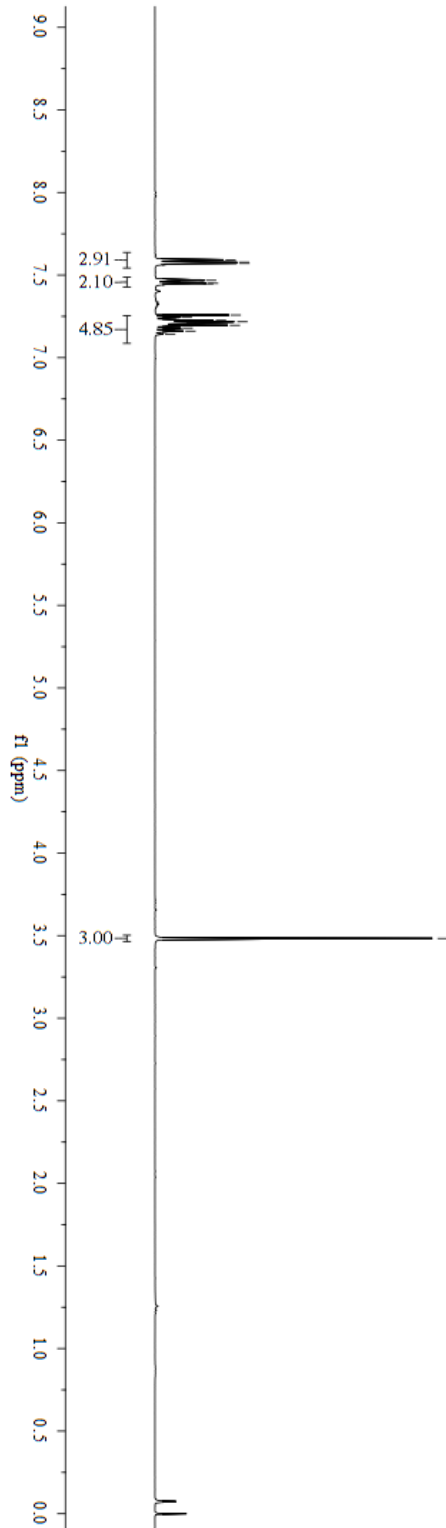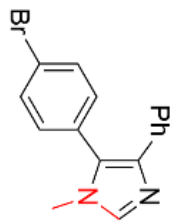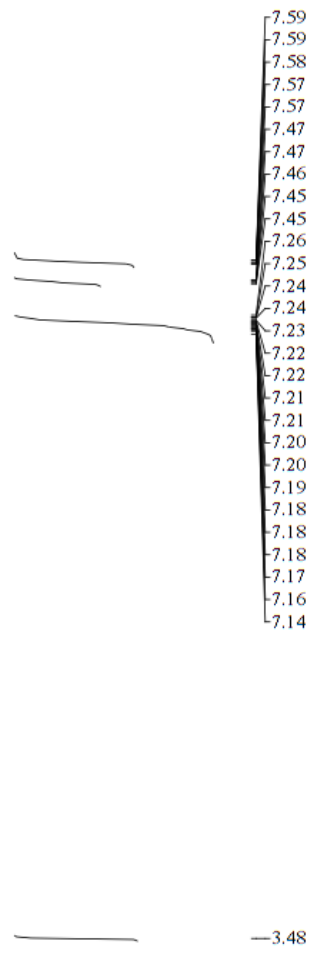

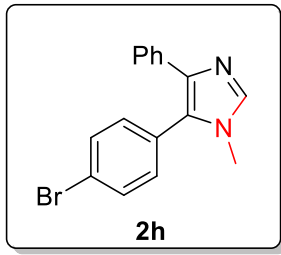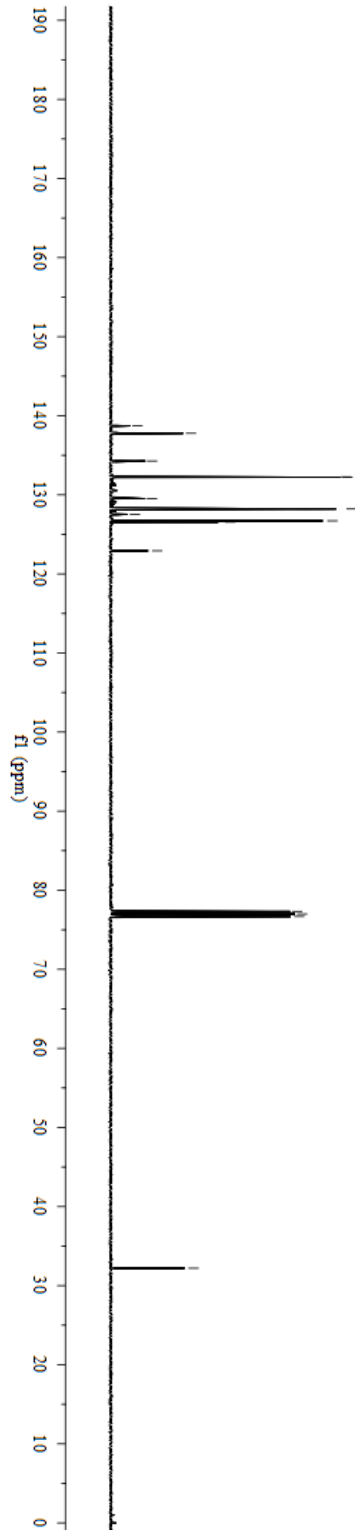

138.72  
137.78  
134.28  
132.27  
132.22  
129.51  
128.21  
127.54  
126.71  
126.56  
122.92

77.32  
77.00  
76.68

32.20

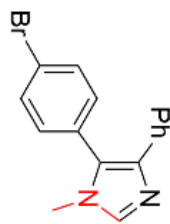



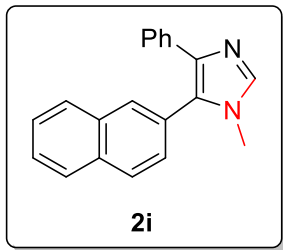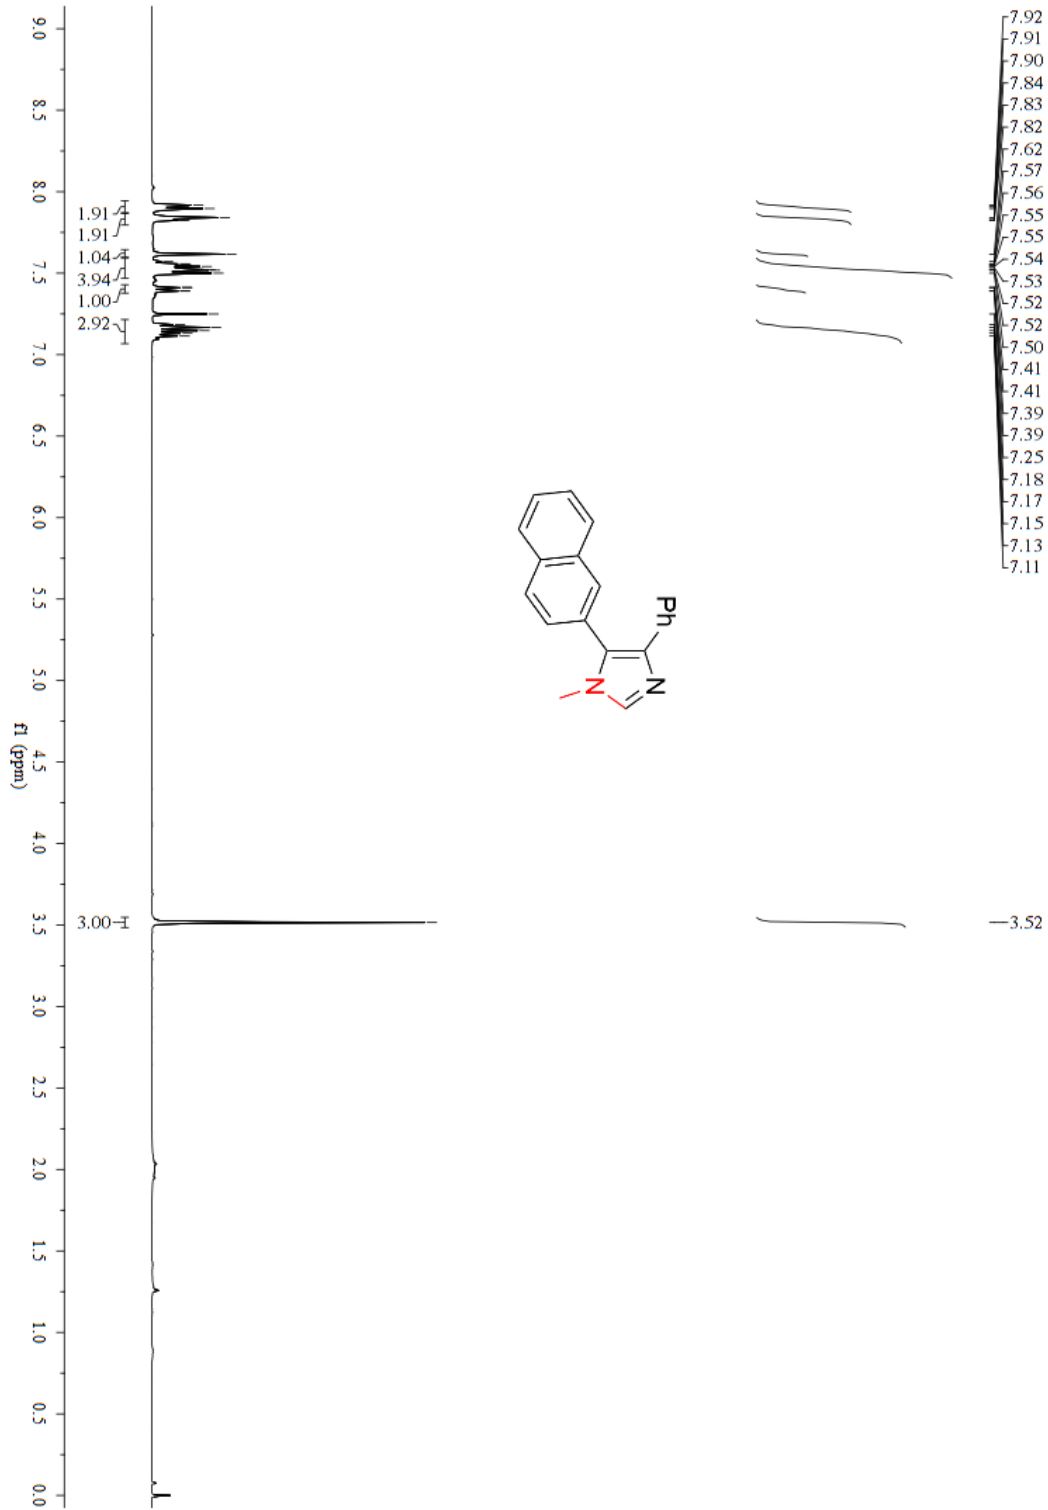

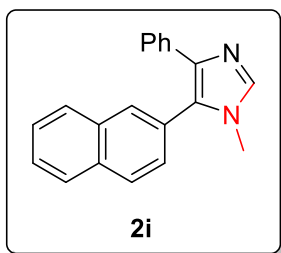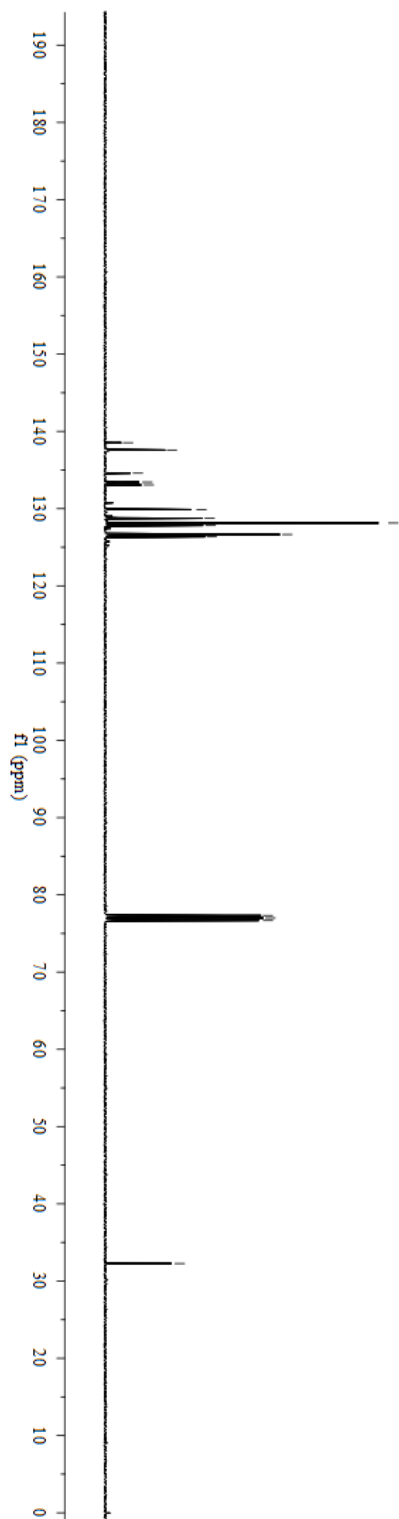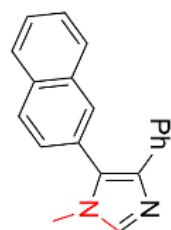

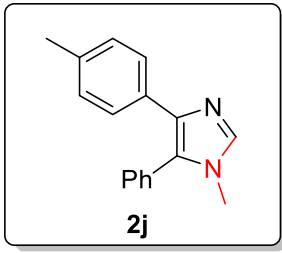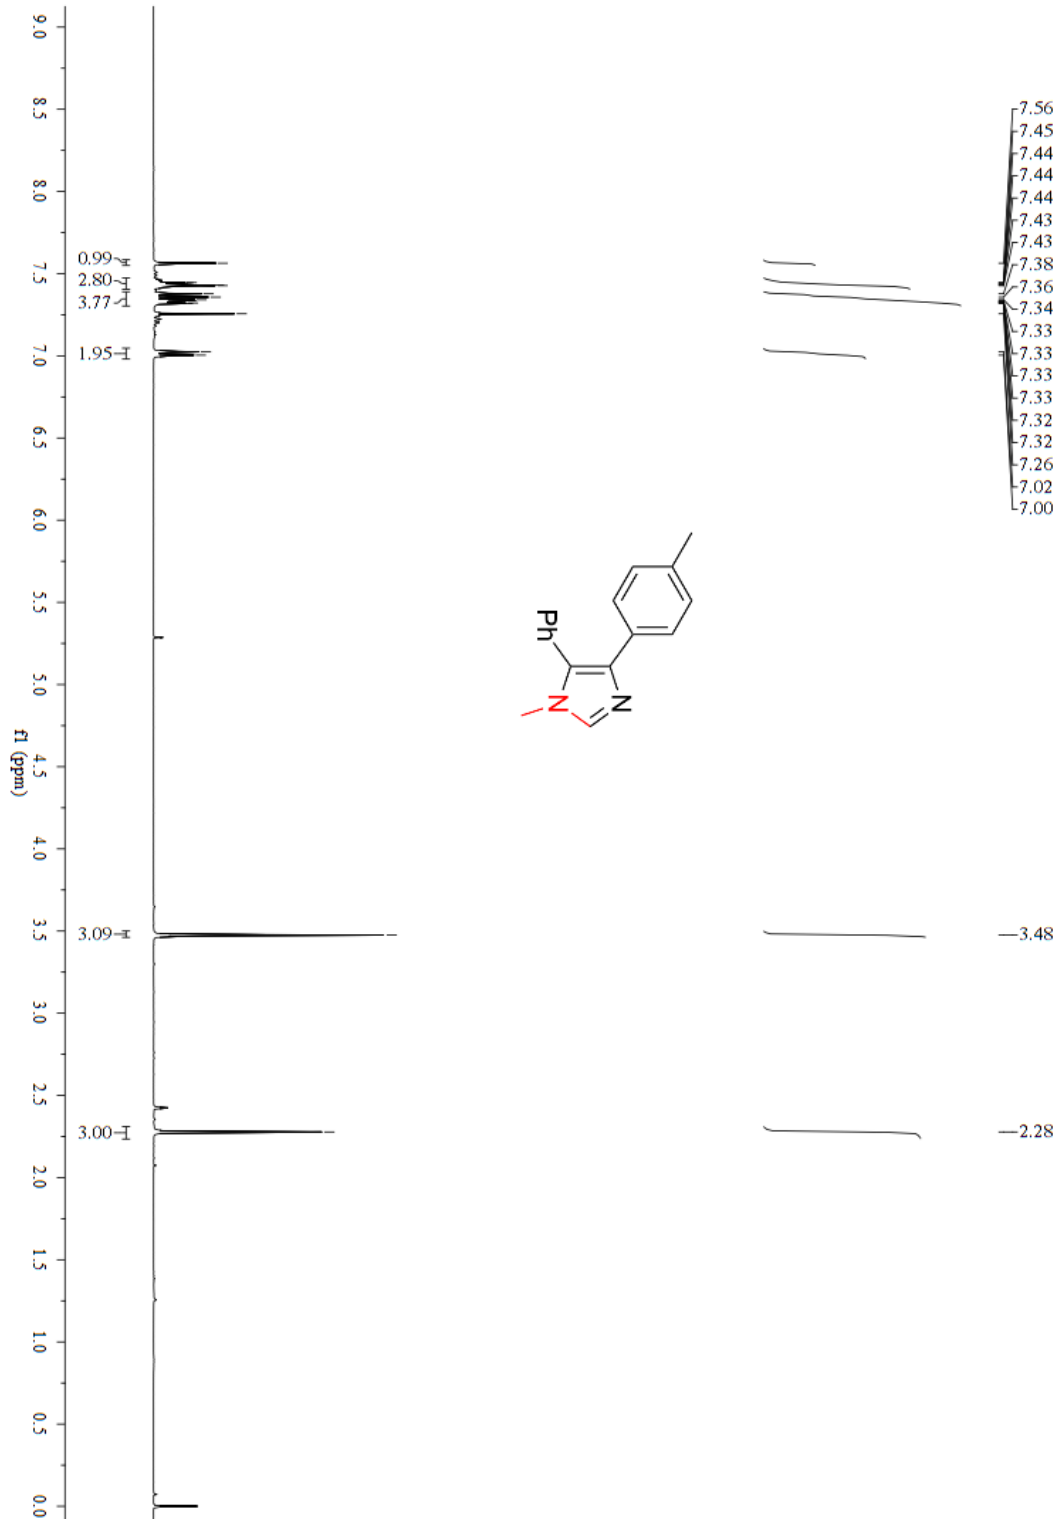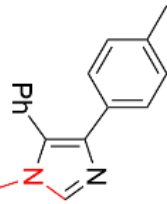

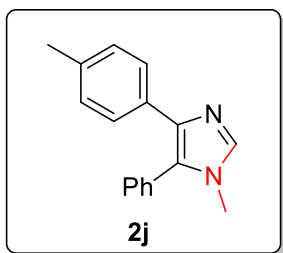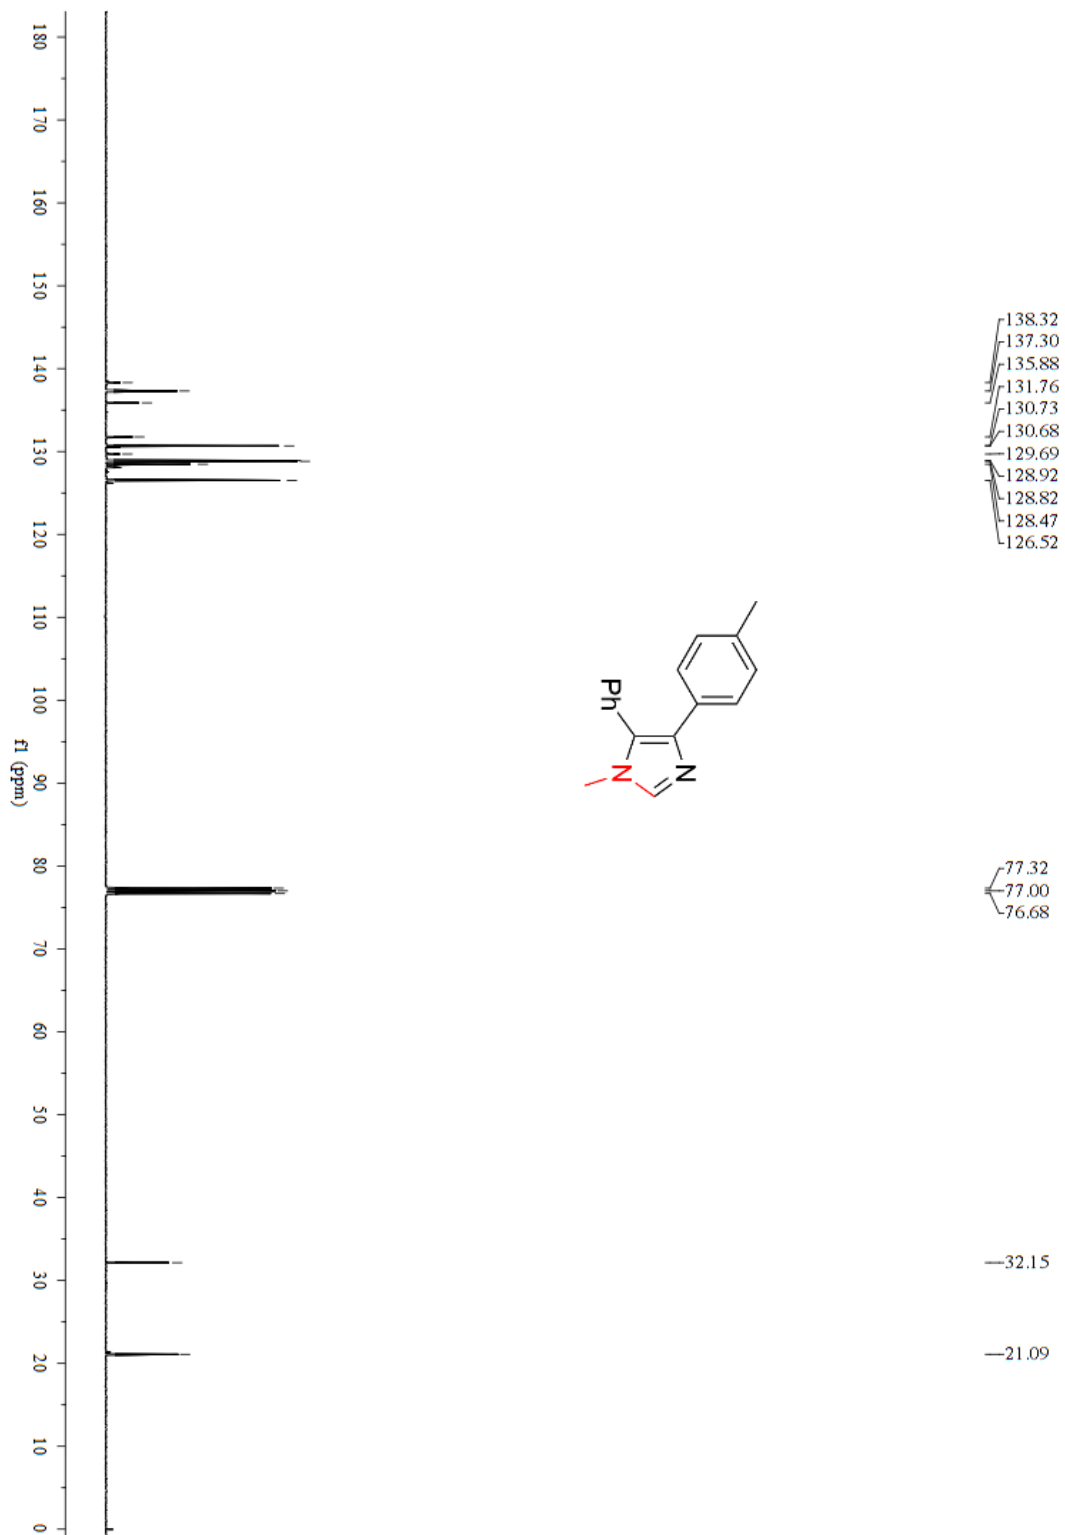

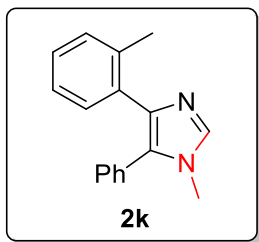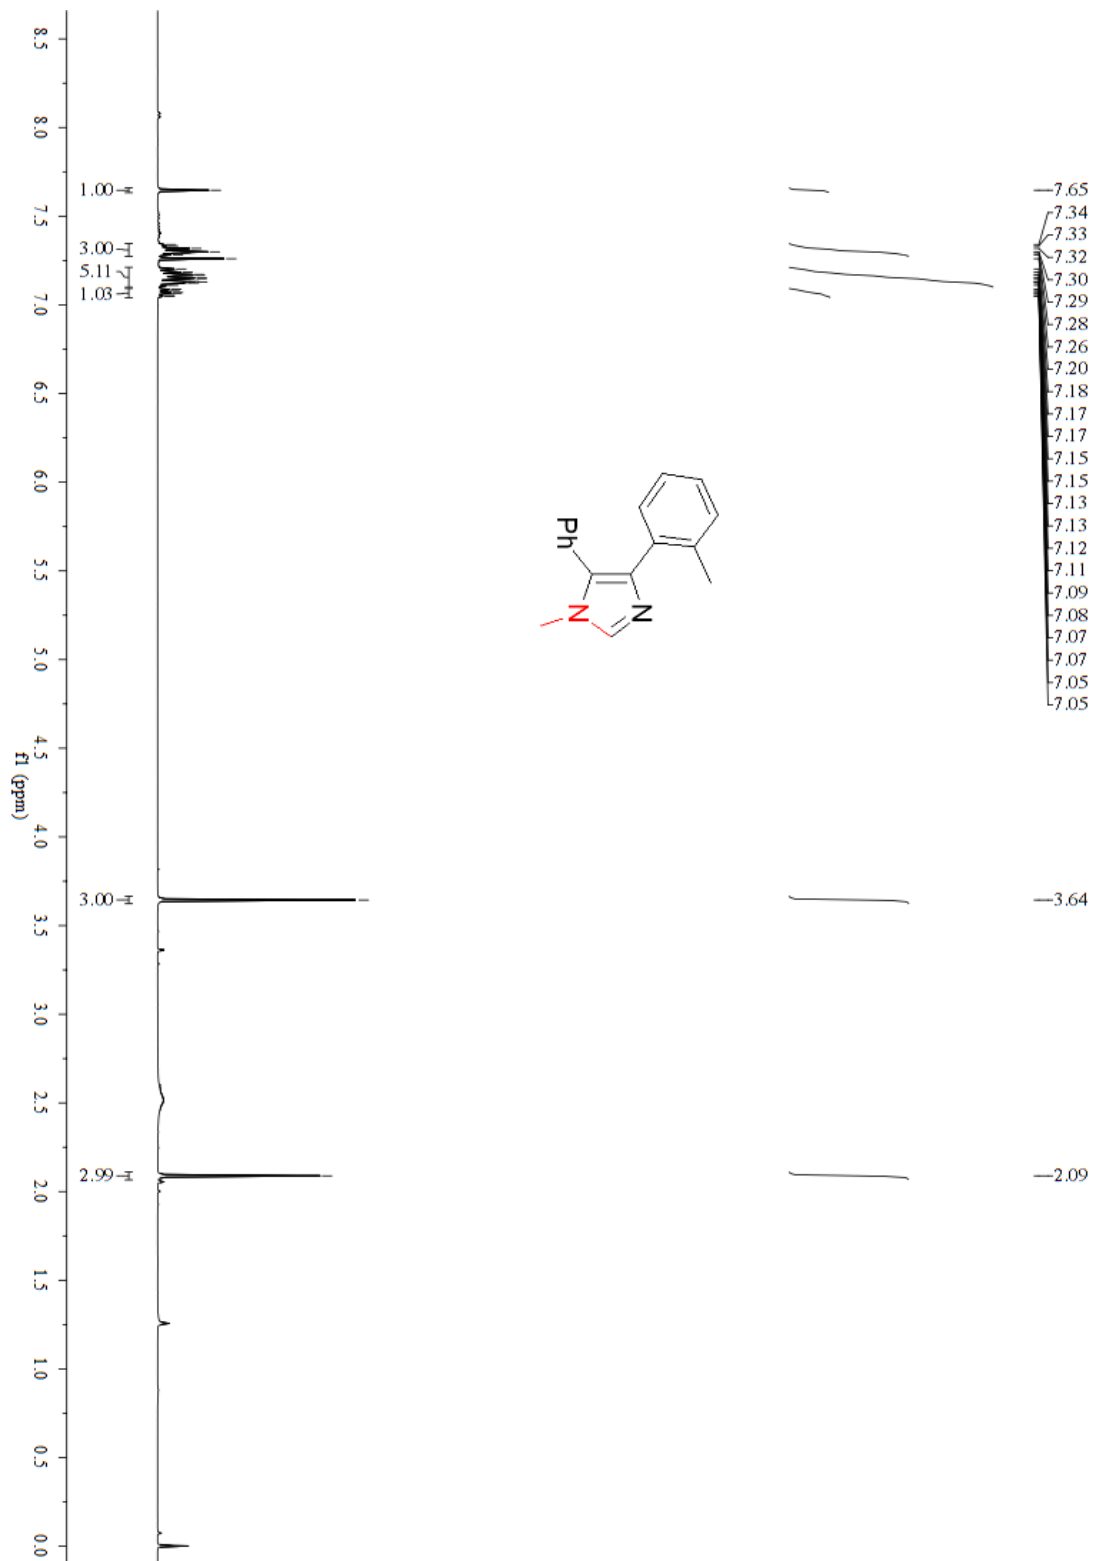

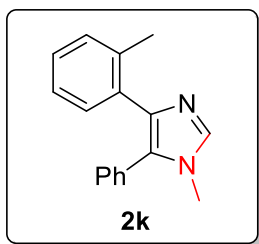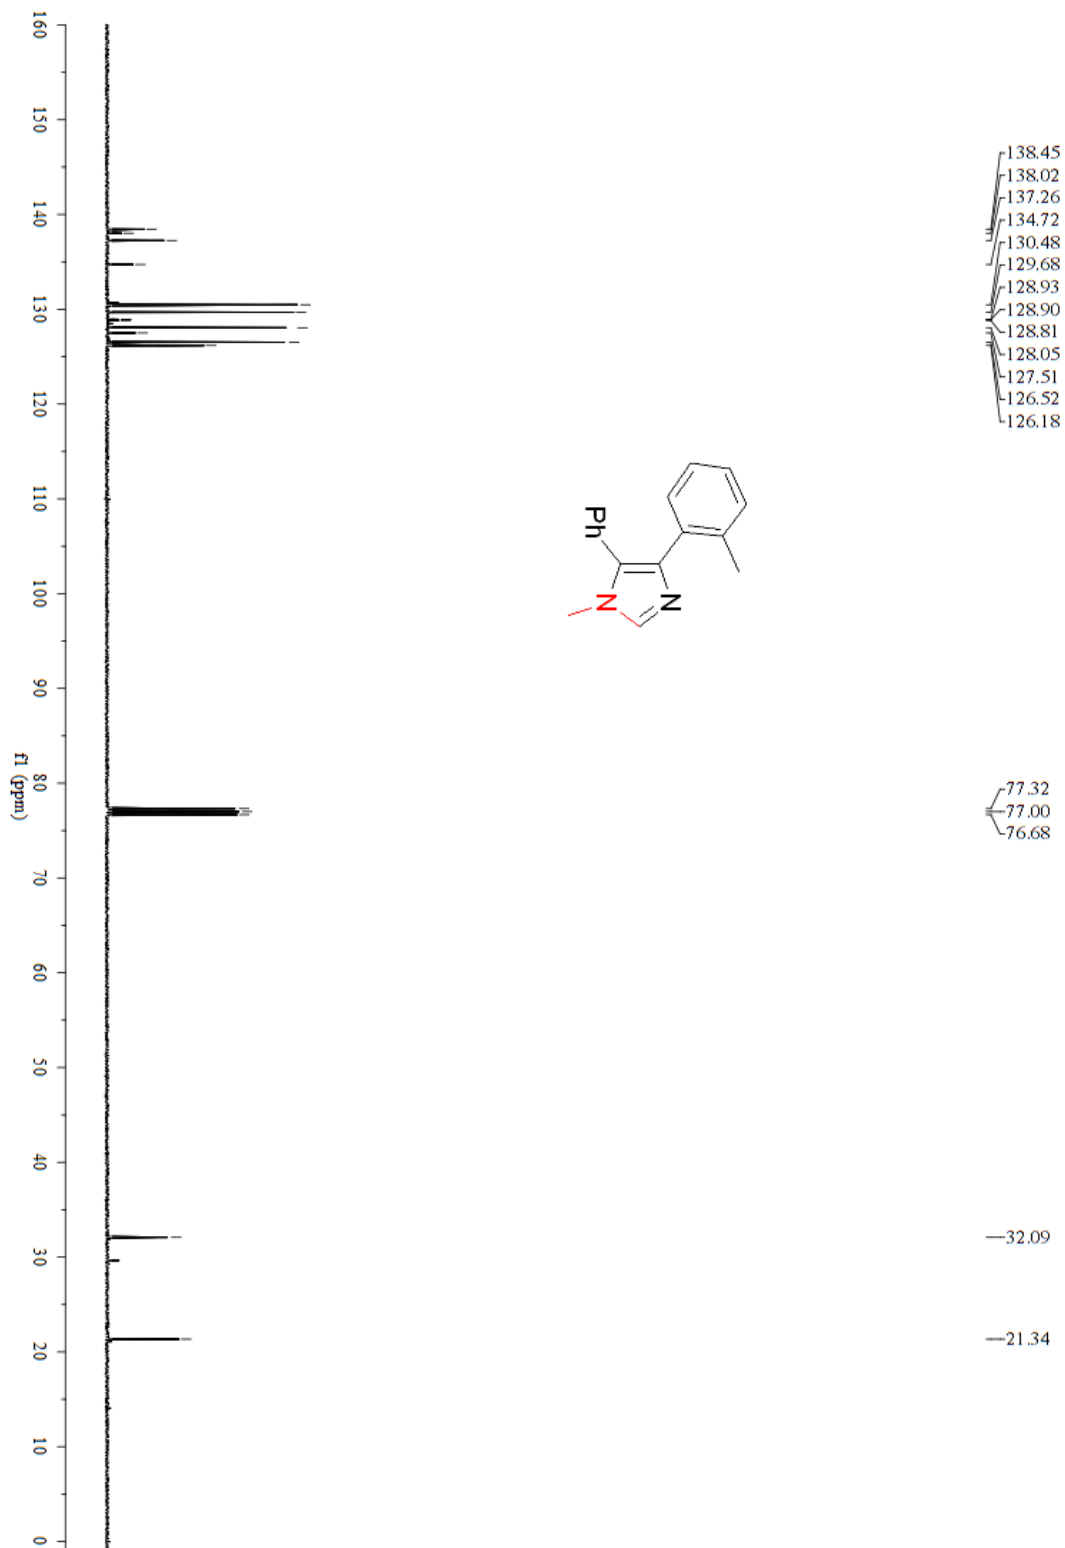

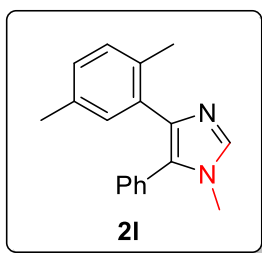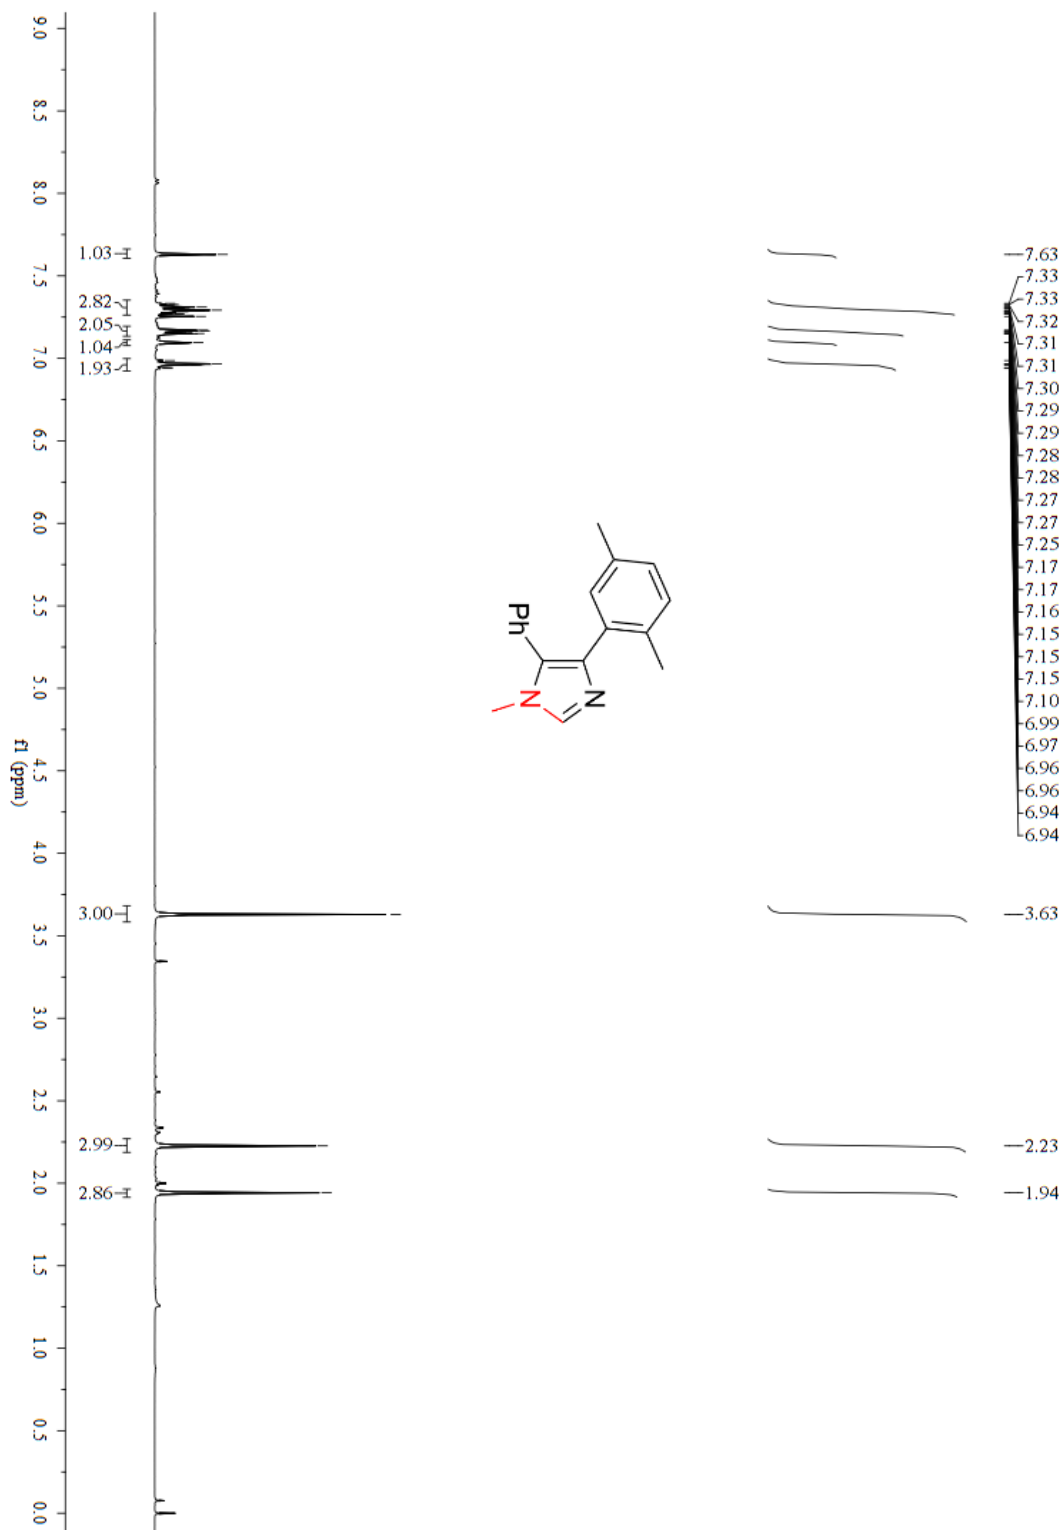

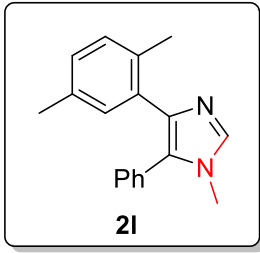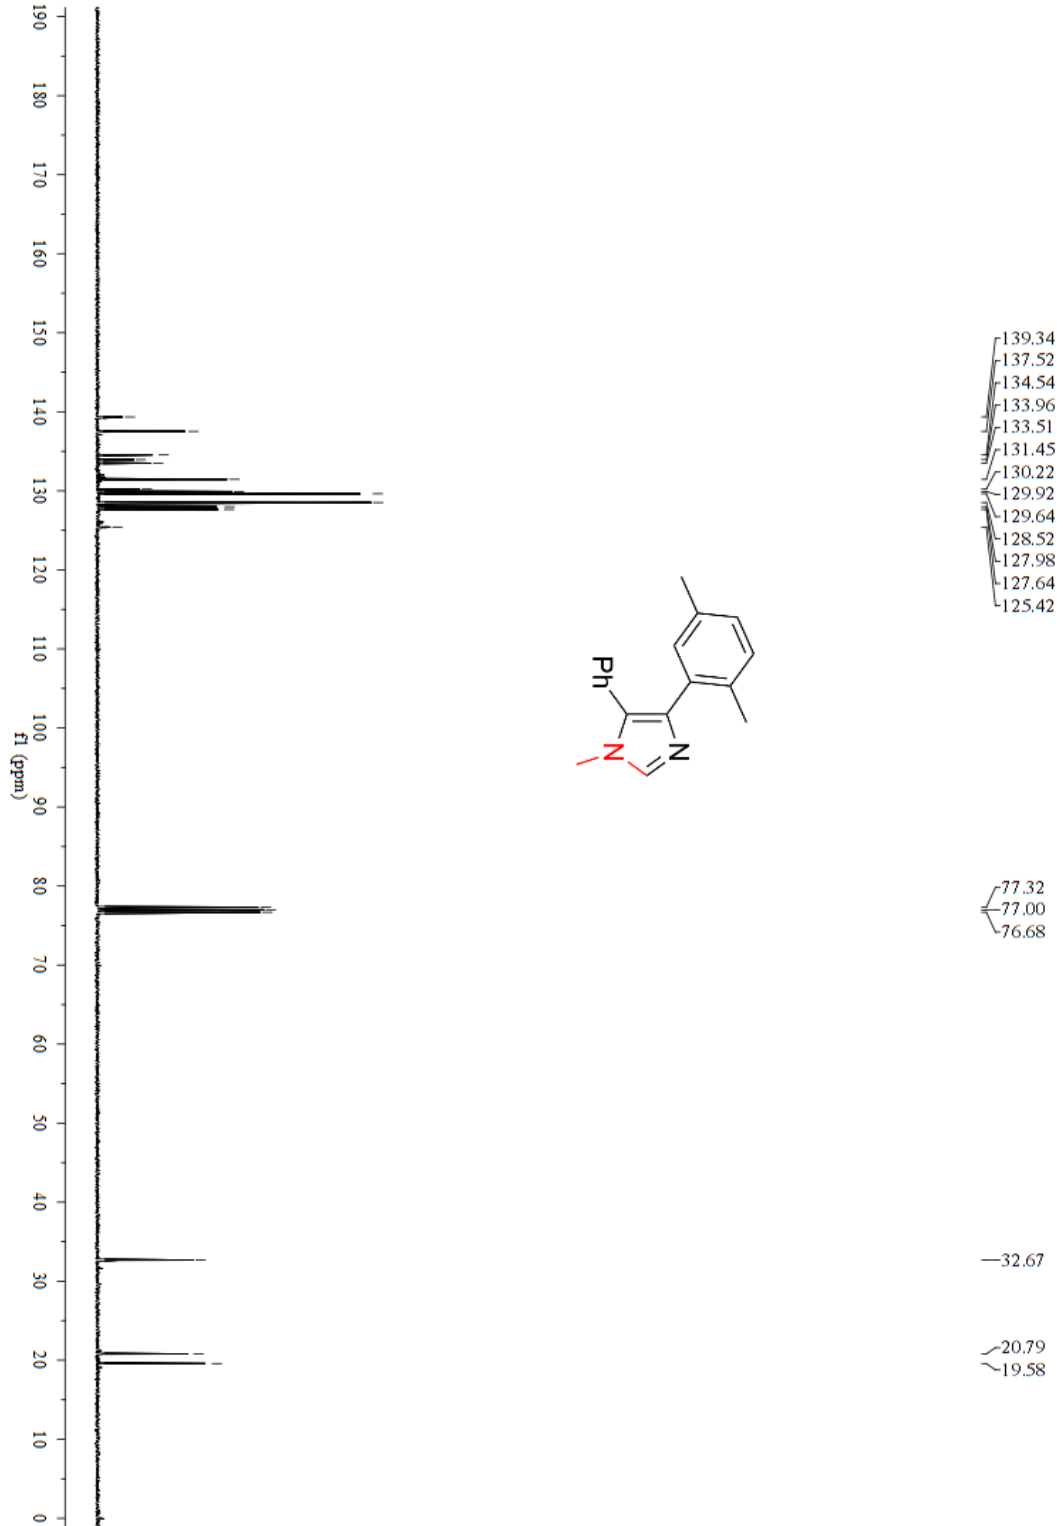



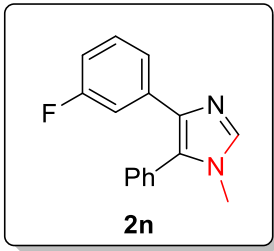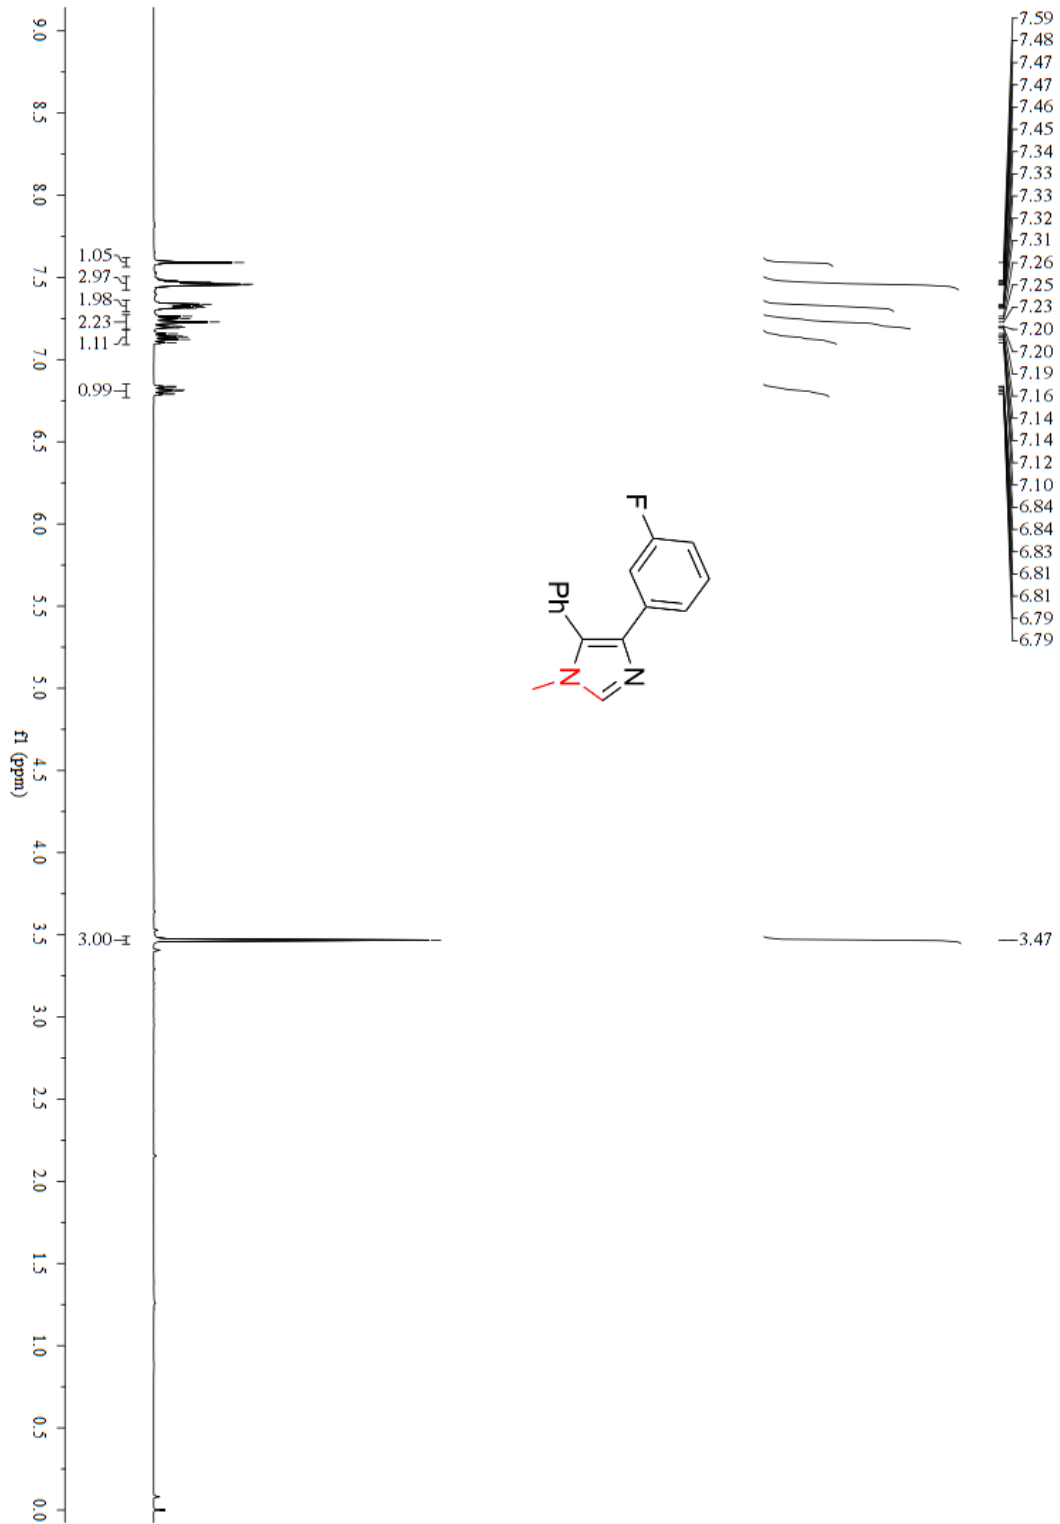

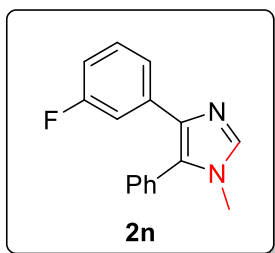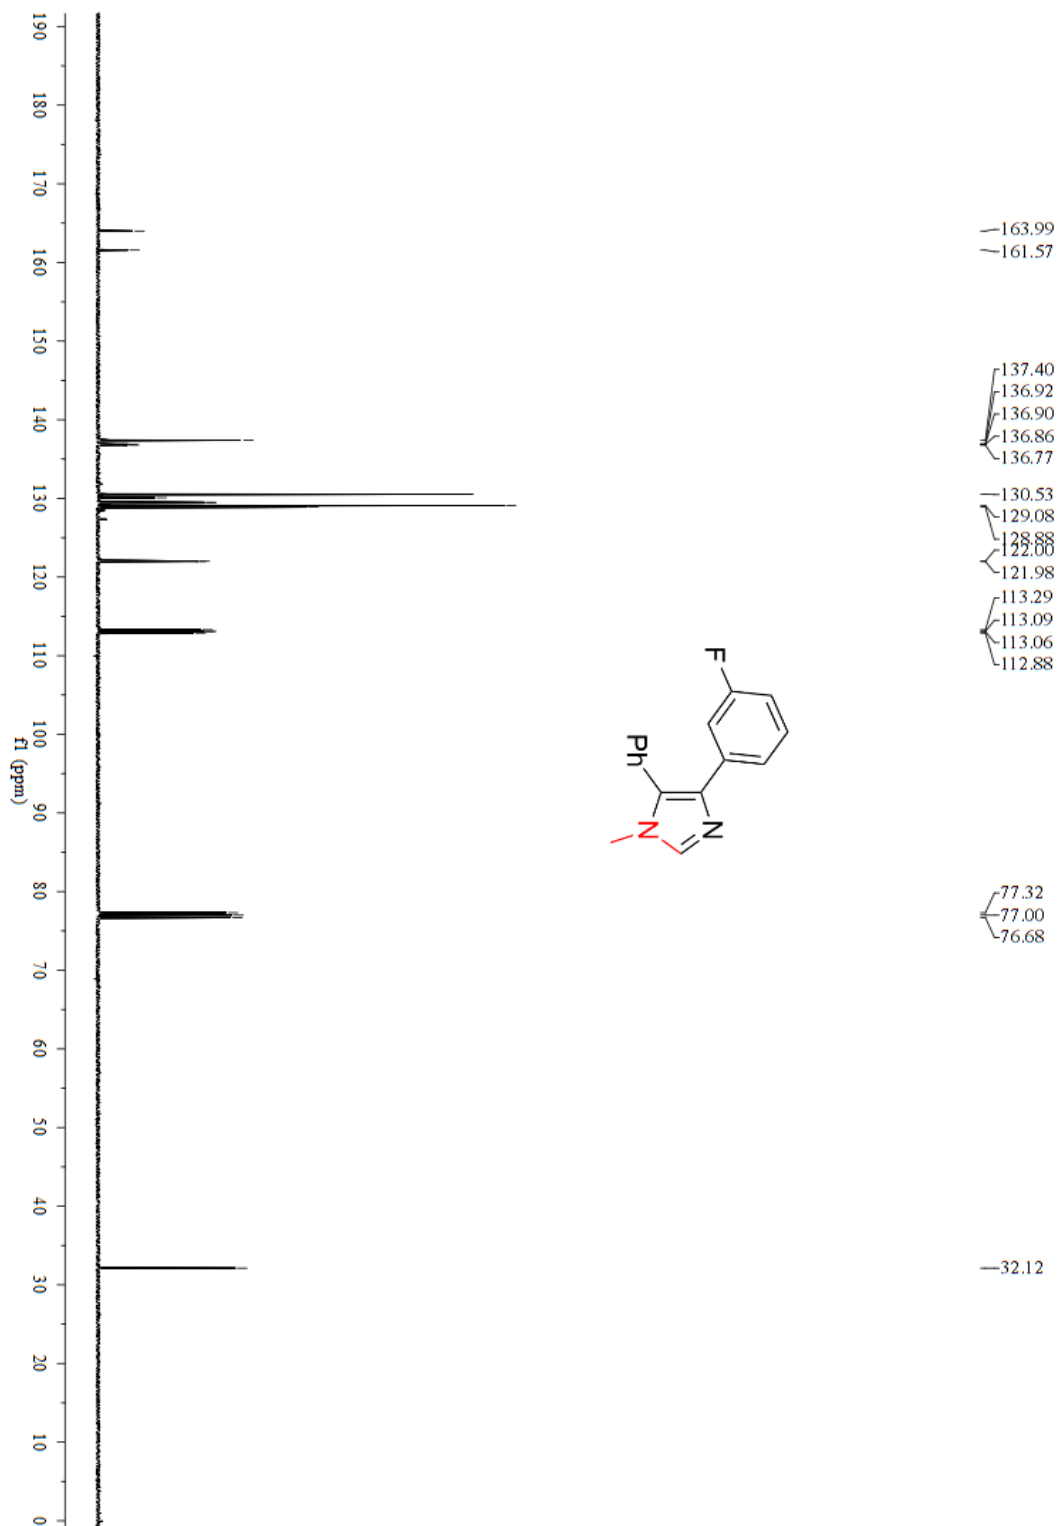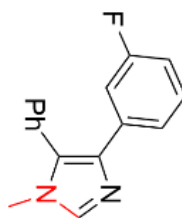

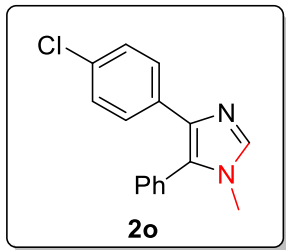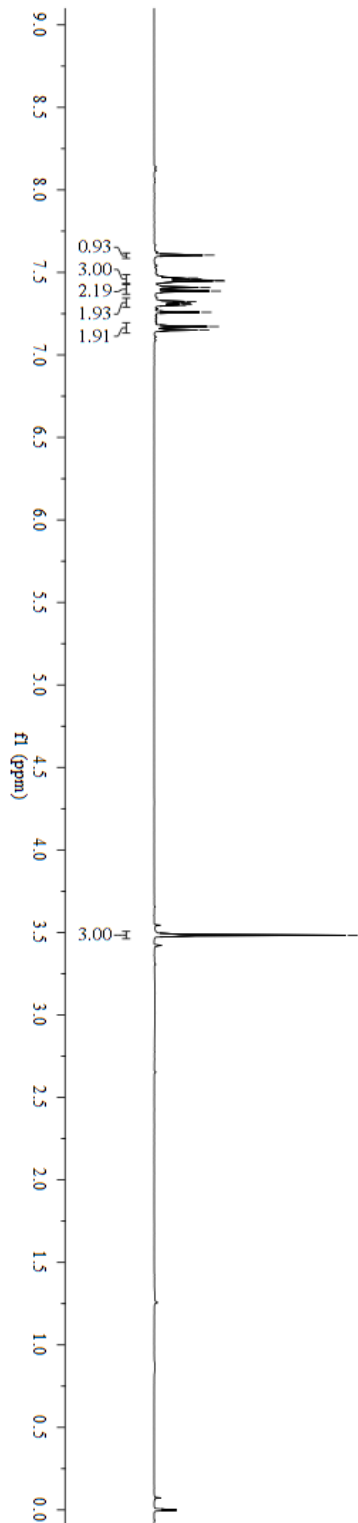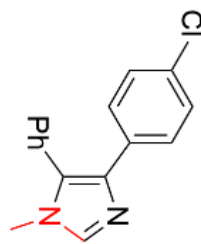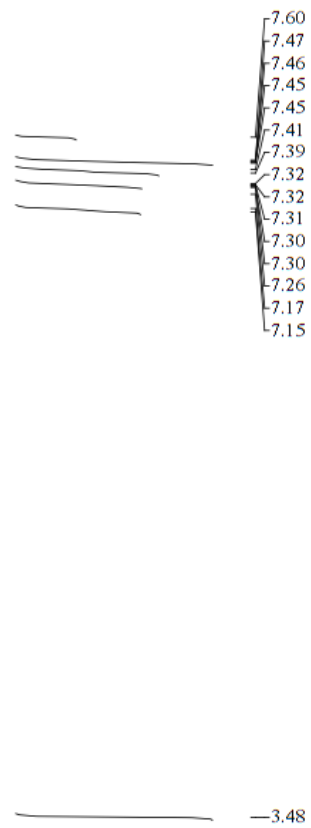



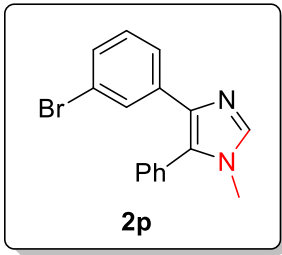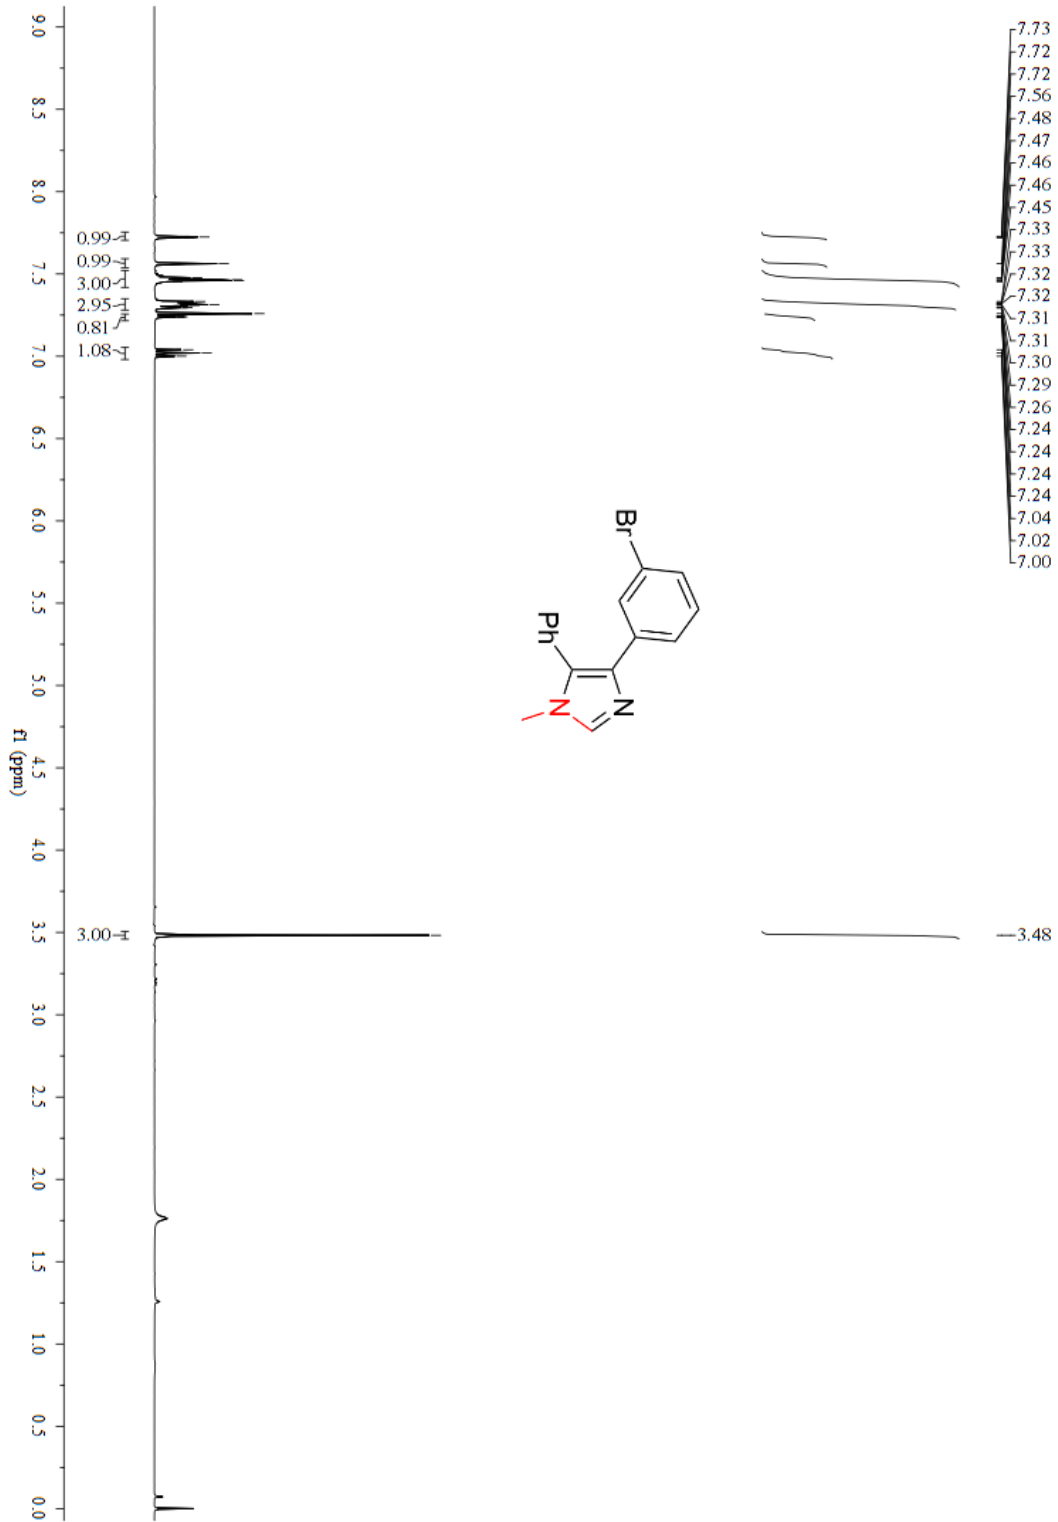

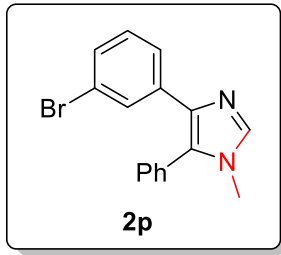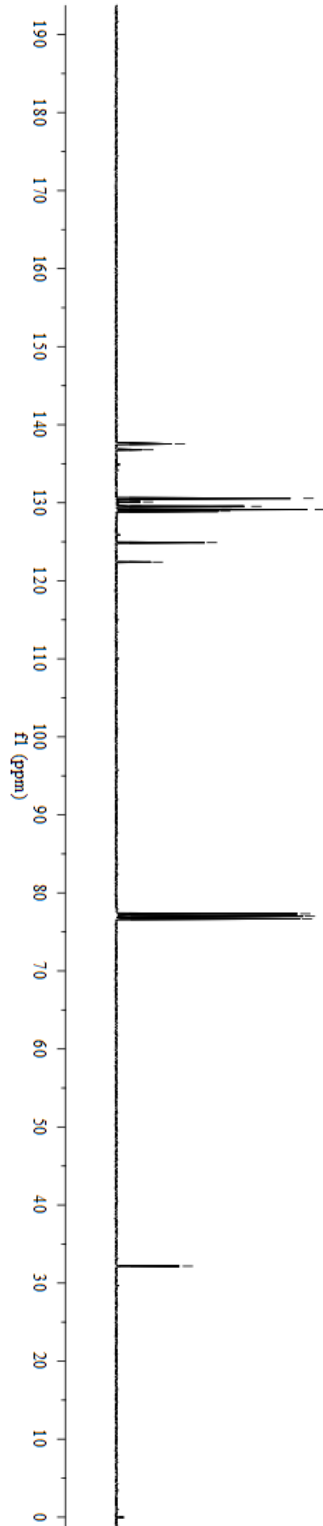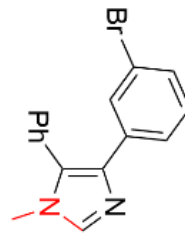

137.53  
136.82  
136.78  
130.56  
130.11  
129.58  
129.54  
129.17  
129.12  
128.91  
124.89  
122.40

77.32  
77.00  
76.68

32.16

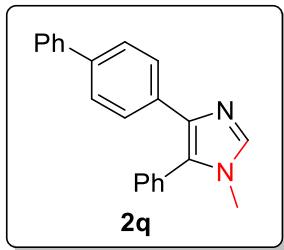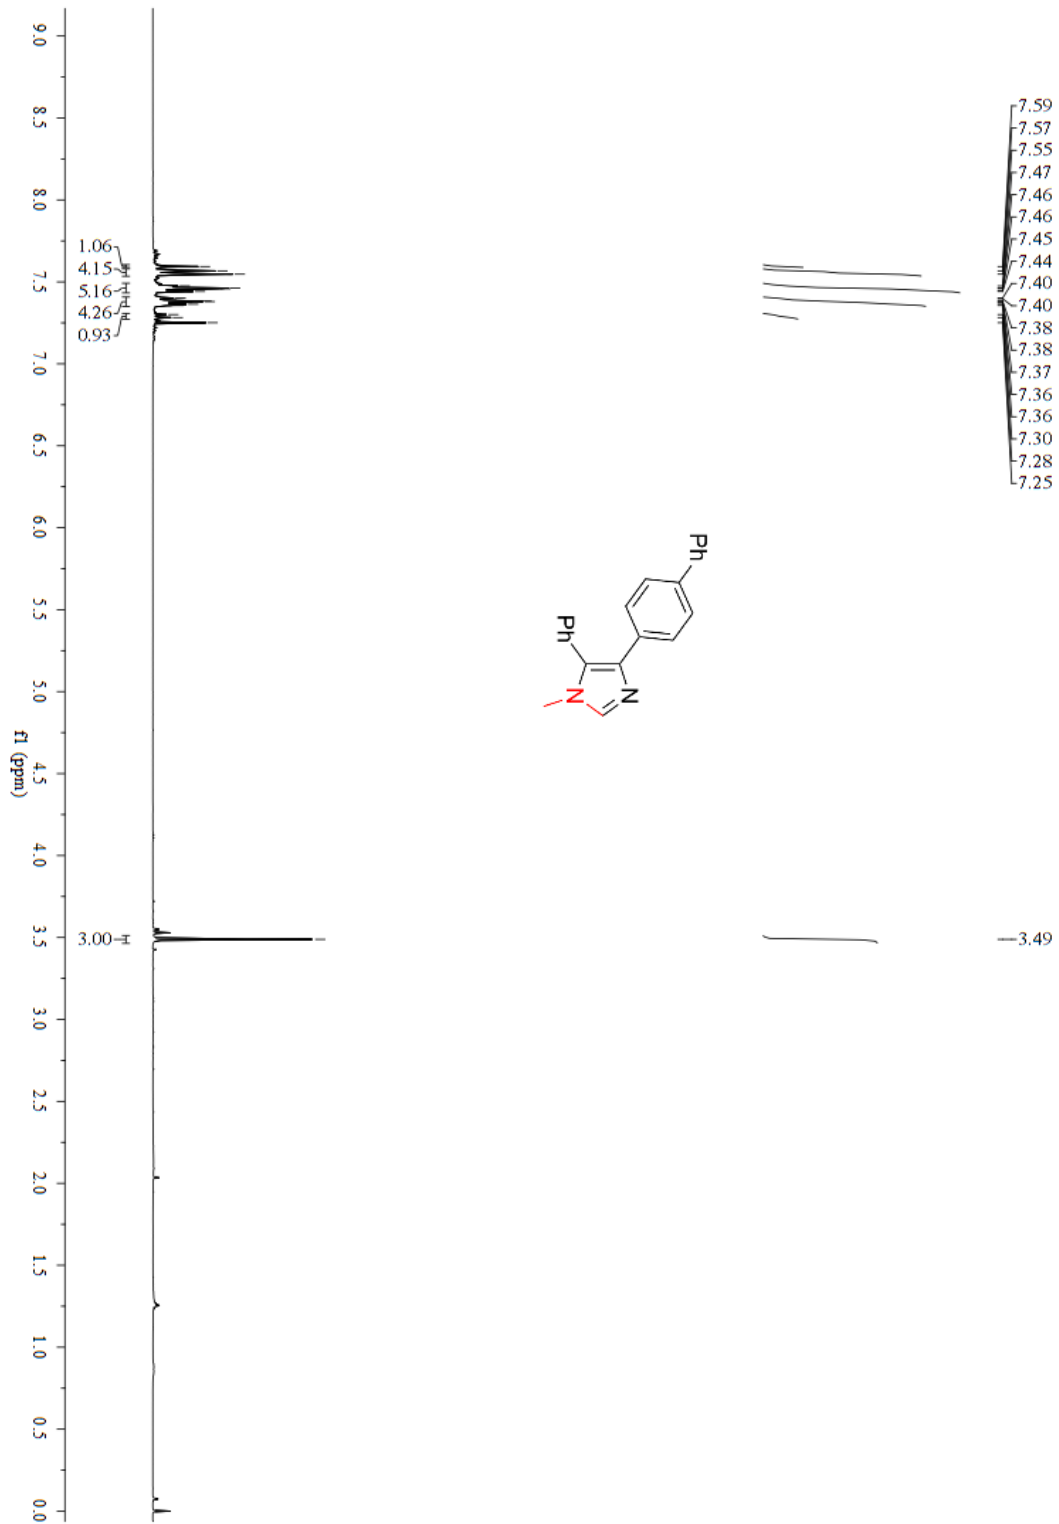

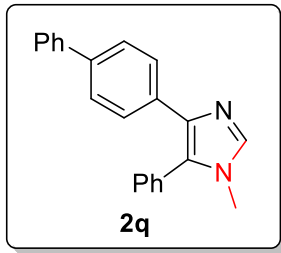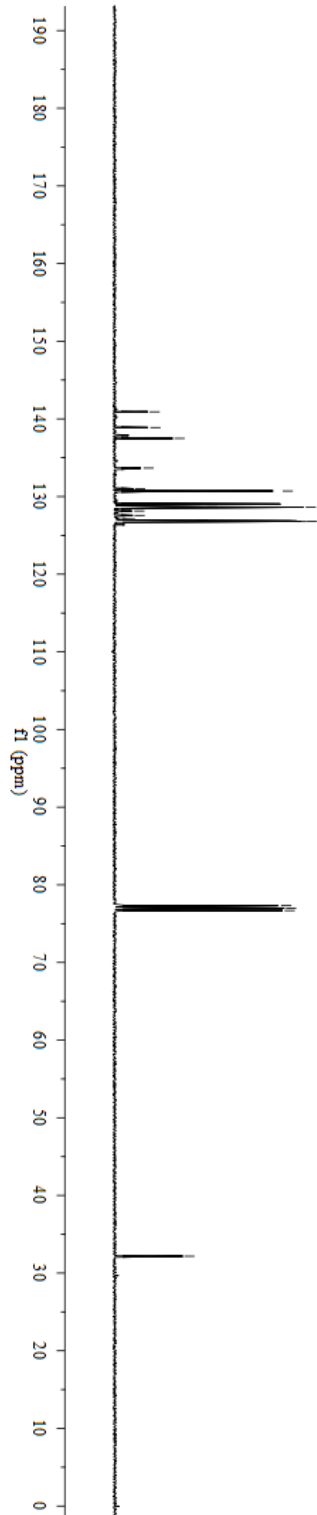

- 140.91
- 138.88
- 137.48
- 133.66
- 131.01
- 130.71
- 130.61
- 128.67
- 128.62
- 128.15
- 127.57
- 126.96
- 126.87
- 126.81
- 126.78

- 77.32
- 77.00
- 76.68

-32.17

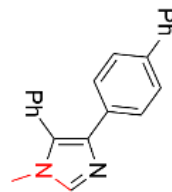



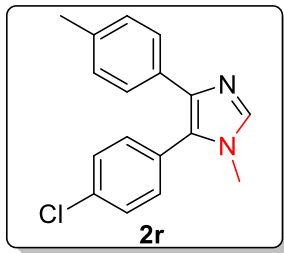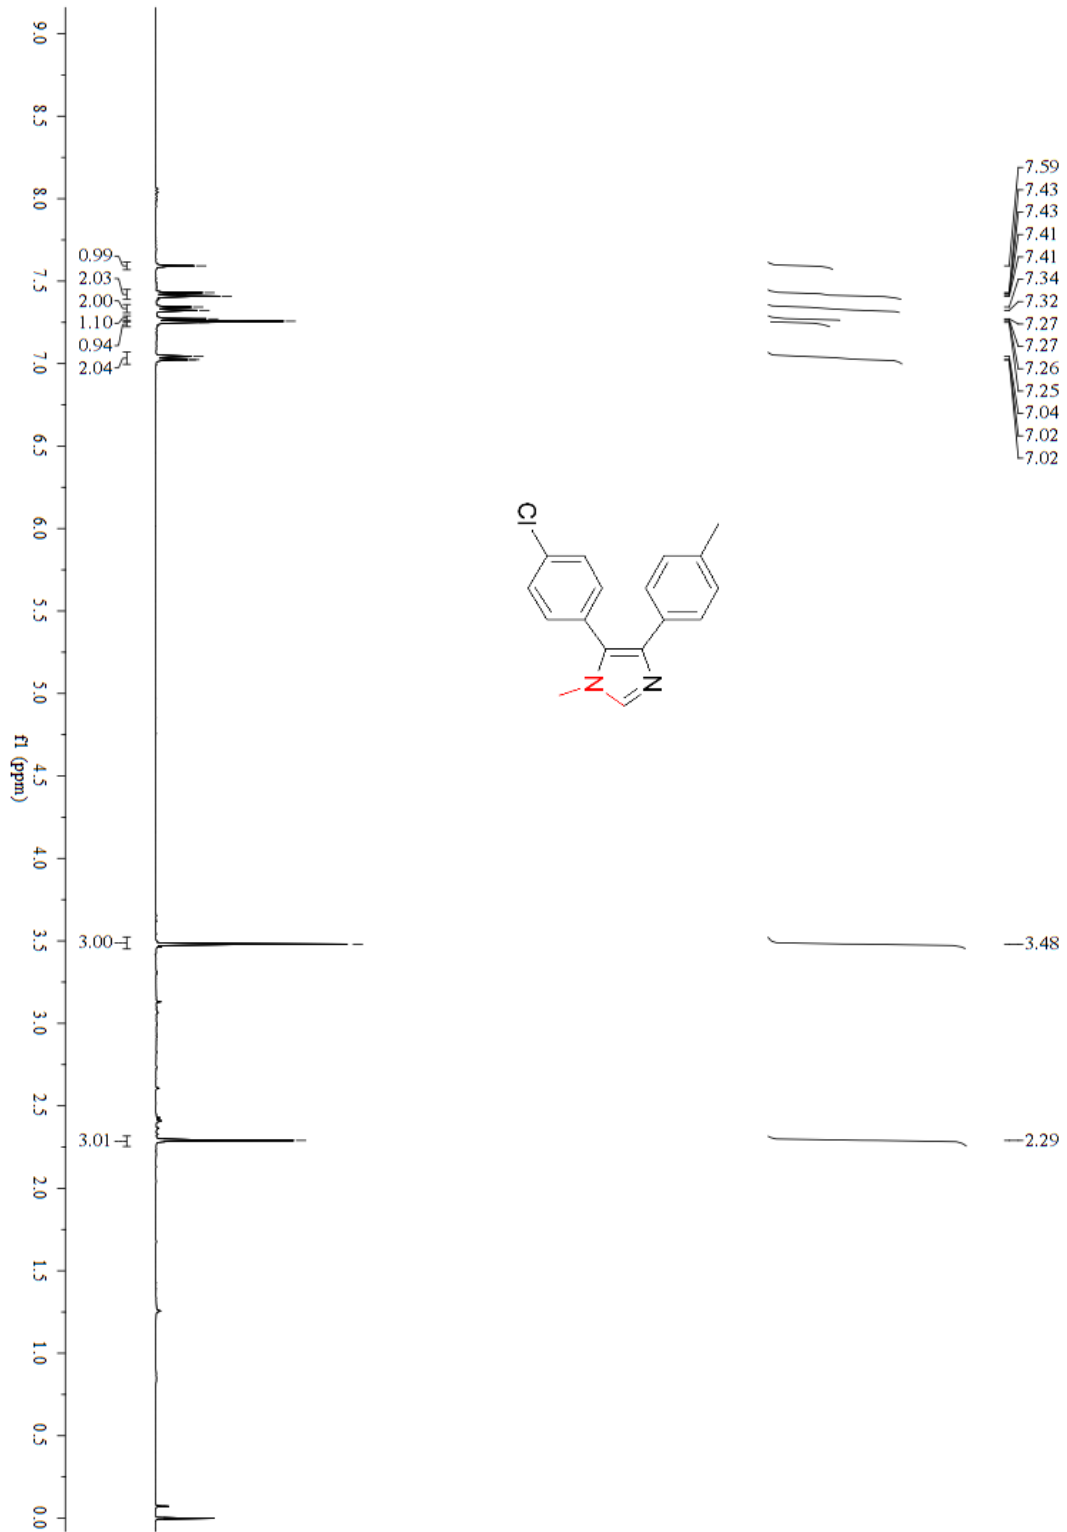

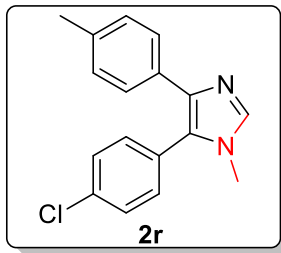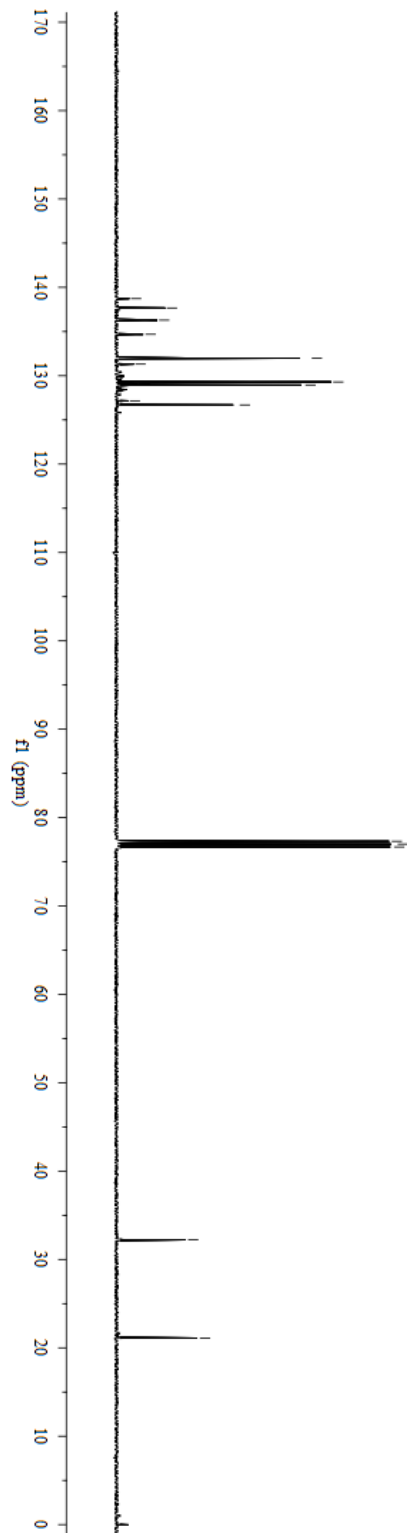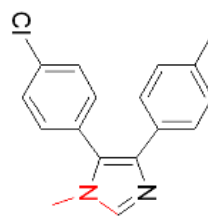

138.72  
137.67  
136.28  
134.69  
131.99  
131.31  
129.30  
129.08  
128.95  
127.17  
126.70

77.32  
77.00  
76.68

32.22

21.11

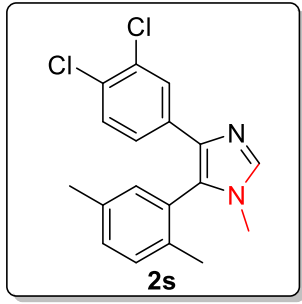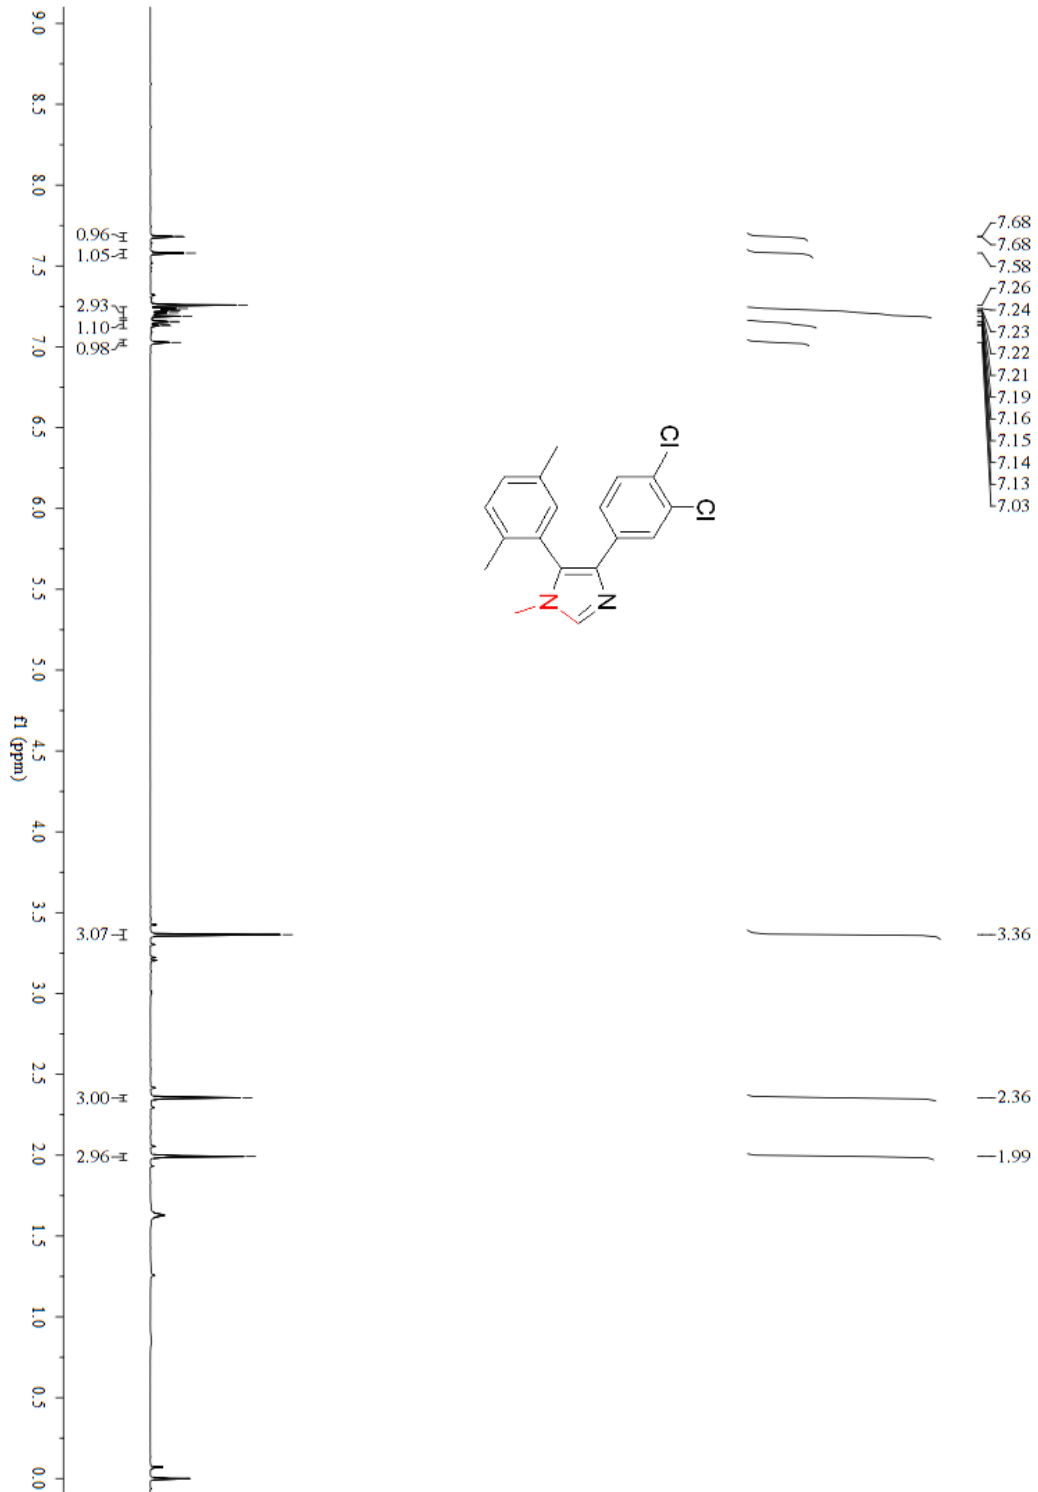

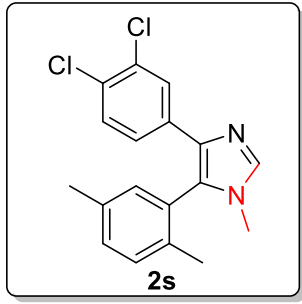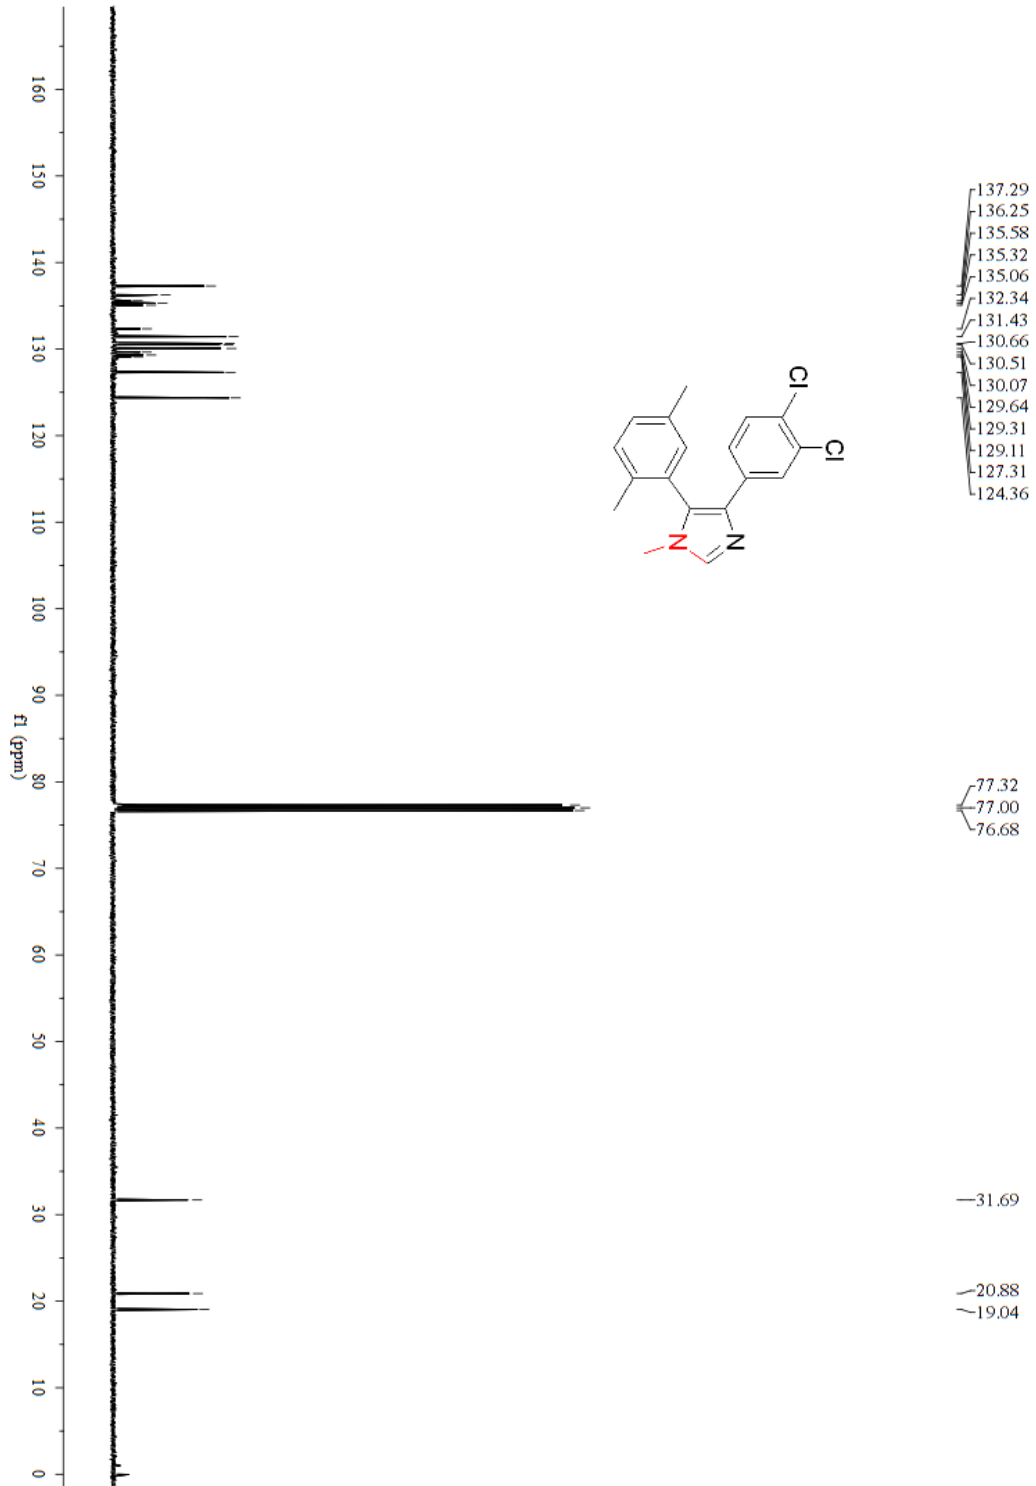

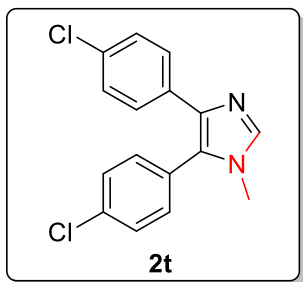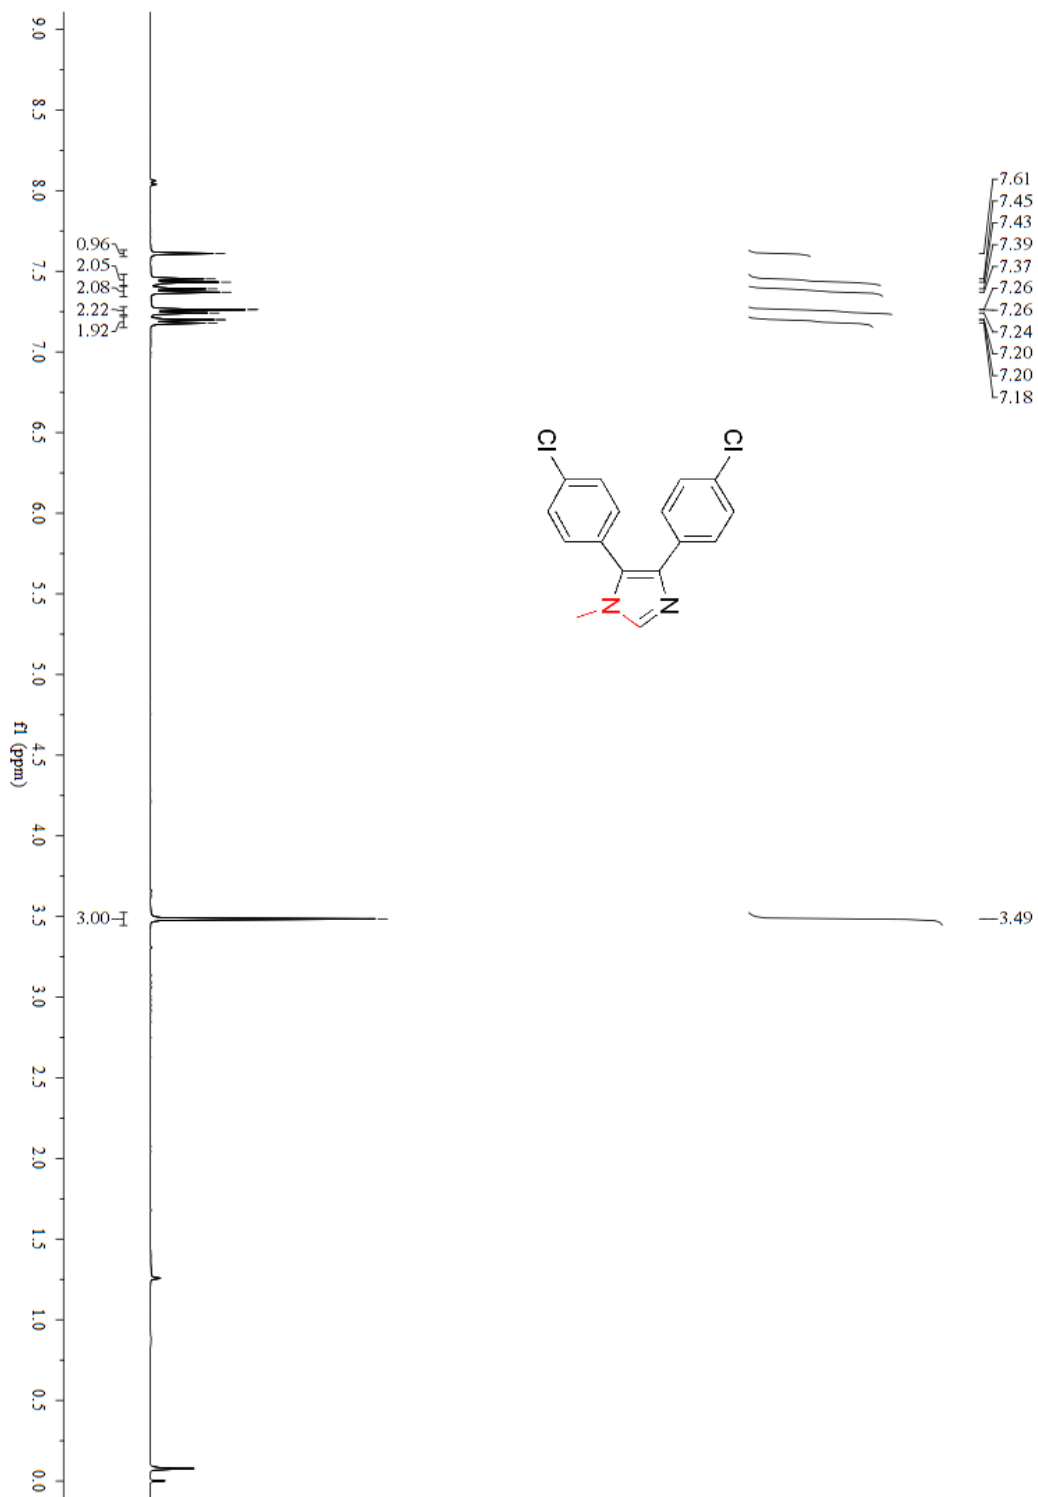

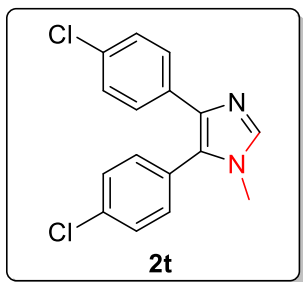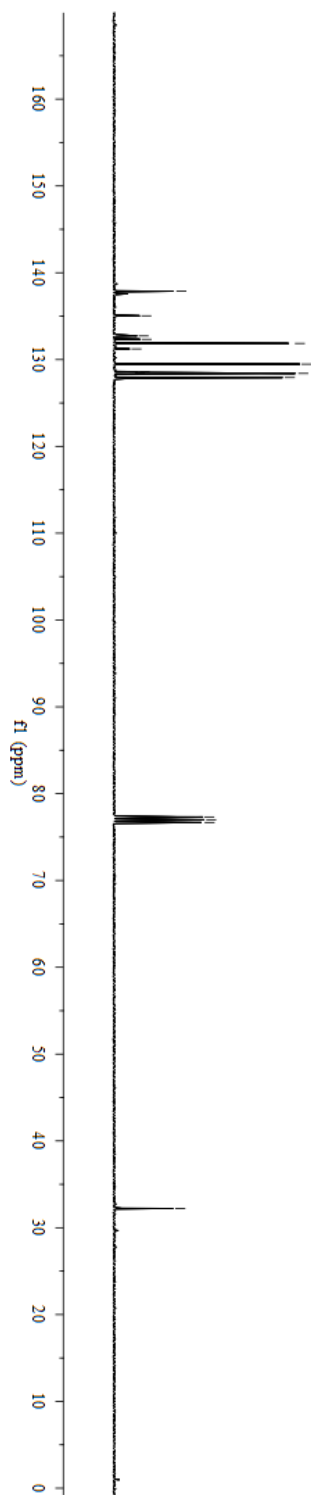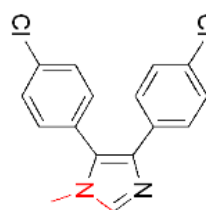

137.87  
135.04  
132.72  
132.33  
131.86  
131.23  
129.47  
128.62  
128.46  
128.40  
127.93

77.32  
77.00  
76.68

32.23

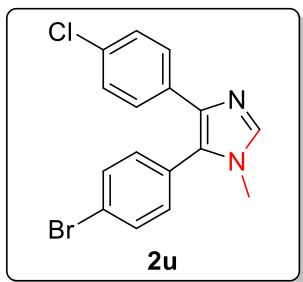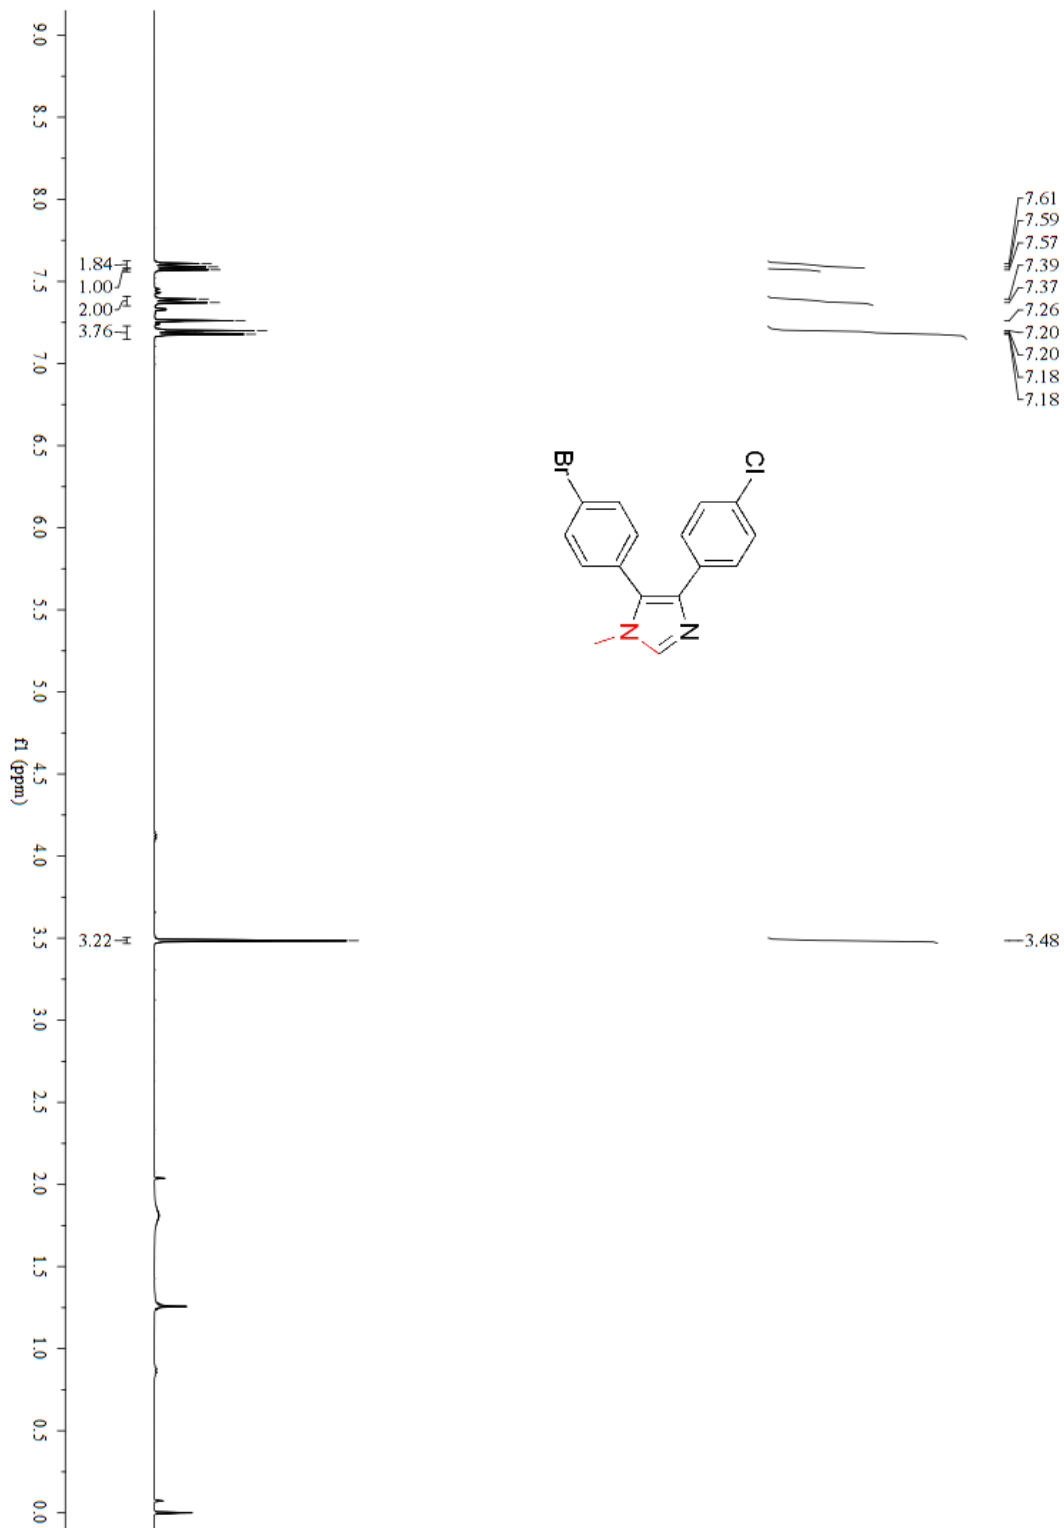

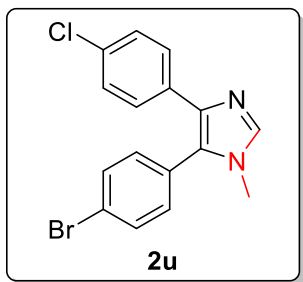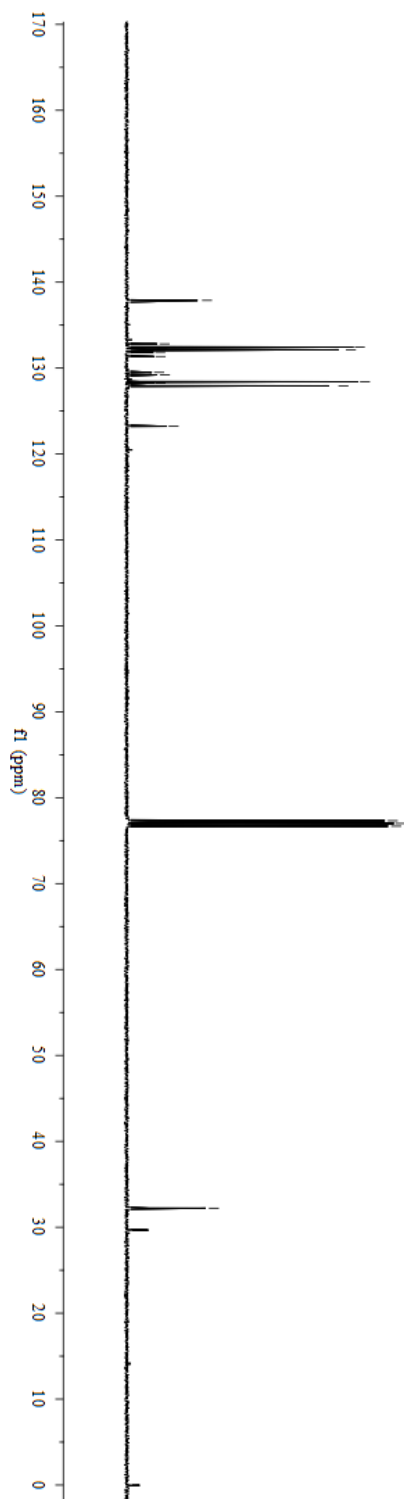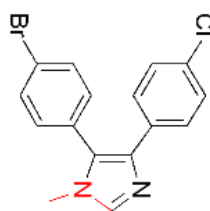

137.88  
132.82  
132.44  
132.35  
132.14  
131.86  
131.35  
129.49  
129.20  
128.42  
128.24  
127.94  
123.22

77.32  
77.00  
76.68

32.22



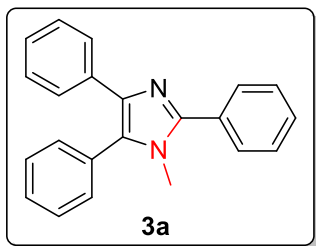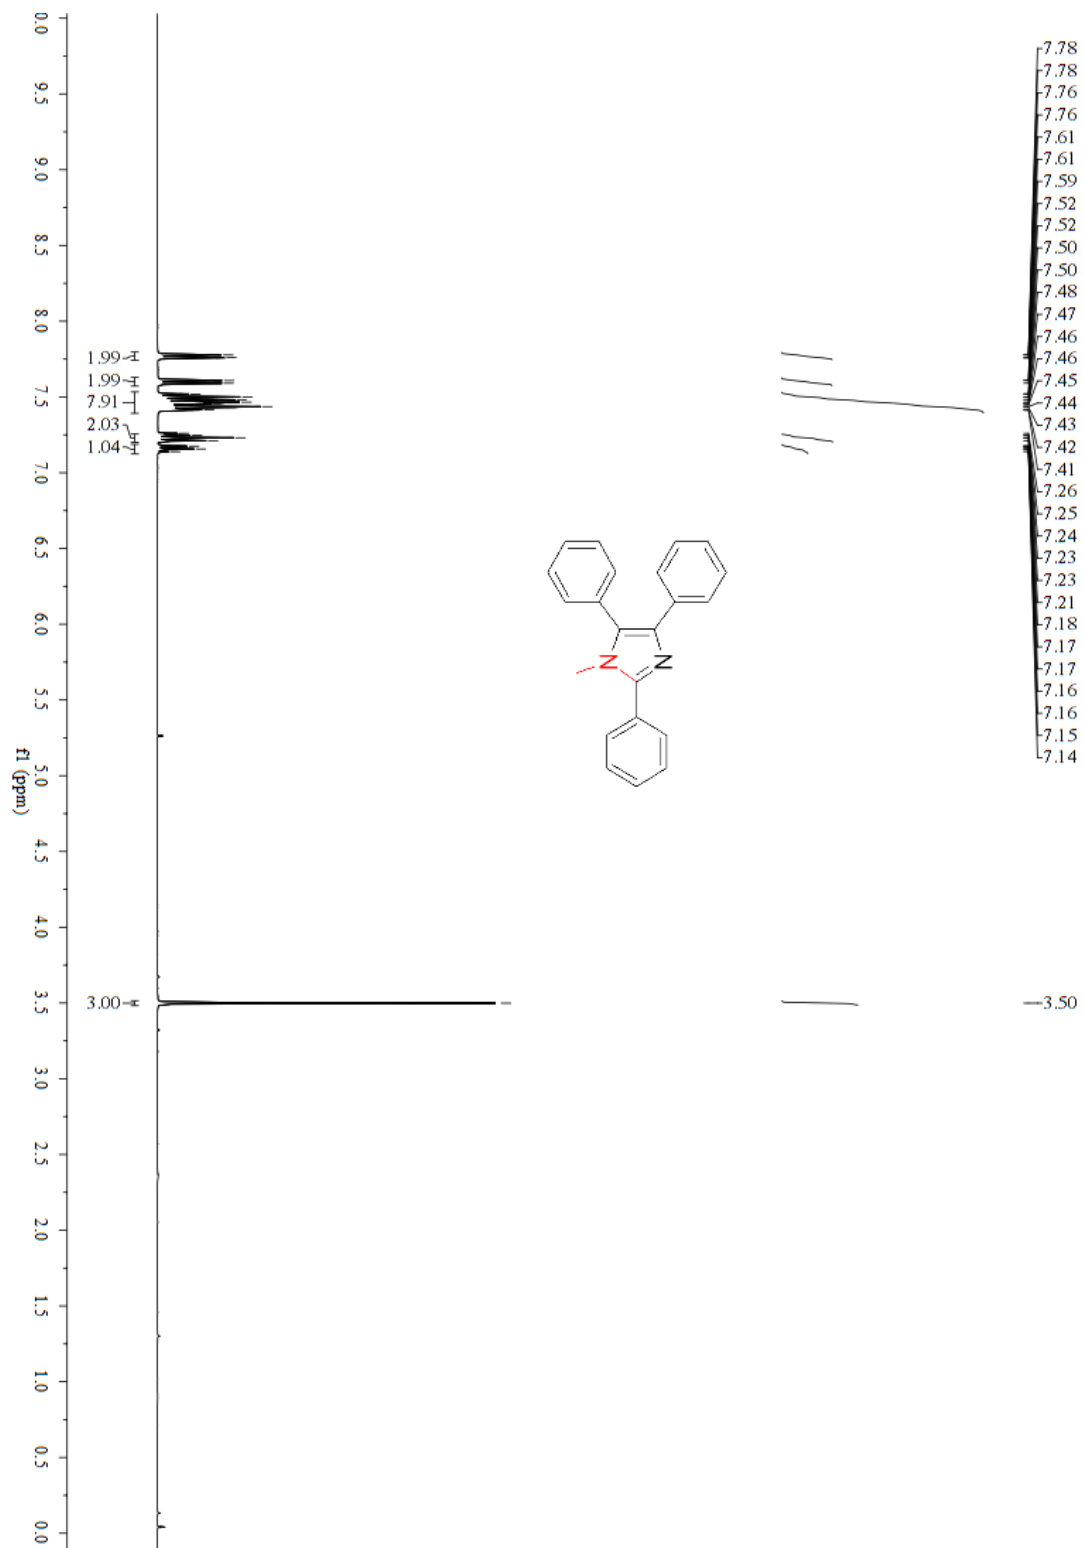

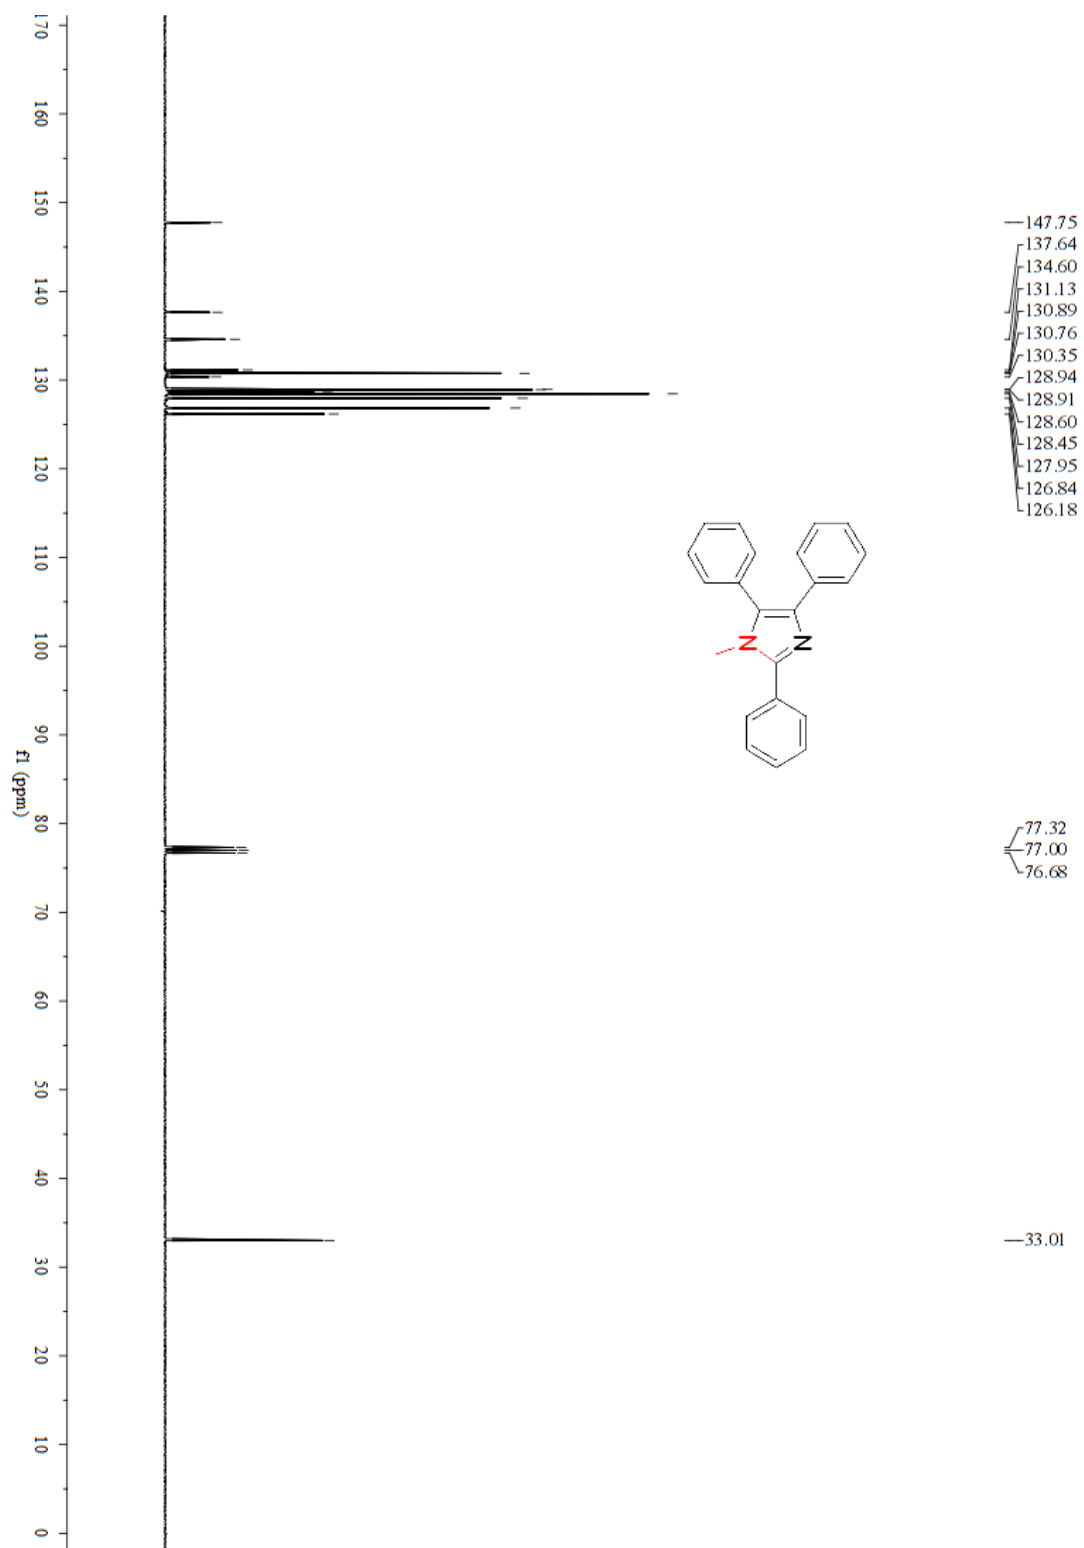

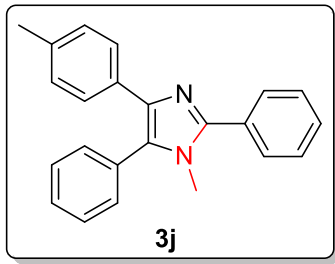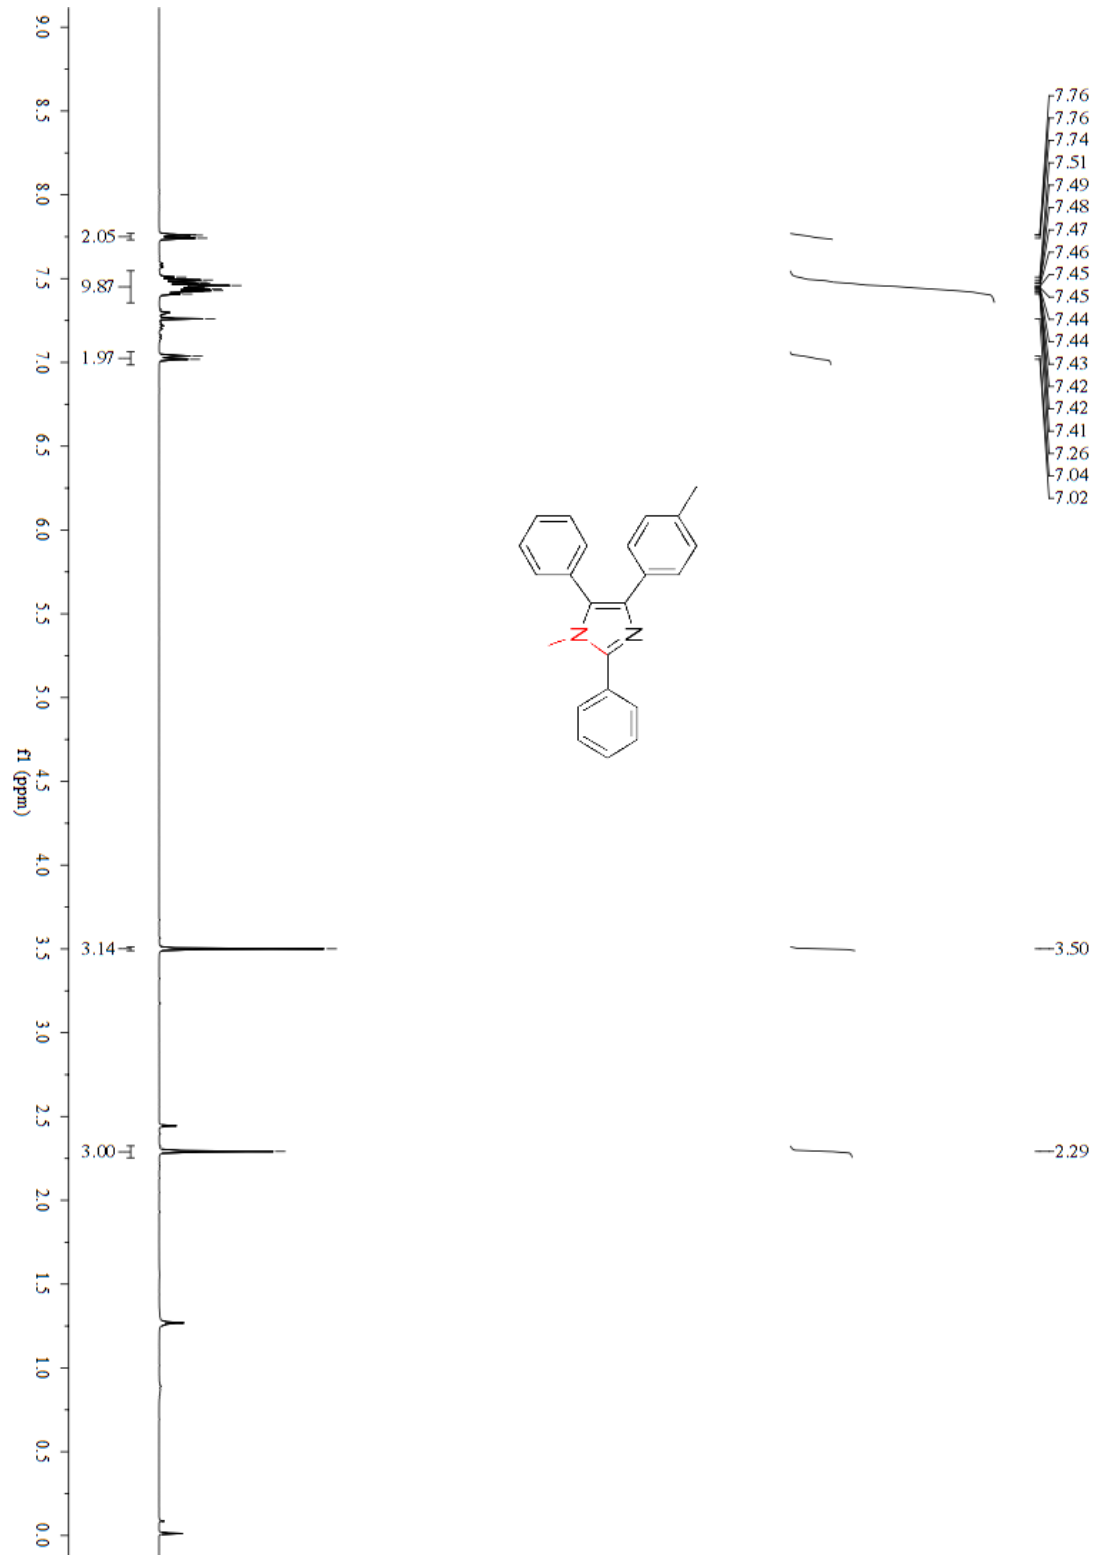

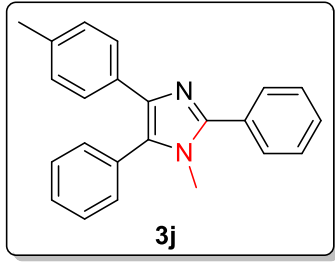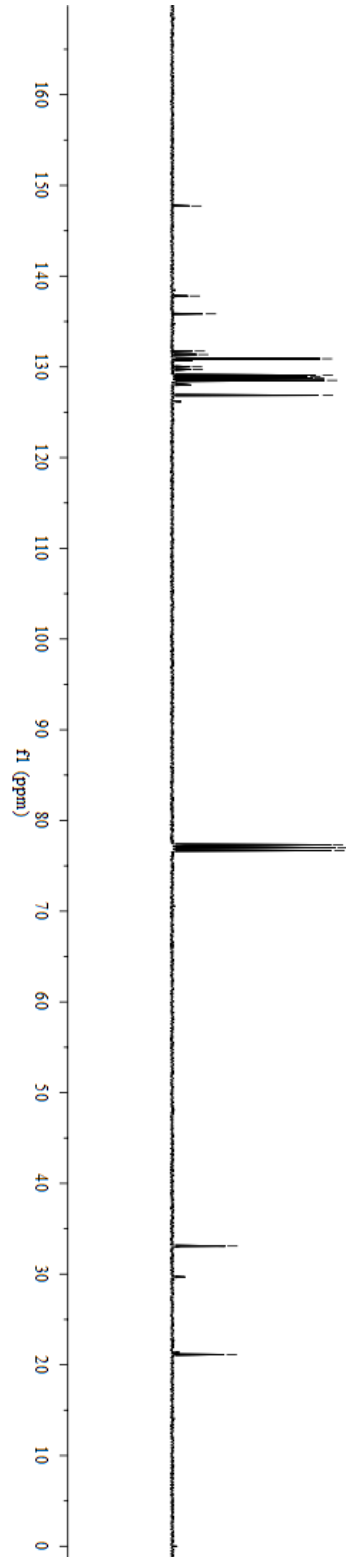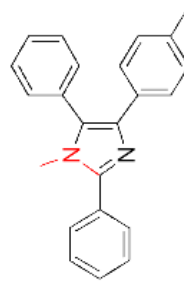

147.73  
137.81  
135.84  
131.74  
131.36  
130.89  
130.00  
129.73  
129.07  
128.95  
128.76  
128.66  
128.51  
128.44  
126.86

77.32  
77.00  
76.68

33.09

21.13

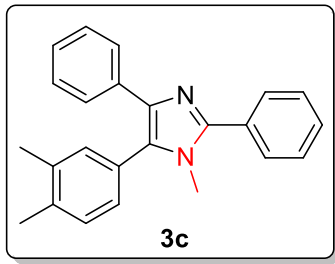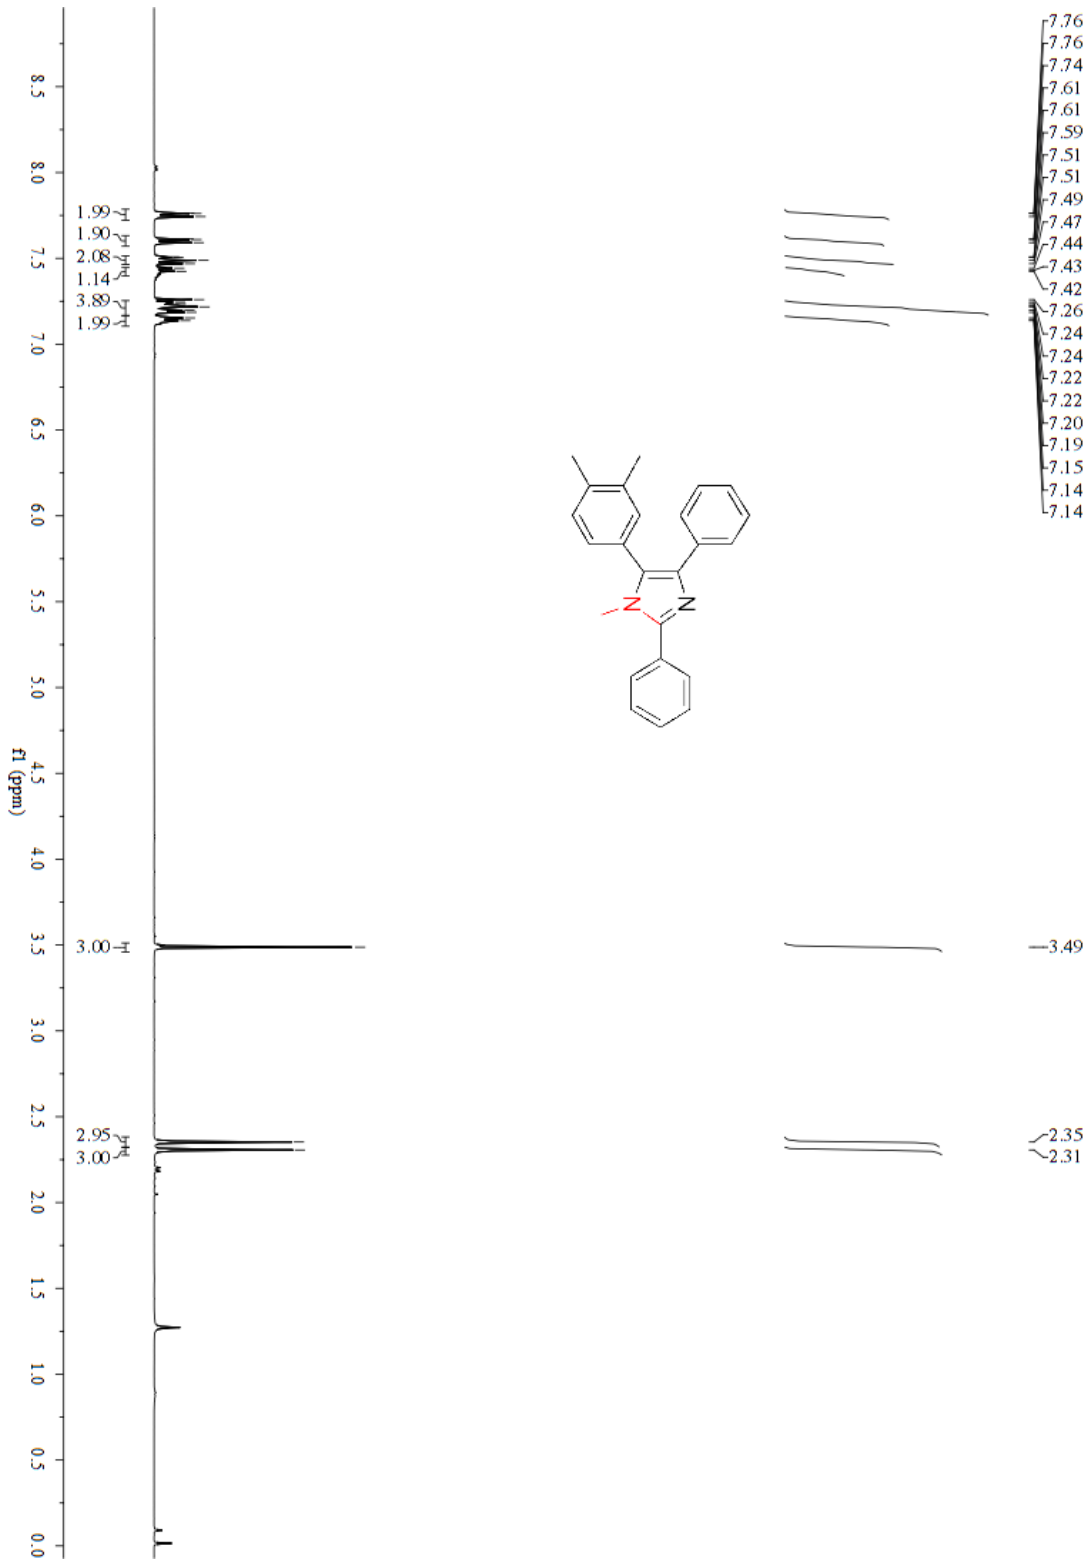

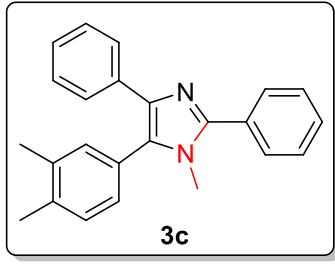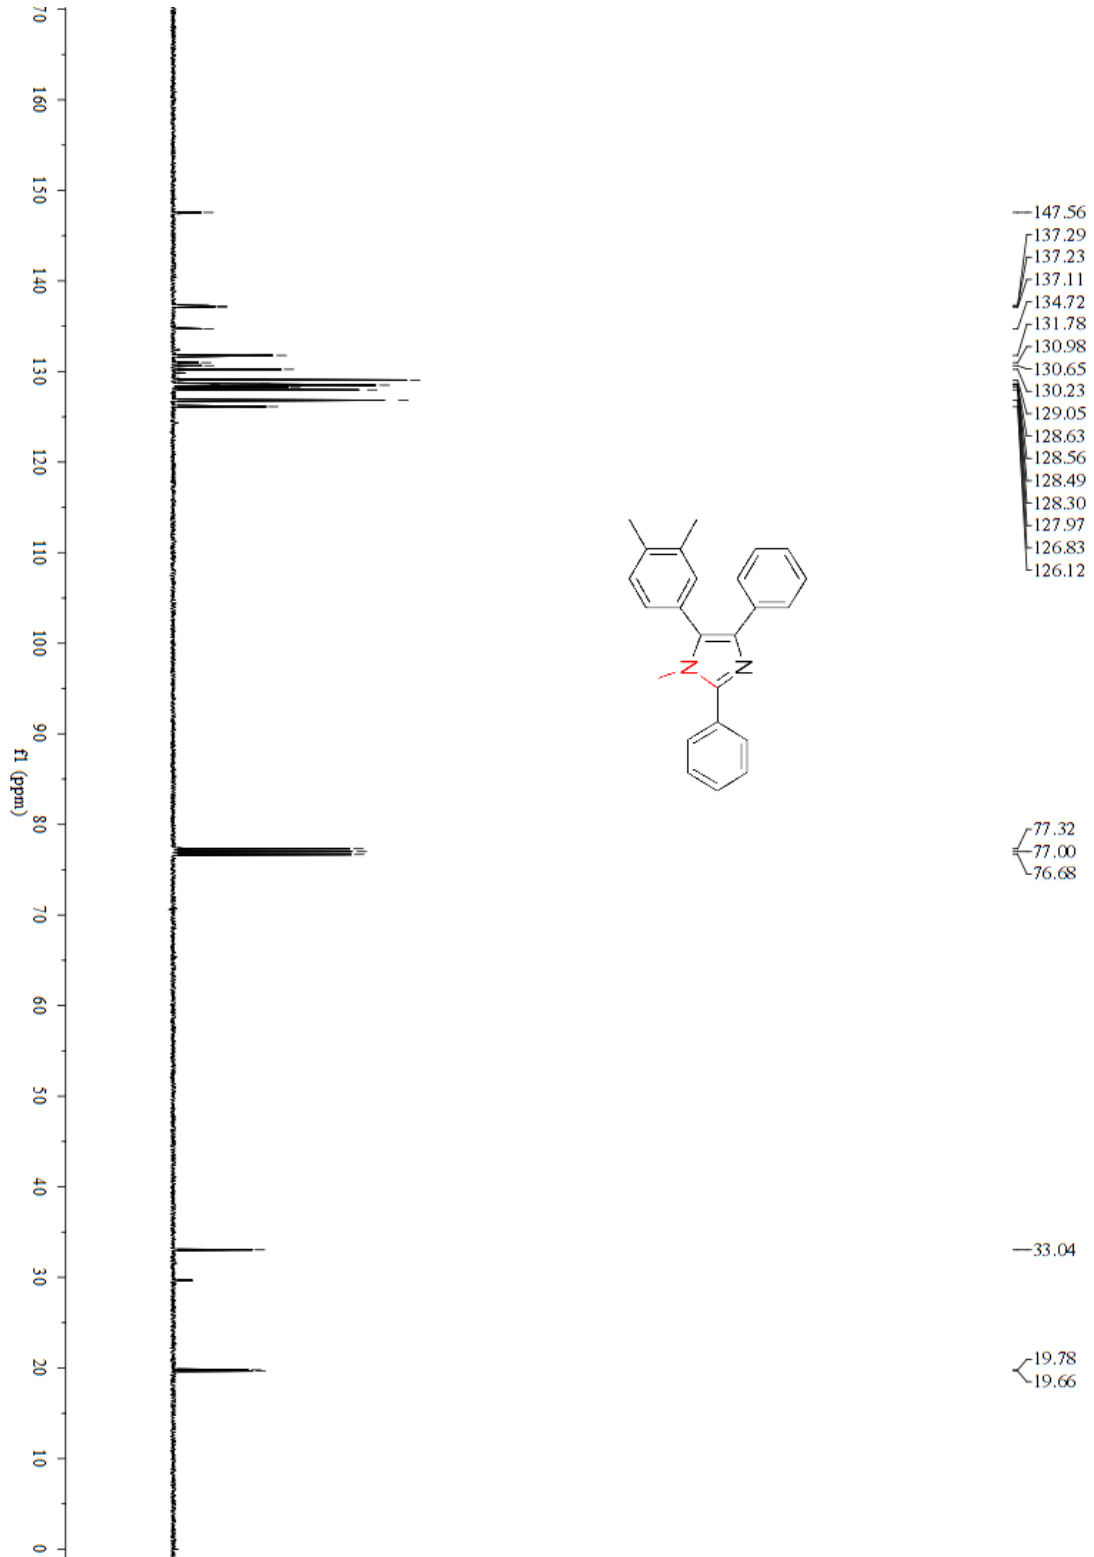

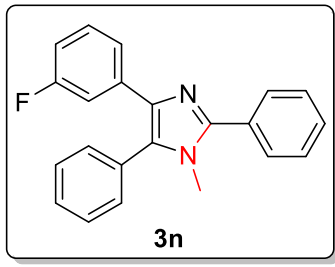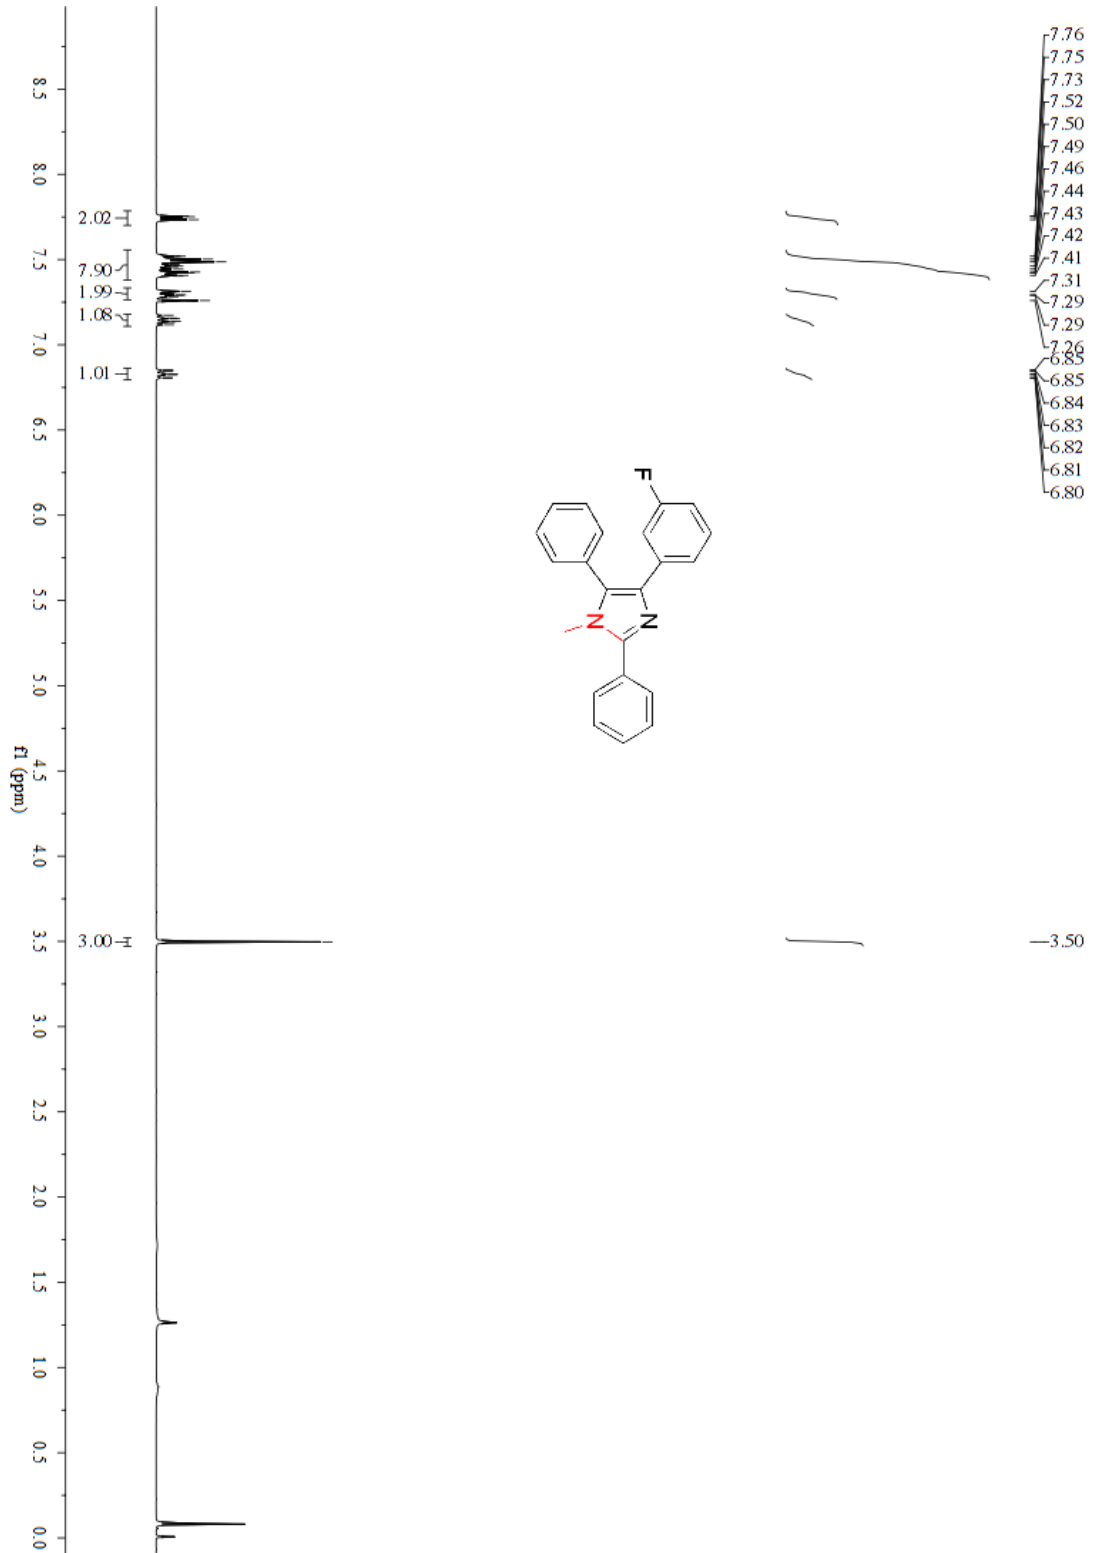

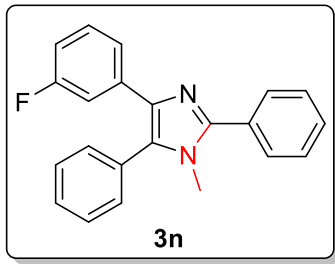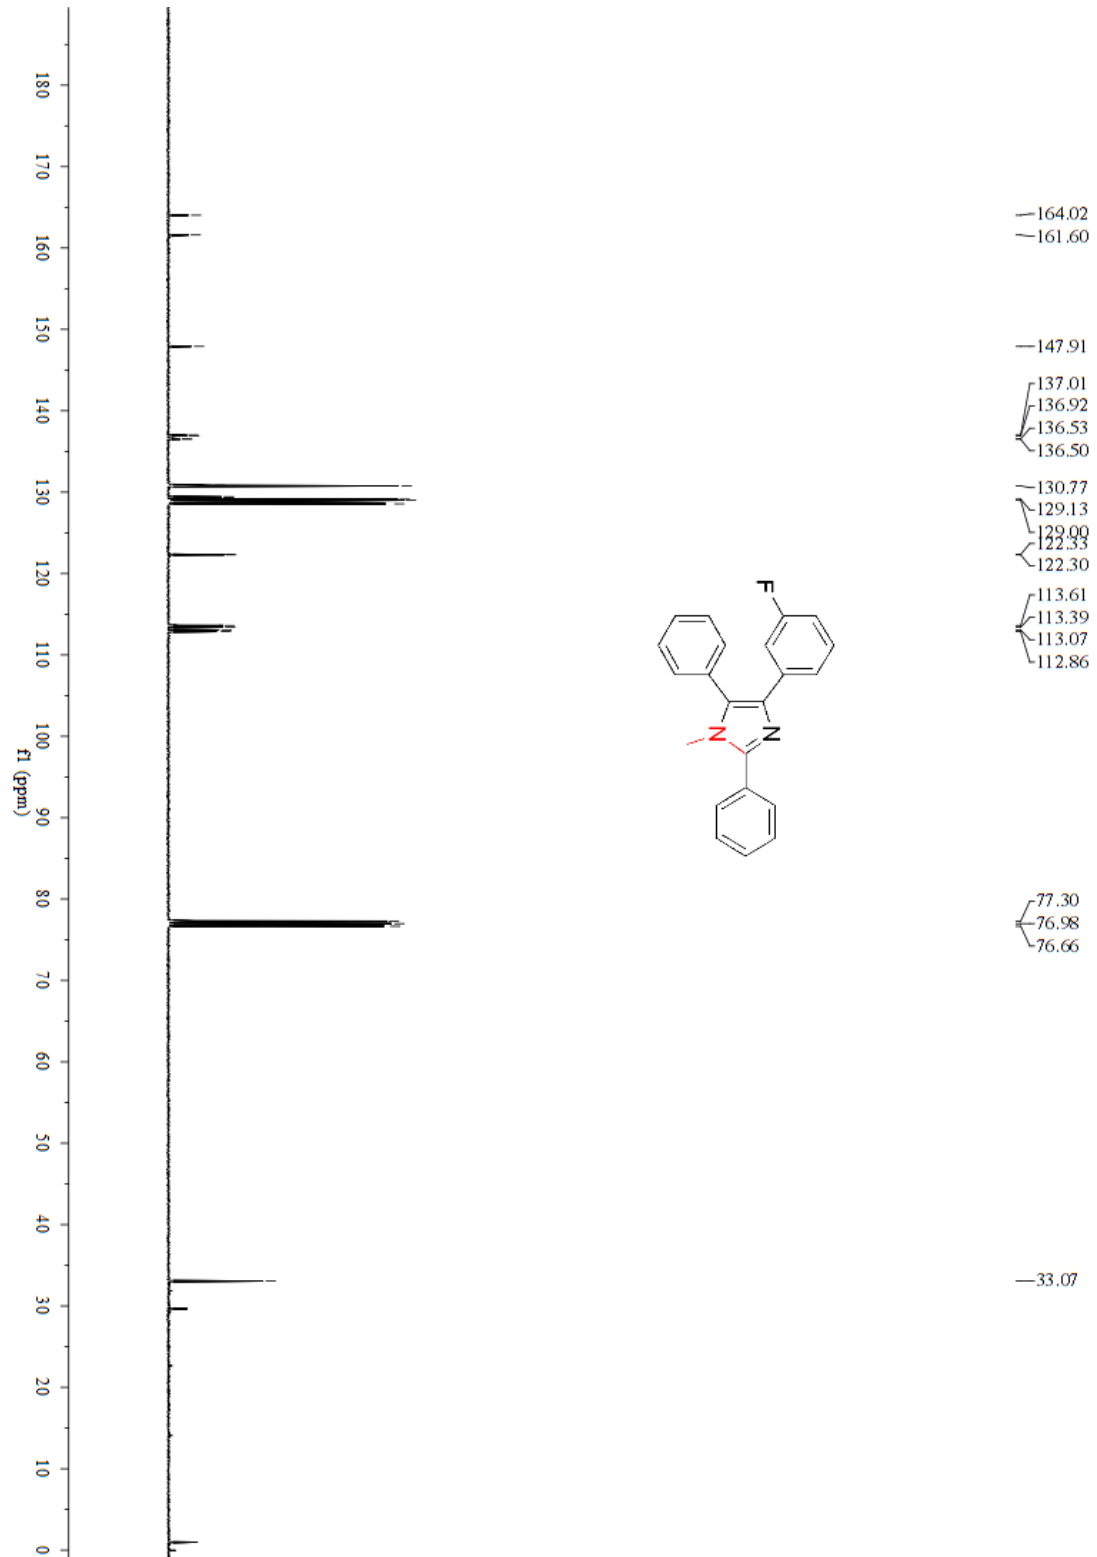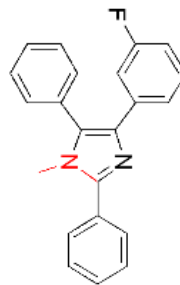



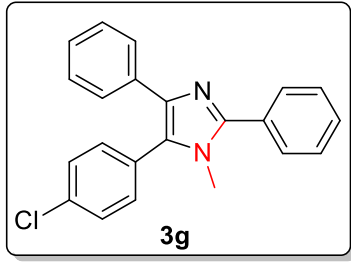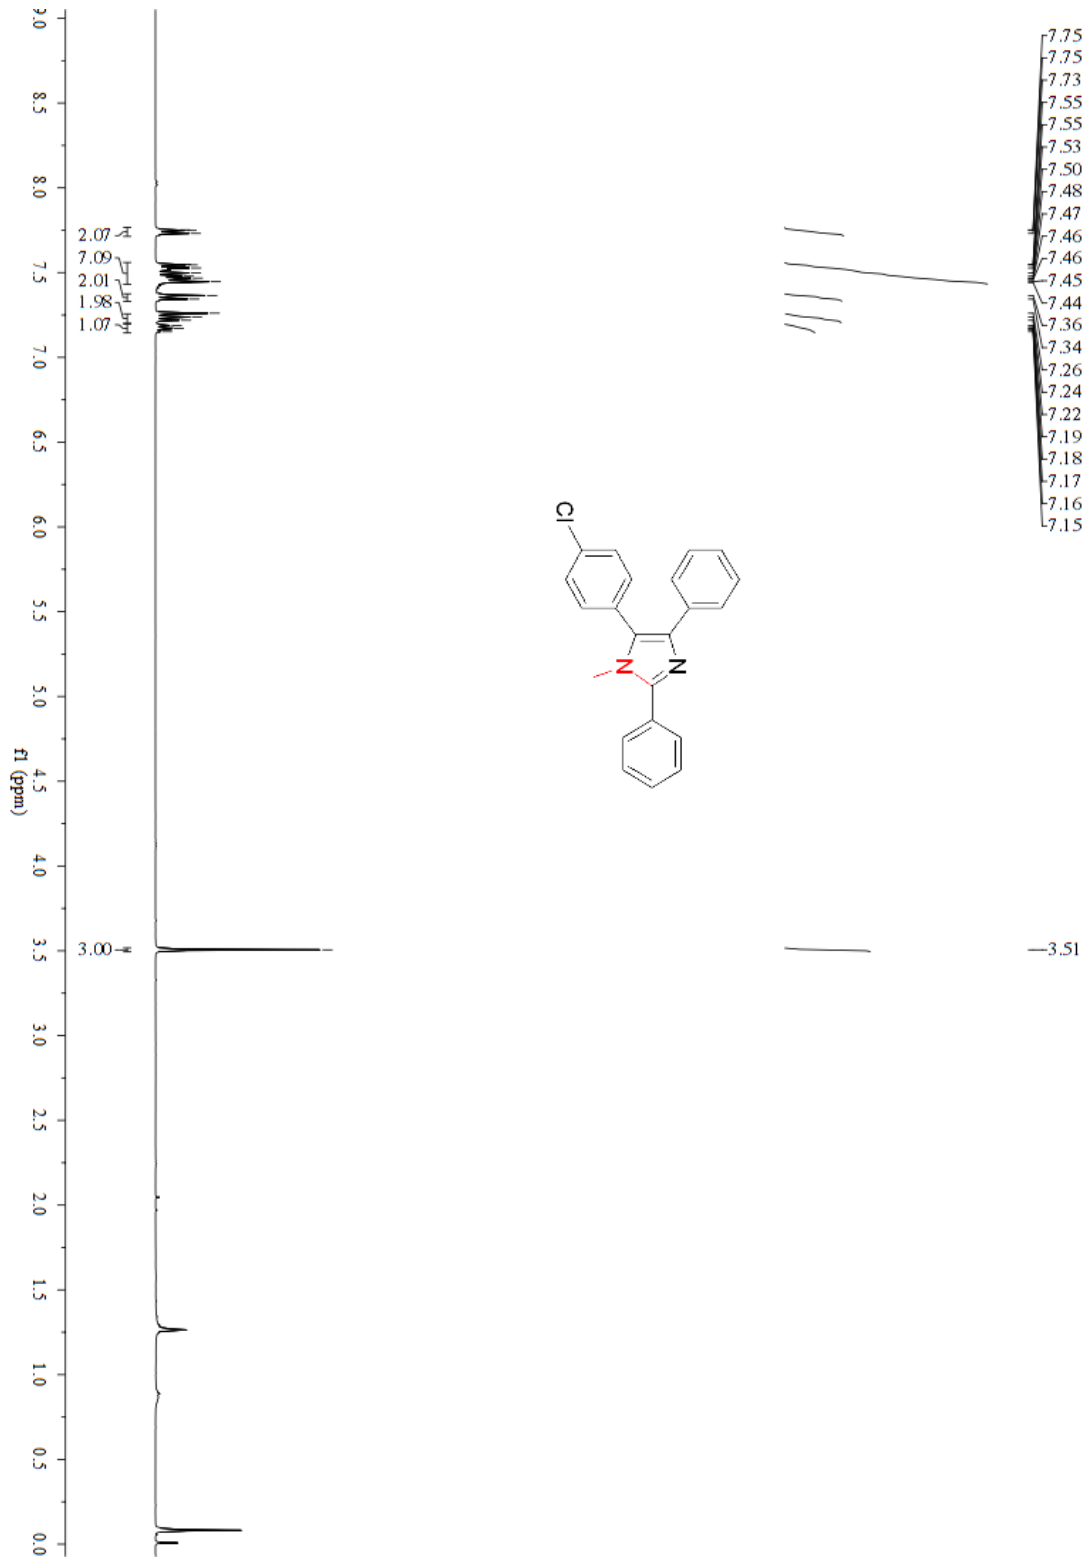

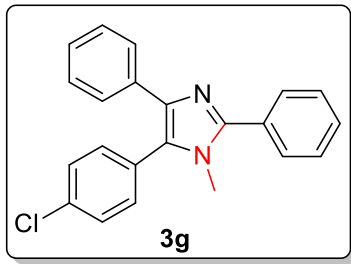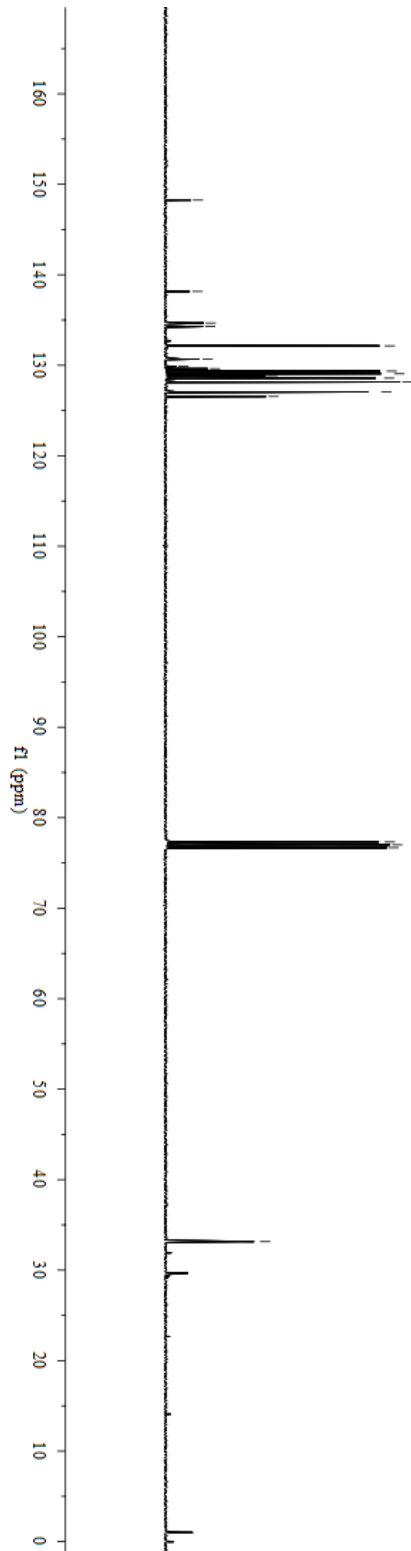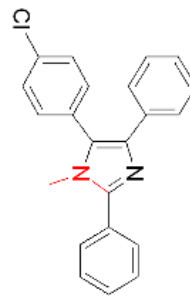

148.25  
 138.16  
 134.67  
 134.28  
 132.15  
 130.69  
 129.90  
 129.62  
 129.35  
 129.06  
 128.88  
 128.58  
 128.15  
 127.06  
 126.55

77.32  
 77.00  
 76.68

33.15

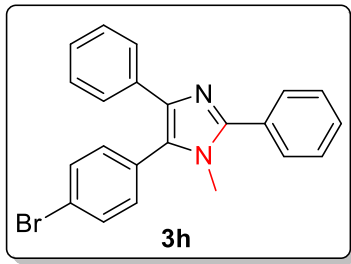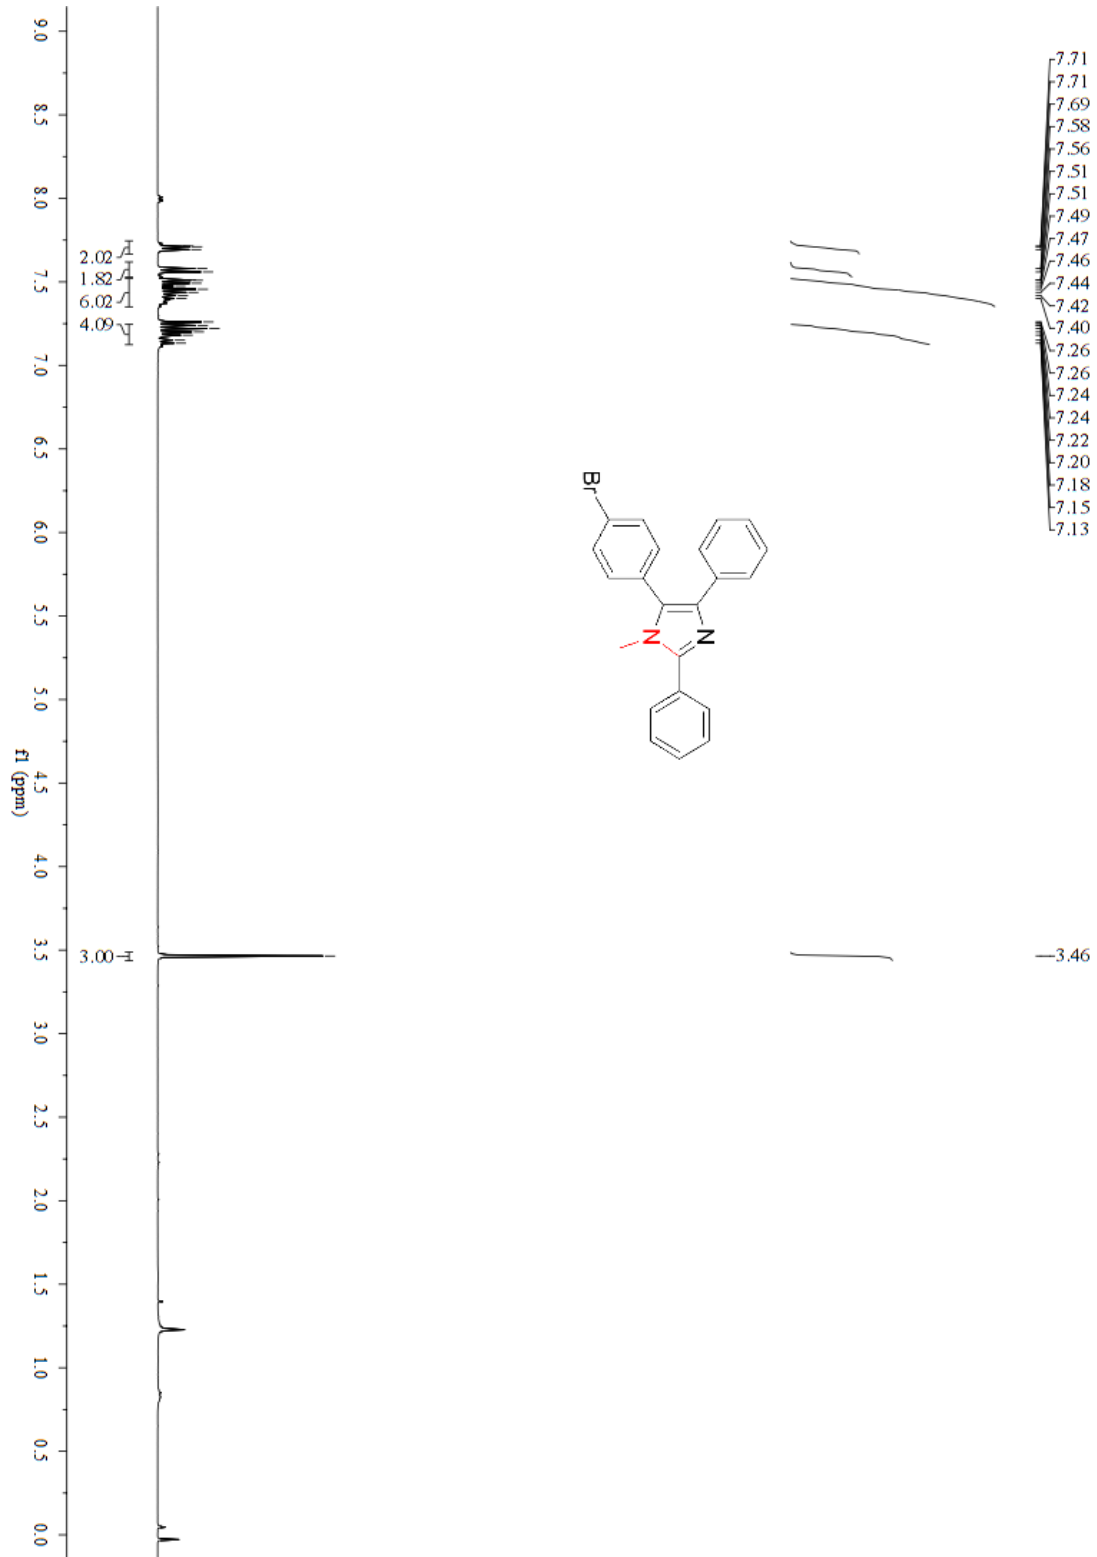

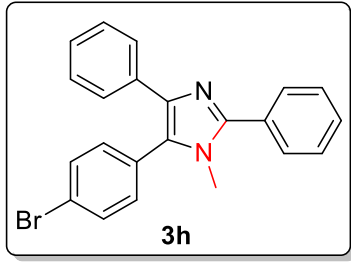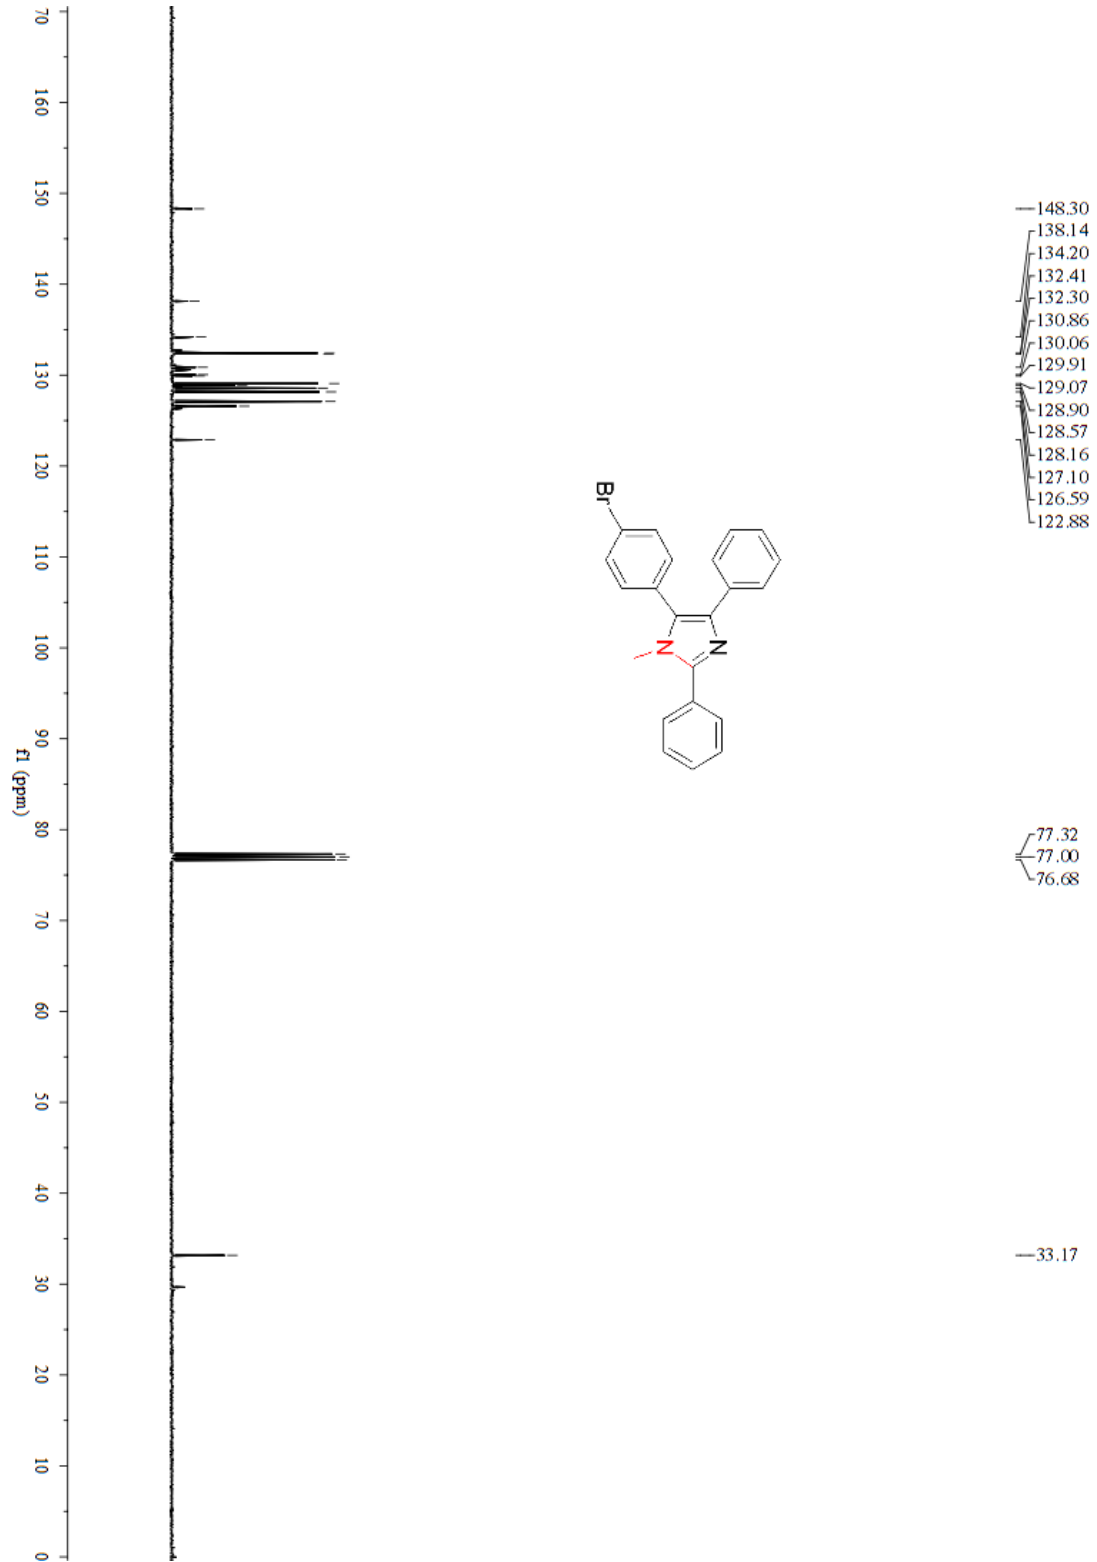

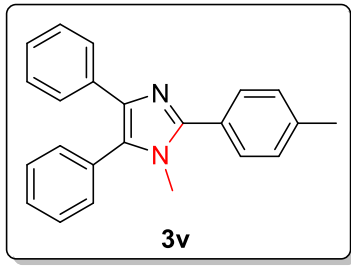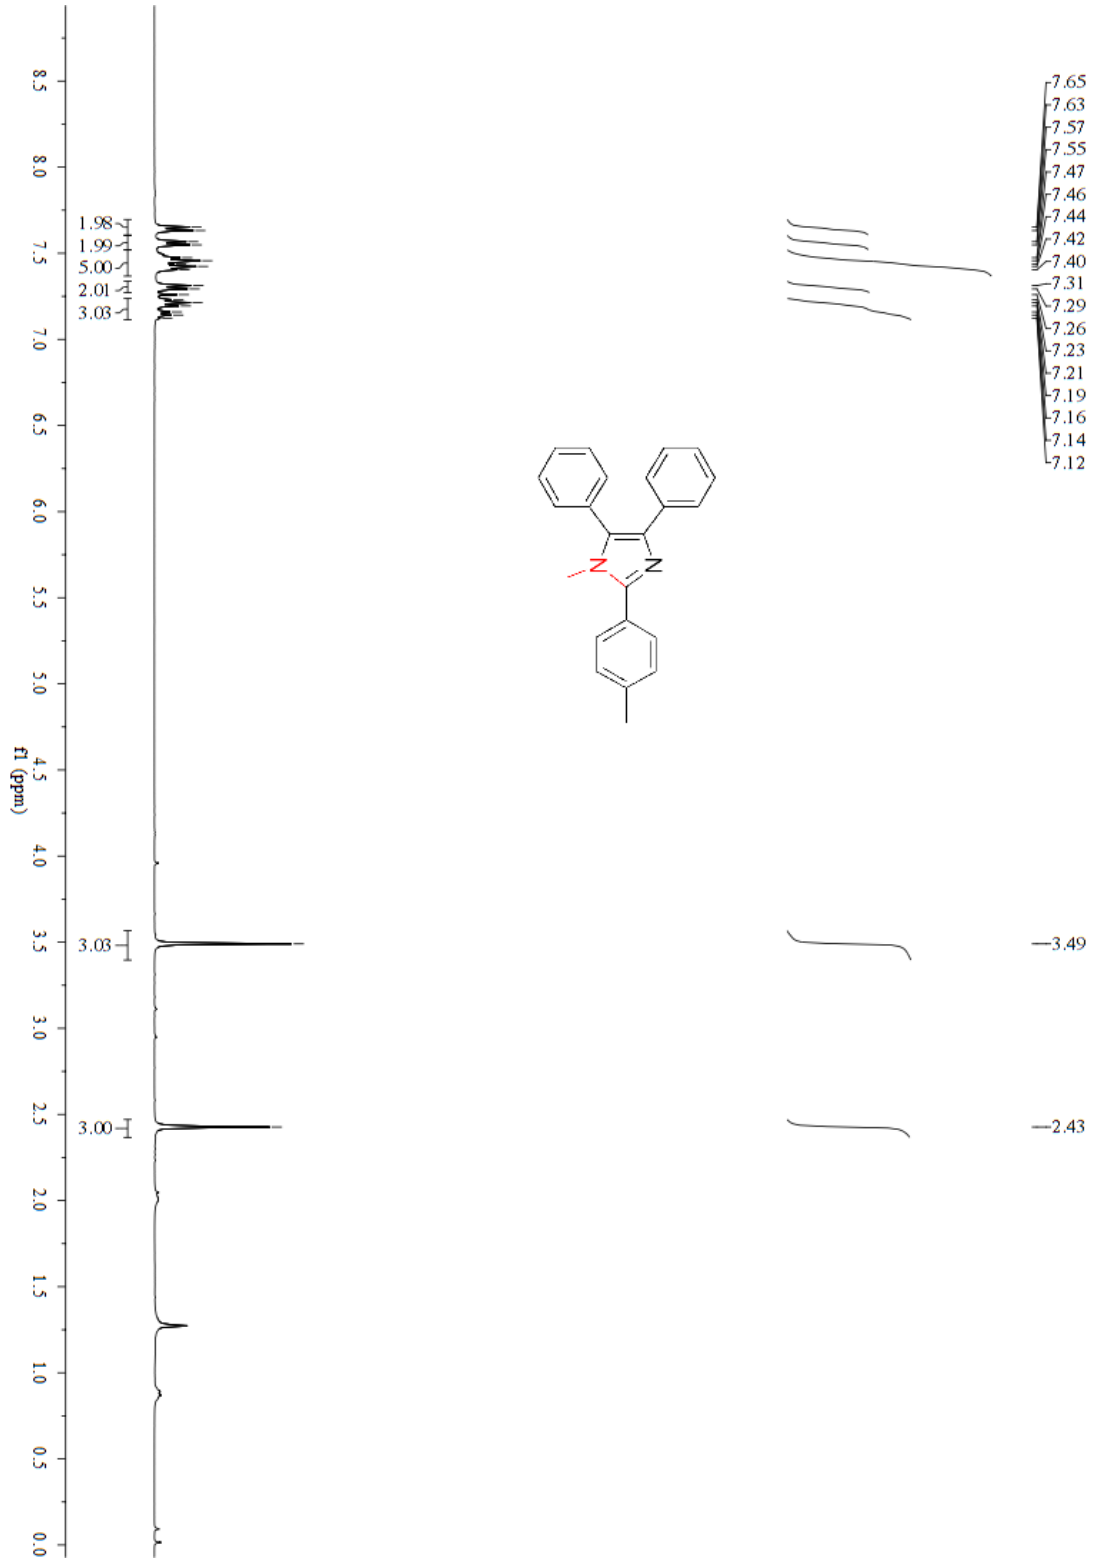

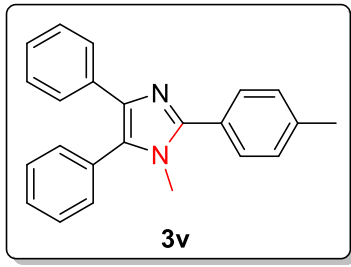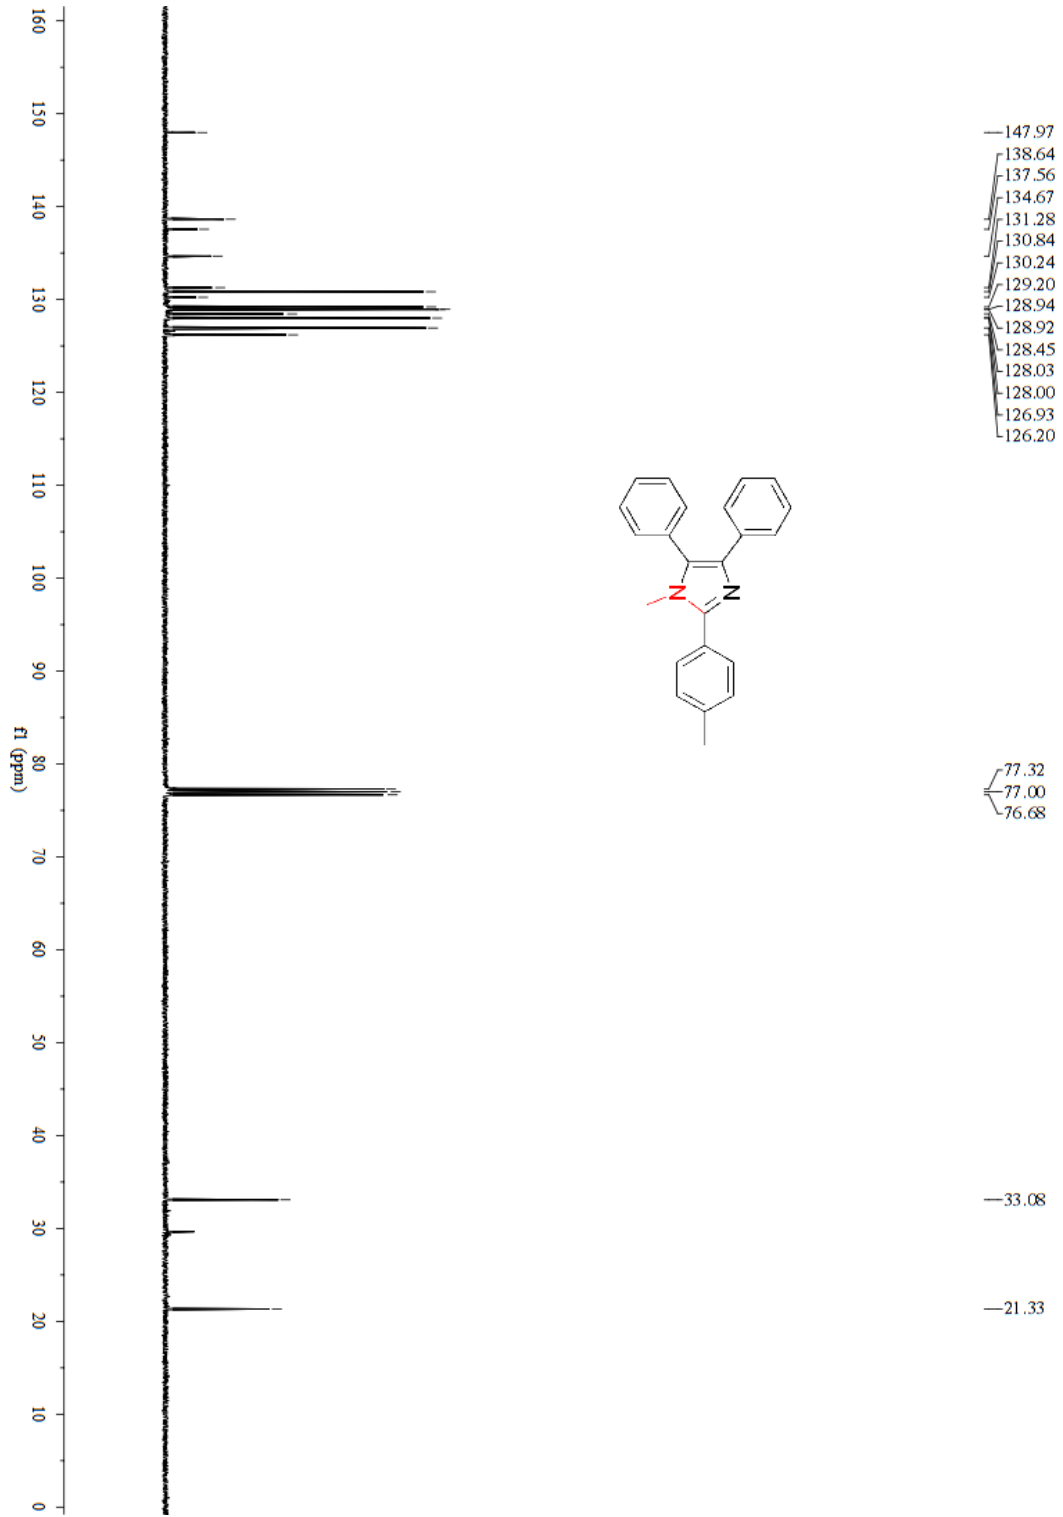

Supplement: d3cc06147g1.pdf [file d3cc06147g1.pdf]
